# Supplementary material for: Electrochemical trifluoromethylation of alkynes: the unique role of DMSO as a masking auxiliary
Source: Royal Society of Chemistry journal article supplement (doi:10.1039/d4sc06780k), 2024-01-01

# **Electrochemical Trifluoromethylation of Alkynes: The Unique Role of DMSO as a Masking Auxiliary**

Jihoon Jang, Ho Seong Hwang, Haeryeong Jeong, and Eun Jin Cho\*

Department of Chemistry, Chung-Ang University, 84 Heukseok-ro, Dongjak-gu, Seoul  
06974, Republic of Korea

E-mail: [ejcho@cau.ac.kr](mailto:ejcho@cau.ac.kr) (E. J. Cho)

## **Supporting Information**

|                                                                                    |      |
|------------------------------------------------------------------------------------|------|
| <b>General Considerations</b>                                                      | S-1  |
| <b>Experimental Details</b>                                                        | S-2  |
| <b>Mechanistic Experiments</b>                                                     | S-4  |
| <b>Details of DFT Studies</b>                                                      | S-8  |
| <b>Analytic Data for Synthesized Compounds</b>                                     | S-10 |
| <b>References</b>                                                                  | S-17 |
| <b>NMR Spectra (<sup>1</sup>H NMR, <sup>13</sup>C NMR, and <sup>19</sup>F NMR)</b> | S-19 |

## General Considerations

### General Reagent Information

All reagents required for the synthesis of CF<sub>3</sub>-alkynes **3** were purchased from Sigma-Aldrich, Alfa Aesar, Acros Organic, or TCI chemical companies. Sodium trifluoromethanesulfinate (NaSO<sub>2</sub>CF<sub>3</sub>) was purchased from Ambeed. Flash column chromatography was performed using ZEOCHEM ZEOprep silica gel 60 (60-200 mesh). Electrochemical reactions were performed using mkc3405 power supply from MK power company or ElectraSyn 2.0 with accessories including vials and electrodes from IKA. Graphite electrode (10 x 20 mm, thickness 2 mm) was purchased from Qingdao-Baofeng graphite company. After each reaction, the graphite electrode surface was washed with acetone/ethanol three times and sonicated using acetone/distilled water for 10 minutes.

### General Analytical Information

The synthesized CF<sub>3</sub>-alkynes **3** were characterized by <sup>1</sup>H NMR, <sup>13</sup>C NMR, <sup>19</sup>F NMR, FT-IR spectroscopy, and mass spectrometry. NMR spectra were recorded on a Bruker 400 MHz Avance-Core instrument (400 MHz for <sup>1</sup>H NMR, 101 MHz for <sup>13</sup>C NMR and 376 MHz for <sup>19</sup>F NMR) and Varian 600 MHz instrument (600 MHz for <sup>1</sup>H NMR, 151 MHz for <sup>13</sup>C NMR and 564 MHz for <sup>19</sup>F NMR). <sup>1</sup>H NMR experiments are reported in units, parts per million (ppm), and were measured relative to residual chloroform (7.26 ppm) in the deuterated solvent. <sup>13</sup>C NMR spectra are reported in ppm relative to chloroform-D (77.23 ppm), and all were obtained with <sup>1</sup>H decoupling. The coupling constants were reported in hertz (Hz) and the multiplicities were denoted using abbreviations, such as: s for singlet, d for doublet, t for triplet, q for quartet, dd for doublet of doublets, dt for doublet of triplets, dq for doublet of quartet, qq for quartet of quartet, and m for multiplet. FT-IR spectra were recorded on a Nicolet 6700 Thermo Scientific FT-IR spectrometer. Reactions were monitored by thin layer chromatography (TLC) or GC-MS of the crude reaction mixture using *n*-dodecane as the internal standard and products were detected by GC-MS using the Agilent GC 7890B/5977A inert MSD with Triple-Axis Detector. Mass spectral data of all unknown compounds were acquired at the Korea Basic Science Institute (Daegu) on a Jeol JMS 700 high-resolution mass spectrometer. A quadrupole mass analyzer was used for HRMS measurements. For cyclic voltammetry measurement, CHI620E potentiostat (CH Instruments) was used.

## Experimental Details

### General Procedure for Electrochemical Synthesis of CF<sub>3</sub>-alkynes.

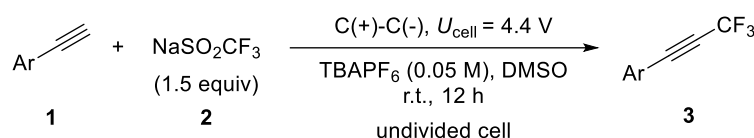

A reaction tube equipped with stirring bar was charged with phenyl acetylene derivative **1** (0.3 mmol, 1.0 equiv.), sodium trifluoromethanesulfinate **2** (70 mg, 0.45 mmol, 1.5 equiv.), TBAPF<sub>6</sub> (117 mg, 3mmol, 1.0 equiv.), in DMSO (6 mL). The reaction tube was sealed with a silicon septum screw cap and then purged with argon gas using a balloon for 10 minutes. A two-electrode setup with graphite plates both for anode and cathode (surface area = 1 × 1 × 0.2 cm<sup>3</sup>) was used. The constant potential electrolysis was performed at 4.4 V. The reaction progress was monitored using TLC and/or fluorine NMR (<sup>19</sup>F NMR). After completion, the mixture was diluted with dichloromethane (20 mL) and washed with brine. The combined organic layer was dried over MgSO<sub>4</sub>, filtered, and the filtrate was concentrated under reduced pressure. The resultant residue was purified by flash column chromatography to yield the corresponding CF<sub>3</sub>-alkynes **3**.

### Gram Scale Reaction of Electrochemical Synthesis of CF<sub>3</sub>-alkynes

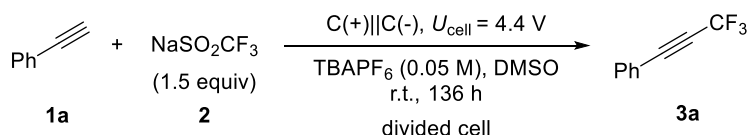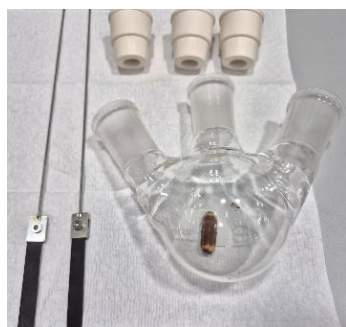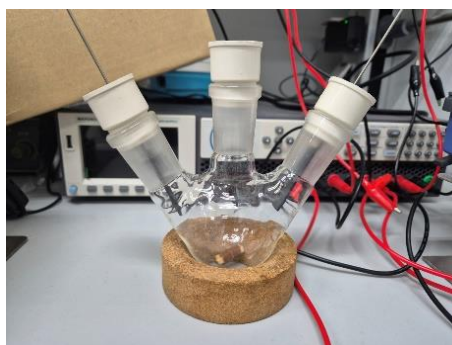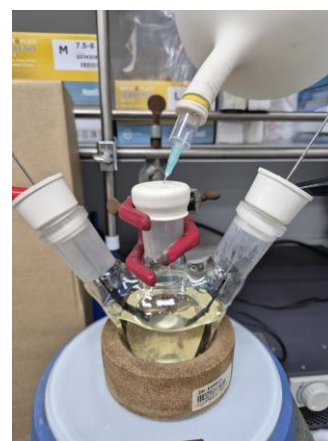

A reaction tube equipped with stirring bar was charged with phenyl acetylene **1a** (20 mmol, 1.0 equiv.), sodium trifluoromethanesulfinate **2** (4.68 g, 30 mmol, 1.5 equiv.), and TBAPF<sub>6</sub> (1.45 g, 3.75 mmol) in DMSO (75 mL). The reaction tube was sealed with a silicon septum screw cap and then purged with argon gas using a balloon for 10 minutes. A two-electrode

setup with graphite plates both for anode and cathode (surface area =  $1 \times 4 \times 0.2 \text{ cm}^3$ ) was used. The electrolysis was performed constant potential at 4.4 V. The reaction progress was monitored using TLC and/or  $^{19}\text{F}$  NMR. After completion, the mixture was diluted with dichloromethane (200 mL) and washed with brine ( $150 \times 2 \text{ mL}$ ). The combined organic layer was dried over  $\text{MgSO}_4$ , filtered, and the filtrate was concentrated under reduced pressure. The resultant residue was purified by flash column chromatography to yield the corresponding  $\text{CF}_3$ -alkyne **3a** (56%, 2.85 g).

### Optimization of Cell Potential<sup>a,b</sup>

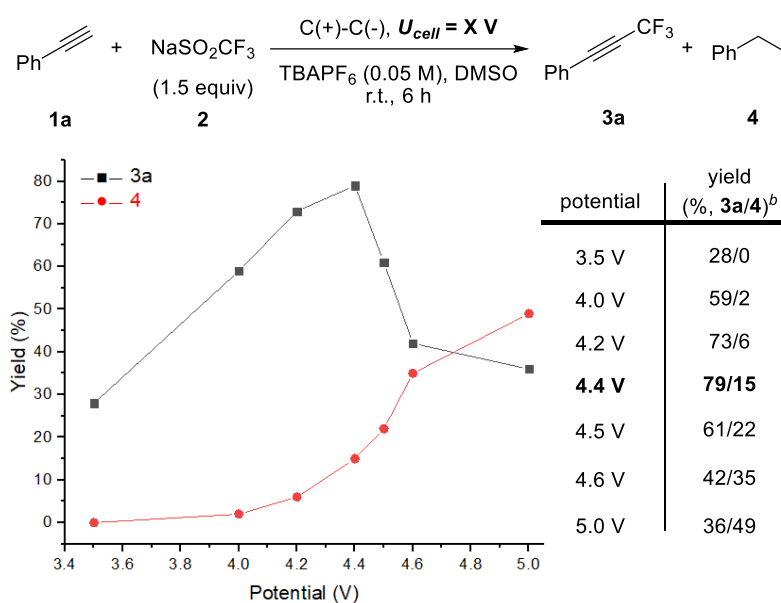

**Figure S1.** <sup>a</sup>0.1 mmol scale. <sup>b</sup>Yields were determined by GC-MS dodecane as an internal standard.

## Mechanistic Experiments

### Measurement of response cell potential over time

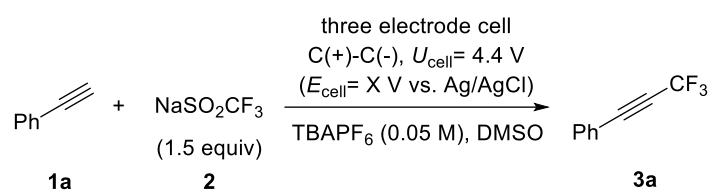

| reaction time | $E_{\text{cell}}$<br>(V vs. Ag/AgCl) |
|---------------|--------------------------------------|
| 0 h           | 0.9 V<br>(5.2 mA)                    |
| 1 h           | 1.0 V<br>(4.9 mA)                    |
| 2 h           | 1.1 V<br>(4.0 mA)                    |
| 3.5 h         | 1.2 V<br>(3.1 mA)                    |
| 5 h           | 1.2 V<br>(2.9 mA)                    |
| 6.5 h         | 1.2 V<br>(2.6 mA)                    |

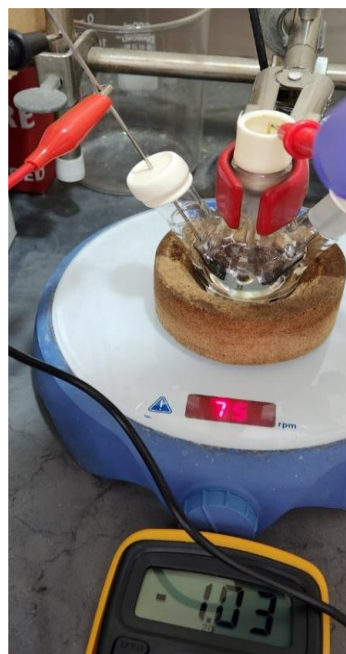

**Figure S2.** Photographs of using power supply reaction setup;  $E_{\text{cell}}$  measurement using multimeter.

## Kinetic Isotope Effect Experiments<sup>a,b</sup>

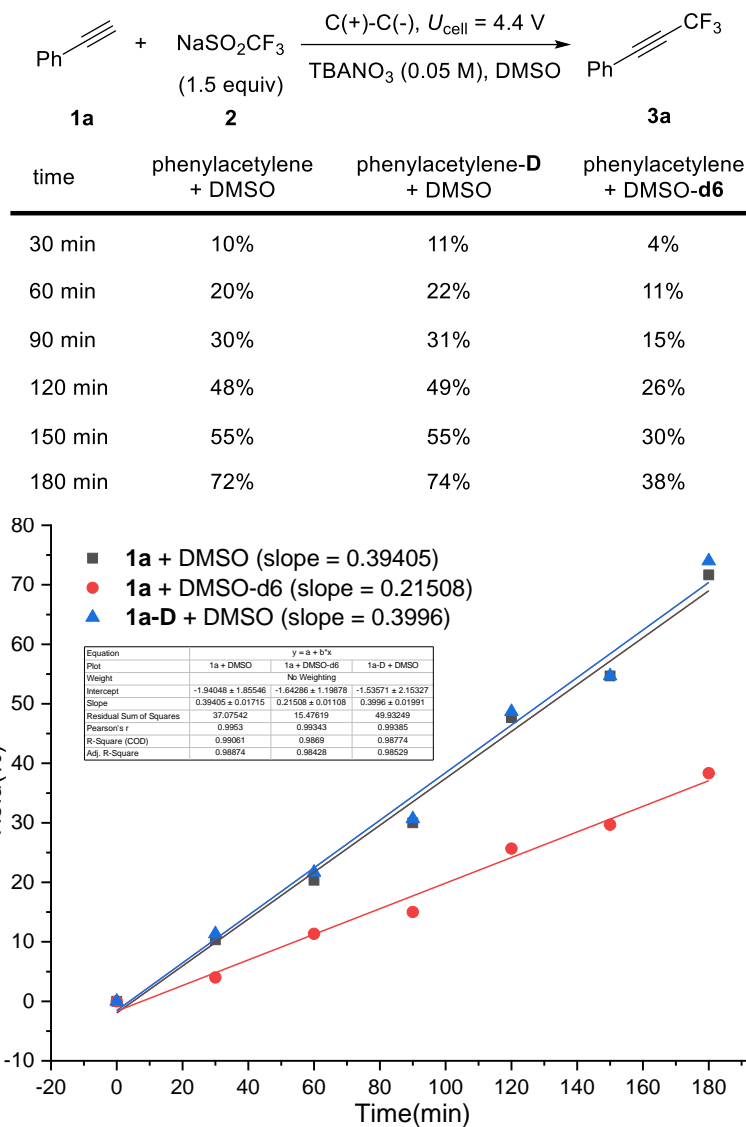

**Figure S3.** <sup>a</sup>0.1 mmol scale. <sup>b</sup>Yields were determined by GC-MS dodecane as an internal standard.

$$\text{KIE} = k_{\text{H}}/k_{\text{D}} = \text{slope of (1a + DMSO)}/\text{slope of (1a + DMSO-d6)} = 1.83$$

An oven-dried standard 20 mL ElectraSyn vial equipped with a magnetic stir bar was brought into a glove box. A vial charged with phenyl acetylene **1a/1a-D** (0.3 mmol, 1.0 equiv.), sodium trifluoromethanesulfinate (0.45 mmol, 1.5 equiv.), and TBAPF<sub>6</sub> (0.3 mmol, 1.0 equiv.) and anhydrous DMSO/DMSO-d<sub>6</sub> (6 mL) in the glove box and installed the cap. The vial positioned in the ElectraSyn and the mixture was electrolyzed under constant potential condition (4.4 V). The reaction progress was monitored by TLC and <sup>19</sup>F NMR.

### Cyclic Voltammetry Experiments

The ground-state oxidation potential ( $E_{\text{ox}}$ ) of phenylacetylene **1a**, sodium trifluoromethanesulfinate **2** ( $\text{NaSO}_2\text{CF}_3$ ), DMSO, and mixtures were determined by cyclic voltammetry. Samples were dissolved at a concentration of 5 mM in 5 mL of degassed acetonitrile (MeCN) containing 0.10 M tetrabutylammonium hexafluorophosphate ( $\text{TBAPF}_6$ ). A three-electrode cell assembly consisting of a glassy carbon (GC) working electrode, a Pt coiled counter electrode, and Ag/AgCl pseudo reference electrode was employed for the voltammetric measurements. Voltammograms were measured at a scan rate of 30  $\text{mV s}^{-1}$ . Oxidations were measured by scanning potentials in positive direction. Data was analyzed by using Origin pro software. All resulted redox potentials were calibrated using ferrocene redox couple (0.42 V vs. Ag/AgCl).

### Electrochemical Synthesis of CF<sub>3</sub>-alkynes Using Divided Cell.

The electrolysis was carried out using IKA Electrasyn 2.0 in H-type divided cell (IKA Pro-Divide; purchased from IKA) equipped magnetic stirrer bars on anodic chamber and cathodic chamber. Graphite electrode (purchased from IKA) was used as anode and cathode. The anodic chamber was charged acetylene **1** (0.3 mmol, 1.0 equiv.), sodium trifluoromethanesulfinate **2** (0.45 mmol, 1.5 equiv.), and TBAPF<sub>6</sub> (0.3 mmol, 1.0 equiv.) in DMSO (6 mL). The cathodic chamber was charged sulfuric acid (0.1 M) and TBAPF<sub>6</sub> (0.3 mmol) in DMSO (6 mL). The electrolysis was performed constant potential at 9 V. The reaction progress was monitored using TLC and <sup>19</sup>F NMR. After completion, the working electrode cell reaction mixture was diluted with dichloromethane (20 mL) and washed with brine. The combined organic layer was dried with MgSO<sub>4</sub>, filtered, and the filtrate was concentrated under reduced pressure. The resultant residue was purified by flash column chromatography to yield the corresponding CF<sub>3</sub>-alkynes **3**.

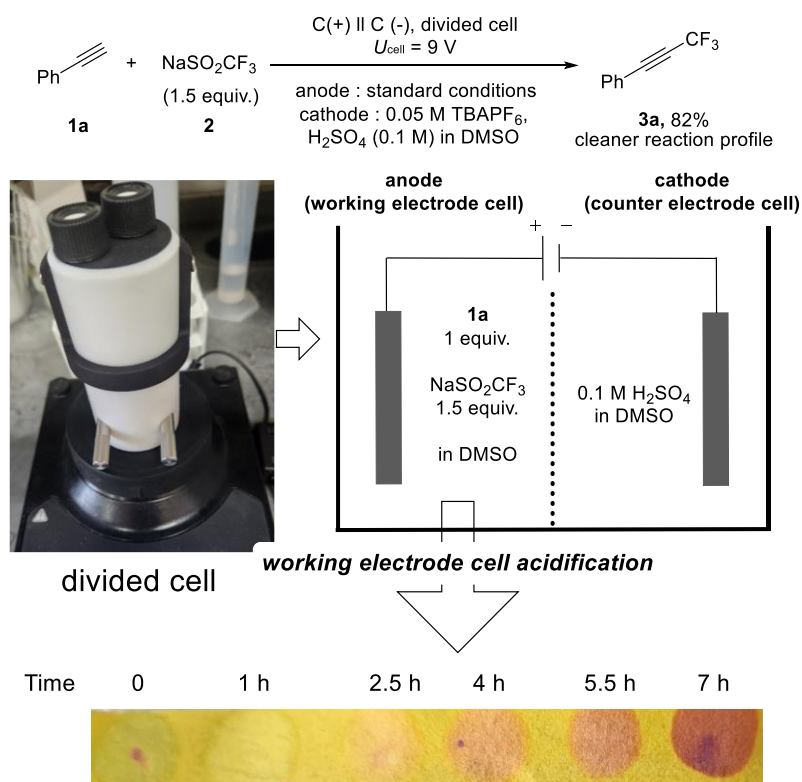

Figure S4.



## Details of DFT Studies

All calculations were performed by using the density functional theory (DFT) with the GAUSSIAN 16 program package<sup>S-1</sup>. For the initial calculation of geometry optimizations, (U)M06-2X<sup>S-2</sup> functional with TZVP<sup>S-3</sup> basis set were used. For the calculation of DMSO-SO<sub>2</sub>CF<sub>3</sub> stabilization, def2TZVP<sup>S-4</sup> basis set were used for the geometry optimization. Frequency calculation and transition state structures were performed for all stationary points to confirm the local minima, thermodynamic parameters including Gibbs free energies at 298 K. Solvent effects were considered at the polarizable continuum model (PCM) method<sup>S-5</sup> in dimethylsulfoxide solvent ( $\epsilon = 46.8$ ). All transition state structures were visualized by GaussView 6<sup>S-6</sup> and CYLview<sup>S-7</sup>.

All calculated free energy differences ( $\Delta G$ ) are given by following equation (Eq 1.)

$$\Delta G = \Sigma G_{298}(\text{product}) - \Sigma G_{298}(\text{reactant}) \quad (1)$$

The redox potential relative to the Ag/AgCl pseudo-reference electrode is given by following equation (Eq 2.)

$$\Delta E = -\frac{1}{F}(\Delta G - \Delta G_{SHE} - 0.197) \quad (2)$$

$$\Delta G_{SHE} = 4.44 \text{ eV (The absolute potential of standard hydrogen electrode)}$$

## Cartesian coordinates and energies of all optimized intermediate geometries

### DMSO

|   |            |             |             |
|---|------------|-------------|-------------|
| F | 1.39098500 | -1.07932500 | -0.53081000 |
| F | 1.39092100 | 1.07975800  | -0.53018500 |

E(RM062X/def2TZVP): -553.201905 a. u.

G<sub>298</sub>(RM062X/def2TZVP): -553.150214 a. u.

Charge = 0 / Multiplicity = 1

|   |             |             |             |
|---|-------------|-------------|-------------|
| C | -1.34525300 | -0.78674400 | 0.18711400  |
| H | -1.32486100 | -1.76206600 | -0.29652800 |
| H | -2.26933300 | -0.26839600 | -0.05929600 |
| H | -1.23551300 | -0.87987300 | 1.26679500  |
| S | -0.00006000 | 0.21663400  | -0.44313200 |
| O | -0.00078500 | 1.47305100  | 0.37783800  |
| C | 1.34599500  | -0.78551800 | 0.18716600  |
| H | 1.23627300  | -0.87942200 | 1.26679900  |
| H | 1.32630400  | -1.76049000 | -0.29726600 |
| H | 2.26991800  | -0.26673300 | -0.05878000 |

### SO<sub>2</sub>CF<sub>3</sub> radical

E(UM062X/def2TZVP): -886.247387 a. u.

G<sub>298</sub>(UM062X/def2TZVP): -553.150214 a. u.

Charge = 0 / Multiplicity = 2

|   |             |             |             |
|---|-------------|-------------|-------------|
| C | 0.87080200  | 0.00003700  | 0.00400600  |
| S | -1.01212100 | 0.00000200  | -0.33433900 |
| O | -1.47485700 | -1.25949200 | 0.19501700  |
| O | -1.47521700 | 1.25934100  | 0.19502600  |
| F | 1.05917500  | -0.00032800 | 1.30600100  |

### DMSO-SO<sub>2</sub>CF<sub>3</sub> radical

E(UM062X/def2TZVP): -1439.443003 a. u.

G<sub>298</sub>(UM062X/def2TZVP): -1439.382483 a. u.

Charge = 0 / Multiplicity = 2

|   |             |             |             |
|---|-------------|-------------|-------------|
| S | -2.31285200 | -0.11467200 | -0.24307900 |
| O | -3.31359300 | -0.10214700 | -1.32087900 |
| C | -2.64246900 | 1.21598300  | 0.88666000  |
| H | -2.48045500 | 2.13994800  | 0.33593800  |
| H | -3.67882400 | 1.12210100  | 1.20573100  |
| H | -1.94167000 | 1.12511400  | 1.71103200  |
| C | -2.48529300 | -1.60251800 | 0.70703600  |
| H | -1.80438700 | -1.53684200 | 1.55004300  |
| H | -3.52683200 | -1.66737700 | 1.01659900  |
| H | -2.21612100 | -2.42548400 | 0.04928700  |
| O | -0.11853300 | -0.12361600 | 0.42251300  |
| S | 0.85117900  | 0.67525100  | -0.45265400 |
| C | 2.34284700  | -0.37214900 | -0.03510800 |
| O | 1.21006100  | 1.95564000  | 0.18032100  |
| F | 2.56625100  | -0.39801400 | 1.27429100  |
| F | 2.17851100  | -1.62289400 | -0.45991600 |
| F | 3.42424500  | 0.13050300  | -0.63038200 |

### B

E(UM062X/def2TZVP): -1199.166968 a. u.

G<sub>298</sub>(UM062X/def2TZVP): -1199.004969 a. u.

E(RM062X/TZVP): -1199.042957 a. u.

Charge = 0 / Multiplicity = 2

|   |             |             |             |
|---|-------------|-------------|-------------|
| C | -3.34193900 | -1.37971000 | -0.09845600 |
| C | -1.96310500 | -1.42089200 | 0.06149700  |
| C | -1.22994100 | -0.24166900 | 0.20611000  |
| C | -1.90378000 | 0.98126900  | 0.17571500  |
| C | -3.28385700 | 1.02346200  | 0.02057700  |
| C | -4.00423700 | -0.15731500 | -0.11470100 |
| H | -3.89954400 | -2.30117500 | -0.20799500 |
| H | -1.44077400 | -2.36994700 | 0.07548900  |
| H | -1.33840900 | 1.90128900  | 0.26725700  |
| H | -3.79525100 | 1.97751400  | 0.00367600  |
| H | -5.07967900 | -0.12505800 | -0.23533700 |
| C | 0.24493300  | -0.30572100 | 0.39587900  |
| C | 1.21005800  | -0.06125600 | -0.59850100 |
| H | 2.26755100  | -0.16113400 | -0.40223800 |
| C | 0.84000000  | 0.27599800  | -1.97104600 |
| F | 1.92247000  | 0.34991700  | -2.77020200 |
| F | 0.19556300  | 1.47221600  | -2.11248500 |
| F | -0.00420200 | -0.61351200 | -2.56624300 |
| S | 0.82025900  | -0.16807000 | 1.99636900  |
| C | -0.44360700 | -0.81696300 | 3.08048100  |
| H | -1.35247700 | -0.22918400 | 2.97542400  |
| H | -0.60526400 | -1.85273000 | 2.79224600  |
| H | -0.03488700 | -0.74662100 | 4.08615100  |
| C | 1.05355100  | 1.53627200  | 2.57670300  |
| H | 1.45052800  | 1.50125400  | 3.58912900  |
| H | 1.76863600  | 1.97854700  | 1.88577800  |
| H | 0.09587600  | 2.05042000  | 2.53327000  |
| O | 2.13617700  | -0.84135200 | 2.20699400  |

**B<sup>+</sup>**

G<sub>298</sub>(RM062X/TZVP): -1198.875467 a. u.

Charge = 1 / Multiplicity = 1

|   |             |             |             |
|---|-------------|-------------|-------------|
| C | -3.36339500 | -1.03735400 | 0.11973100  |
| C | -1.98634300 | -1.12469000 | 0.25507500  |
| C | -1.21576900 | 0.03777300  | 0.20856200  |
| C | -1.82030200 | 1.28046600  | 0.01763800  |
| C | -3.19920400 | 1.35673800  | -0.11571000 |
| C | -3.96881400 | 0.20127800  | -0.05990800 |
| H | -3.96277900 | -1.93738900 | 0.14957700  |
| H | -1.50859100 | -2.08947500 | 0.37490400  |
| H | -1.21285600 | 2.17543600  | -0.03946000 |
| H | -3.67010200 | 2.31887900  | -0.26666300 |
| H | -5.04408100 | 0.26472700  | -0.16458300 |
| C | 0.25344200  | -0.04353400 | 0.34367800  |
| C | 1.19094200  | -0.11840800 | -0.58357800 |
| H | 2.24694800  | -0.15551100 | -0.33973200 |
| C | 0.83905000  | -0.14042300 | -2.05246000 |
| F | 1.92662100  | -0.37074300 | -2.78732100 |
| F | 0.32272900  | 1.02758600  | -2.44676400 |
| F | -0.05321700 | -1.09040600 | -2.34026100 |
| S | 0.92315700  | -0.00600400 | 2.02834300  |
| C | 0.12726500  | -1.33653200 | 2.90896200  |
| H | -0.95054000 | -1.19911700 | 2.85306400  |
| H | 0.44703000  | -2.25806800 | 2.42658800  |
| H | 0.48719200  | -1.27697200 | 3.93440400  |
| C | 0.34083300  | 1.51684400  | 2.74949100  |
| H | 0.65009800  | 1.49541700  | 3.79287400  |
| H | 0.83501100  | 2.31721600  | 2.20191100  |
| H | -0.74206600 | 1.56278300  | 2.64962000  |
| O | 2.39239200  | -0.11467000 | 2.03356100  |

## Analytic Data for Synthesized Compounds

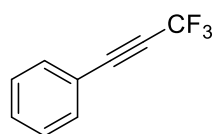

(3,3,3-trifluoroprop-1-yn-1-yl)benzene,<sup>S-8</sup> **3a** was prepared according to general procedure: yellow oil; yield = 74%; <sup>1</sup>H NMR (400 MHz, CDCl<sub>3</sub>) δ 7.57 (d, *J* = 8.0 Hz, 2H), 7.49 (t, *J* = 7.6 Hz, 1H), 7.41 (dd, *J* = 8.0, 7.6 Hz, 2H); <sup>13</sup>C NMR (101 MHz, CDCl<sub>3</sub>) δ 132.66 (q, *J* = 1.5 Hz), 131.10, 128.87, 118.76 (q, *J* = 1.8 Hz), 115.14 (q, *J* = 257.5 Hz), 86.77 (q, *J* = 6.6 Hz), 75.91 (q, *J* = 52.9 Hz); <sup>19</sup>F NMR (376 MHz, CDCl<sub>3</sub>) δ -49.83; IR (neat):  $\nu_{\max}$  = 2883, 2835, 2249, 1313, 1137 cm<sup>-1</sup>; LRMS *m/z* (EI) calc. for C<sub>9</sub>H<sub>5</sub>F<sub>3</sub> [M<sup>+</sup>] = 170.1, found 170.1; *R<sub>f</sub>* = 0.6 (hex).

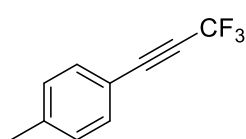

1-methyl-4-(3,3,3-trifluoroprop-1-yn-1-yl)benzene,<sup>S-9</sup> **3ab** was prepared according to general procedure: yellow oil; yield = 61%; <sup>1</sup>H NMR (400 MHz, CDCl<sub>3</sub>) δ 7.45 (d, *J* = 8.0 Hz, 2H), 7.20 (d, *J* = 8.0 Hz, 2H), 2.40 (s, 3H); <sup>13</sup>C NMR (101 MHz, CDCl<sub>3</sub>) δ 141.68, 132.58 (q, *J* = 1.5 Hz), 129.62, 115.67 (q, *J* = 1.8 Hz), 115.18 (q, *J* = 257.5 Hz), 87.15 (q, *J* = 6.2 Hz), 75.46 (q, *J* = 52.5 Hz), 21.89; <sup>19</sup>F NMR (376 MHz, CDCl<sub>3</sub>) δ -49.59; IR (neat):  $\nu_{\max}$  = 2921, 2853, 2252, 1461, 1144 cm<sup>-1</sup>; LRMS *m/z* (EI) calc. for C<sub>10</sub>H<sub>7</sub>F<sub>3</sub> [M<sup>+</sup>] = 184.1, found 184.1; *R<sub>f</sub>* = 0.7 (hex).

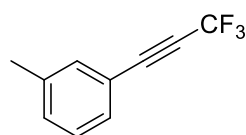

1-methyl-3-(3,3,3-trifluoroprop-1-yn-1-yl)benzene,<sup>S-10</sup> **3ac** was prepared according to general procedure: yellow oil; yield = 62%; <sup>1</sup>H NMR (400 MHz, CDCl<sub>3</sub>) δ 7.40 – 7.34 (m, 2H), 7.30 – 7.27 (m, 2H), 2.37 (s, 3H); <sup>13</sup>C NMR (101 MHz, CDCl<sub>3</sub>) δ 138.75, 133.13 (q, *J* = 1.5 Hz), 131.98, 129.76 (q, *J* = 1.5 Hz), 128.75, 118.55 (q, *J* = 1.8 Hz), 115.11 (q, *J* = 257.5 Hz), 87.03 (q, *J* = 6.6 Hz), 75.59 (q, *J* = 52.5 Hz), 21.35; <sup>19</sup>F NMR (376 MHz, CDCl<sub>3</sub>) δ -49.71; IR (neat):  $\nu_{\max}$  = 2980, 2925, 2889, 2233, 1319, 1143 cm<sup>-1</sup>; LRMS *m/z* (EI) calc. for C<sub>10</sub>H<sub>7</sub>F<sub>3</sub> [M<sup>+</sup>] = 184.1, found 184.1; *R<sub>f</sub>* = 0.7 (hex).

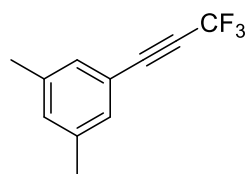

1,3-dimethyl-5-(3,3,3-trifluoroprop-1-yn-1-yl)benzene,<sup>S-11</sup> **3ad** was prepared according to general procedure: colorless oil; yield = 71%; <sup>1</sup>H NMR (400 MHz, CDCl<sub>3</sub>) δ 7.19 (s, 2H), 7.10 (s, 1H), 2.32 (s, 6H); <sup>13</sup>C NMR (101 MHz, CDCl<sub>3</sub>) δ 138.60, 133.00, 130.27 (q, *J* = 1.5 Hz), 118.33 (q, *J* = 1.8 Hz), 115.14 (q, *J* = 257.5 Hz), 87.31 (q, *J* = 6.2 Hz), 75.25 (q, *J* = 52.5 Hz), 21.24; <sup>19</sup>F NMR (376 MHz, CDCl<sub>3</sub>) δ -49.62; IR (neat):  $\nu_{\max}$  = 2988, 2872, 2251, 1392, 1142 cm<sup>-1</sup>; LRMS *m/z* (EI) calc. for C<sub>11</sub>H<sub>9</sub>F<sub>3</sub> [M<sup>+</sup>] = 198.1, found 198.1; *R<sub>f</sub>* = 0.6 (hex).

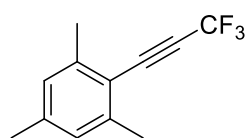

1,3,5-trimethyl-2-(3,3,3-trifluoroprop-1-yn-1-yl)benzene, **3ae** was prepared according to general procedure: white solid; yield = 78%; <sup>1</sup>H NMR (400 MHz, CDCl<sub>3</sub>) δ 6.90 (s, 2H), 2.41 (s, 6H), 2.31 (s, 3H); <sup>13</sup>C NMR (101 MHz, CDCl<sub>3</sub>) δ 142.08 (q, *J* = 1.5 Hz), 140.98, 128.19, 115.59 (q, *J* = 1.8 Hz), 115.51 (q, *J* = 257.1 Hz), 85.47 (q, *J* = 6.6 Hz), 83.13 (q, *J* = 52.1 Hz), 21.67, 20.77; <sup>19</sup>F NMR (376 MHz, CDCl<sub>3</sub>) δ -49.03; IR (neat):  $\nu_{\max}$  = 2988, 2872, 2251, 1142, 1066 cm<sup>-1</sup>; HRMS *m/z* (EI) calc. for C<sub>12</sub>H<sub>11</sub>F<sub>3</sub> [M<sup>+</sup>] = 212.0813, Found 212.0816; *R<sub>f</sub>* = 0.6 (hex).

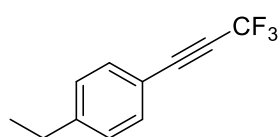

1-ethyl-4-(3,3,3-trifluoroprop-1-yn-1-yl)benzene,<sup>S-10</sup> **3af** was prepared according to general procedure: yellow oil; yield = 71%; <sup>1</sup>H NMR (400 MHz, CDCl<sub>3</sub>) δ 7.39 (d, *J* = 8.2 Hz, 2H), 7.14 (d, *J* = 8.2 Hz, 2H), 2.60 (q, *J* = 7.6 Hz, 2H), 1.17 (t, *J* = 7.6 Hz, 3H); <sup>13</sup>C NMR (101 MHz, CDCl<sub>3</sub>) δ 147.90, 132.69 (q, *J* = 1.5 Hz), 128.45, 115.85 (q, *J* = 1.8 Hz), 115.18 (q, *J* = 257.5 Hz), 87.19 (q, *J* = 6.6 Hz), 75.42 (q, *J* = 52.5 Hz), 29.18, 15.35; <sup>19</sup>F NMR (376 MHz, CDCl<sub>3</sub>) δ -49.58; IR (neat):  $\nu_{\max}$  = 2989, 2902, 2251, 1260, 1057 cm<sup>-1</sup>; LRMS *m/z* (EI) calc. for C<sub>11</sub>H<sub>9</sub>F<sub>3</sub> [M<sup>+</sup>] = 198.1, found 1.1; *R<sub>f</sub>* = 0.7 (hex).

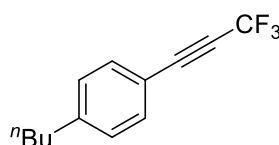

1-butyl-4-(3,3,3-trifluoroprop-1-yn-1-yl)benzene,<sup>S-10</sup> **3ag** was prepared according to general procedure: yellow oil; yield = 84%; <sup>1</sup>H NMR (400 MHz, CDCl<sub>3</sub>) δ 7.47 (d, *J* = 8.1 Hz, 2H), 7.20 (d, *J* = 8.1 Hz, 2H), 2.64 (t, *J* = 7.6 Hz, 2H), 1.60 (tt, *J* = 7.8, 7.6 Hz, 2H), 1.35 (qt, *J* = 7.8, 7.4 Hz, 2H), 0.93 (t, *J* = 7.4 Hz, 3H); <sup>13</sup>C NMR (101 MHz, CDCl<sub>3</sub>) δ 146.64, 132.60 (q, *J* = 1.5 Hz), 128.98, 115.81 (q, *J* = 1.8 Hz), 115.18 (q, *J* = 257.5 Hz), 87.21 (q, *J* = 6.6 Hz), 75.43 (q, *J* = 52.5 Hz), 35.93, 33.43, 22.49, 14.09; <sup>19</sup>F NMR (376 MHz, CDCl<sub>3</sub>) δ -49.57; IR (neat):  $\nu_{\max}$  = 2988, 2892, 2252, 1317, 1163 cm<sup>-1</sup>; LRMS *m/z* (EI) calc. for C<sub>13</sub>H<sub>13</sub>F<sub>3</sub> [M<sup>+</sup>] = 226.2, found 226.2; *R<sub>f</sub>* = 0.6 (hex).

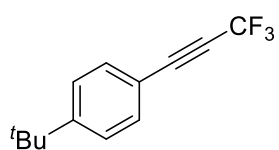

1-(tert-butyl)-4-(3,3,3-trifluoroprop-1-yn-1-yl)benzene,<sup>S-8</sup> **3ah** was prepared according to general procedure: yellow oil; yield = 79%; <sup>1</sup>H NMR (400 MHz, CDCl<sub>3</sub>) δ 7.49 (d, *J* = 8.5 Hz, 2H), 7.41 (d, *J* = 8.5 Hz, 2H), 1.33 (s, 9H); <sup>13</sup>C NMR (101 MHz, CDCl<sub>3</sub>) δ 154.75, 132.46 (q, *J* = 1.6 Hz), 125.91, 115.66 (q, *J* = 3.7 Hz), 115.18 (q, *J* = 257.5 Hz), 87.15 (q, *J* = 6.6 Hz), 75.43 (q, *J* = 52.5 Hz), 35.28, 31.26; <sup>19</sup>F NMR (376 MHz, CDCl<sub>3</sub>) δ -49.55; IR (neat):  $\nu_{\max}$  = 2967, 2872, 2252, 1317, 1135 cm<sup>-1</sup>; LRMS *m/z* (EI) calc. for C<sub>13</sub>H<sub>13</sub>F<sub>3</sub> [M<sup>+</sup>] = 226.2, found 226.2; *R<sub>f</sub>* = 0.7 (hex).

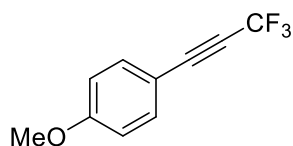

1-methoxy-4-(3,3,3-trifluoroprop-1-yn-1-yl)benzene,<sup>S-8</sup> **3ai** was prepared according to general procedure: yellow oil; yield = 52%; <sup>1</sup>H NMR (400 MHz, CDCl<sub>3</sub>) δ 7.49 (d, *J* = 8.8 Hz, 2H), 6.90 (d, *J* = 8.8 Hz, 2H), 3.84 (s,

3H);  $^{13}\text{C}$  NMR (101 MHz,  $\text{CDCl}_3$ )  $\delta$  161.75, 134.38 (q,  $J = 1.5$  Hz), 115.16 (q,  $J = 277.9$  Hz), 114.54, 110.54 (q,  $J = 1.8$  Hz), 87.26 (q,  $J = 6.5$  Hz), 75.02 (q,  $J = 52.3$  Hz), 55.62;  $^{19}\text{F}$  NMR (376 MHz,  $\text{CDCl}_3$ )  $\delta$  -49.39; IR (neat):  $\nu_{\text{max}} = 2988, 2927, 2841, 2249, 1607, 1511, 1130$   $\text{cm}^{-1}$ ; LRMS  $m/z$  (EI) calc. for  $\text{C}_{10}\text{H}_7\text{F}_3\text{O}$   $[M^+] = 200.0$ , found 200.0;  $R_f = 0.4$  (hex/ethyl acetate = 20/1).

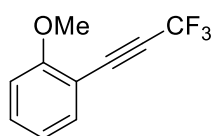

1-methoxy-2-(3,3,3-trifluoroprop-1-yn-1-yl)benzene,<sup>S-9</sup> **3aj** was prepared according to general procedure: yellow oil; yield = 77%;  $^1\text{H}$  NMR (400 MHz,  $\text{CDCl}_3$ )  $\delta$  7.49 (dd,  $J = 7.6, 1.4$  Hz, 1H), 7.43 (ddd,  $J = 8.5, 8.5, 1.4$  Hz, 1H), 6.95 (dd,  $J = 8.5, 7.6$  Hz, 1H), 6.92 (d,  $J = 8.5$  Hz, 1H), 3.90 (s, 3H);  $^{13}\text{C}$  NMR (101 MHz,  $\text{CDCl}_3$ )  $\delta$  161.49, 134.58 (q,  $J = 1.5$  Hz), 132.69, 120.74, 115.23 (q,  $J = 257.5$  Hz), 111.10, 108.02 (q,  $J = 1.8$  Hz), 83.93 (q,  $J = 6.6$  Hz), 79.56 (q,  $J = 52.5$  Hz), 56.04;  $^{19}\text{F}$  NMR (376 MHz,  $\text{CDCl}_3$ )  $\delta$  -49.44; IR (neat):  $\nu_{\text{max}} = 2928, 2832, 22505, 1494, 1318, 1127$   $\text{cm}^{-1}$ ; LRMS  $m/z$  (EI) calc. for  $\text{C}_{10}\text{H}_7\text{F}_3\text{O}$   $[M^+] = 200.0$ , found 200.0;  $R_f = 0.5$  (hex/ethyl acetate = 20/1).

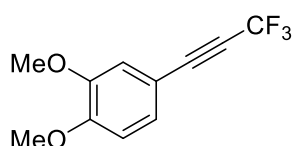

1,2-dimethoxy-4-(3,3,3-trifluoroprop-1-yn-1-yl)benzene, **3ak** was prepared according to general procedure: yellow oil; yield = 42%;  $^1\text{H}$  NMR (400 MHz,  $\text{CDCl}_3$ )  $\delta$  7.18 (dd,  $J = 8.3, 1.9$  Hz, 1H), 7.01 (d,  $J = 1.9$  Hz, 1H), 6.85 (d,  $J = 8.3$  Hz, 1H), 3.91 (s, 3H), 3.89 (s, 3H);  $^{13}\text{C}$  NMR (101 MHz,  $\text{CDCl}_3$ )  $\delta$  151.73, 149.06, 126.65 (q,  $J = 1.5$  Hz), 115.23 (q,  $J = 257.5$  Hz), 114.76 (q,  $J = 1.8$  Hz), 111.25, 110.56, 87.31 (q,  $J = 6.2$  Hz), 74.80 (q,  $J = 52.5$  Hz), 56.24, 56.20;  $^{19}\text{F}$  NMR (376 MHz,  $\text{CDCl}_3$ )  $\delta$  -49.40; IR (neat):  $\nu_{\text{max}} = 2935, 2850, 2239, 1515, 1253, 1128$   $\text{cm}^{-1}$ ; HRMS  $m/z$  (EI) calc. for  $\text{C}_{11}\text{H}_9\text{F}_3\text{O}_2$   $[M^+] = 230.0555$ , Found 230.0556;  $R_f = 0.3$  (hex/ethyl acetate = 20/1).

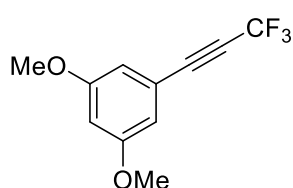

1,3-dimethoxy-5-(3,3,3-trifluoroprop-1-yn-1-yl)benzene,<sup>S-12</sup> **3al** was prepared according to general procedure: yellow oil; yield = 49%;  $^1\text{H}$  NMR (400 MHz,  $\text{CDCl}_3$ )  $\delta$  6.69 (d,  $J = 2.3$  Hz, 2H), 6.56 (t,  $J = 2.3$  Hz, 1H), 3.80 (s, 6H);  $^{13}\text{C}$  NMR (101 MHz,  $\text{CDCl}_3$ )  $\delta$  160.90, 119.86 (q,  $J = 1.8$  Hz), 114.99 (q,  $J = 257.8$  Hz), 110.32 (q,  $J = 1.5$  Hz), 104.43, 86.70 (q,  $J = 6.6$  Hz), 75.24 (q,  $J = 52.9$  Hz), 55.75;  $^{19}\text{F}$  NMR (376 MHz,  $\text{CDCl}_3$ )  $\delta$  -49.79; IR (neat):  $\nu_{\text{max}} = 3010, 2940, 2837, 2250, 1593, 1262, 1137$   $\text{cm}^{-1}$ ; LRMS  $m/z$  (EI) calc. for  $\text{C}_{11}\text{H}_9\text{F}_3\text{O}_2$   $[M^+] = 230.2$ , found 230.2;  $R_f = 0.4$  (hex/ethyl acetate = 20/1).

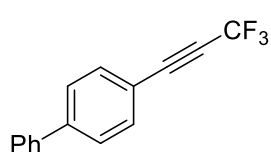

4-(3,3,3-trifluoroprop-1-yn-1-yl)-1,1'-biphenyl,<sup>S-8</sup> **3am** was prepared according to general procedure: white solid; yield = 75%;  $^1\text{H}$  NMR (400 MHz,  $\text{CDCl}_3$ )  $\delta$  7.66 – 7.62 (m, 4H), 7.61 (d,  $J = 8.0$  Hz, 2H), 7.48 (dd,  $J = 8.0, 7.0$  Hz, 2H), 7.41 (t,  $J = 7.0$  Hz, 1H);  $^{13}\text{C}$  NMR (101 MHz,  $\text{CDCl}_3$ )  $\delta$  143.92, 139.89, 133.11 (q,  $J = 1.5$

Hz), 129.22, 128.45, 127.51, 127.35; 117.41 (q,  $J = 1.8$  Hz), 115.13 (q,  $J = 257.5$  Hz), 86.76 (q,  $J = 6.6$  Hz), 76.42 (q,  $J = 52.5$  Hz);  $^{19}\text{F}$  NMR (376 MHz,  $\text{CDCl}_3$ )  $\delta$  -49.66; IR (neat):  $\nu_{\text{max}} = 3037, 2927, 2855, 2253, 1485, 1318, 1123$   $\text{cm}^{-1}$ ; LRMS  $m/z$  (EI) calc. for  $\text{C}_{15}\text{H}_9\text{F}_3$  [ $\text{M}^+$ ] = 246.1, found 246.1;  $R_f = 0.4$  (hex).

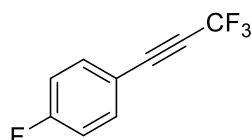

1-fluoro-4-(3,3,3-trifluoroprop-1-yn-1-yl)benzene,<sup>S-9</sup> **3an** was prepared according to general procedure: yellow oil; yield = 92%;  $^1\text{H}$  NMR (400 MHz,  $\text{CDCl}_3$ )  $\delta$  7.56 (dd,  $J = 8.6, 5.2$  Hz, 2H), 7.10 (dd,  $J = 8.6$  Hz, 8.6 Hz, 2H);  $^{13}\text{C}$  NMR (101 MHz,  $\text{CDCl}_3$ )  $\delta$  164.23 (d,  $J = 254.6$  Hz), 134.93 (dq,  $J = 9.0, 1.5$  Hz), 116.45 (d,  $J = 22.3$  Hz), 114.82 (q,  $J = 1.8$  Hz), 114.98 (q,  $J = 257.8$  Hz), 85.72 (q,  $J = 6.6$  Hz), 76.36 (q,  $J = 52.8$  Hz);  $^{19}\text{F}$  NMR (376 MHz,  $\text{CDCl}_3$ )  $\delta$  -49.89 (s, 3F), -106.07 (s, 1F); IR (neat):  $\nu_{\text{max}} = 2987, 2925, 2250, 1392, 1143, 1066$   $\text{cm}^{-1}$ ; LRMS  $m/z$  (EI) calc. for  $\text{C}_9\text{H}_4\text{F}_4$  [ $\text{M}^+$ ] = 188.0, found 188.0;  $R_f = 0.7$  (hex).

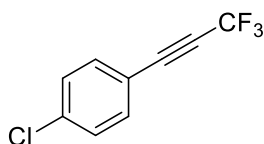

1-chloro-4-(3,3,3-trifluoroprop-1-yn-1-yl)benzene,<sup>S-13</sup> **3ao** was prepared according to general procedure: yellow oil; yield = 90%;  $^1\text{H}$  NMR (400 MHz,  $\text{CDCl}_3$ )  $\delta$  7.49 (d,  $J = 8.5$  Hz, 2H), 7.38 (d,  $J = 8.5$  Hz, 2H);  $^{13}\text{C}$  NMR (101 MHz,  $\text{CDCl}_3$ )  $\delta$  137.59, 133.87 (q,  $J = 1.5$  Hz), 129.37, 117.10 (q,  $J = 1.8$  Hz), 114.93 (q,  $J = 258.2$  Hz), 85.52 (q,  $J = 6.2$  Hz), 76.76 (q,  $J = 52.9$  Hz);  $^{19}\text{F}$  NMR (376 MHz,  $\text{CDCl}_3$ )  $\delta$  -50.02; IR (neat):  $\nu_{\text{max}} = 2987, 2902, 2251, 1289, 1066$   $\text{cm}^{-1}$ ; LRMS  $m/z$  (EI) calc. for  $\text{C}_9\text{H}_4\text{ClF}_3$  [ $\text{M}^+$ ] = 204.0, found 204.0;  $R_f = 0.7$  (hex).

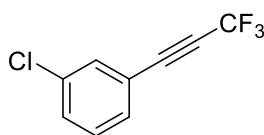

1-chloro-3-(3,3,3-trifluoroprop-1-yn-1-yl)benzene,<sup>S-8</sup> **3ap** was prepared according to general procedure: yellow oil; yield = 85%;  $^1\text{H}$  NMR (400 MHz,  $\text{CDCl}_3$ )  $\delta$  7.56 (dd,  $J = 2.4, 1.6$  Hz, 1H), 7.46 (ddd,  $J = 7.9, 2.4, 1.2$  Hz, 1H), 7.45 (ddd,  $J = 7.9, 1.6, 1.2$  Hz, 1H), 7.34 (dd,  $J = 7.9, 7.9$  Hz, 1H);  $^{13}\text{C}$  NMR (101 MHz,  $\text{CDCl}_3$ )  $\delta$  134.90, 132.47 (q,  $J = 1.5$  Hz), 131.49, 130.77 (q,  $J = 1.5$  Hz), 130.18, 120.39 (q,  $J = 1.8$  Hz), 114.83 (q,  $J = 258.6$  Hz), 85.00 (q,  $J = 6.6$  Hz), 77.30 (q,  $J = 53.2$  Hz);  $^{19}\text{F}$  NMR (376 MHz,  $\text{CDCl}_3$ )  $\delta$  -50.15; IR (neat):  $\nu_{\text{max}} = 2955, 2924, 2854, 2247, 1462, 1261$   $\text{cm}^{-1}$ ; LRMS  $m/z$  (EI) calc. for  $\text{C}_9\text{H}_4\text{ClF}_3$  [ $\text{M}^+$ ] = 204.0, found 204.0;  $R_f = 0.7$  (hex).

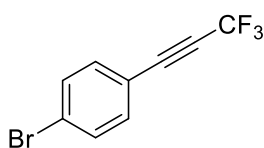

1-bromo-4-(3,3,3-trifluoroprop-1-yn-1-yl)benzene,<sup>S-8</sup> **3aq** was prepared according to general procedure: yellow oil; yield = 91%;  $^1\text{H}$  NMR (400 MHz,  $\text{CDCl}_3$ )  $\delta$  7.55 (d,  $J = 8.5$  Hz, 2H), 7.42 (d,  $J = 8.5$  Hz, 2H);  $^{13}\text{C}$  NMR (101 MHz,  $\text{CDCl}_3$ )  $\delta$  133.97 (q,  $J = 1.8$  Hz), 132.30, 125.95, 117.62 (q,  $J = 1.9$  Hz), 114.94 (q,  $J = 258.2$  Hz), 85.58 (q,  $J = 6.6$  Hz), 76.88 (q,  $J = 52.9$  Hz);  $^{19}\text{F}$  NMR (376 MHz,  $\text{CDCl}_3$ )  $\delta$  -50.05; IR (neat):

$\nu_{\max} = 2930, 2883, 2255, 1487, 1310, 1128 \text{ cm}^{-1}$ ; **LRMS**  $m/z$  (EI) calc. for  $\text{C}_9\text{H}_4\text{BrF}_3$   $[\text{M}^+] = 248.1$ , found 248.1;  $R_f = 0.7$  (hex).

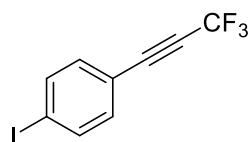

1-iodo-4-(3,3,3-trifluoroprop-1-yn-1-yl)benzene,<sup>S-9</sup> **3ar** was prepared according to general procedure: white solid; yield = 53%;  **$^1\text{H}$  NMR (400 MHz,  $\text{CDCl}_3$ )**  $\delta$  7.76 (d,  $J = 8.4$  Hz, 2H), 7.27 (d,  $J = 8.4$  Hz, 2H);  **$^{13}\text{C}$  NMR (101 MHz,  $\text{CDCl}_3$ )**  $\delta$  138.19, 133.86 (q,  $J = 1.5$  Hz), 118.13 (q,  $J = 1.8$  Hz), 114.93 (q,  $J = 258.2$  Hz), 97.97, 85.73 (q,  $J = 6.6$  Hz), 77.07 (q,  $J = 52.9$  Hz);  **$^{19}\text{F}$  NMR (376 MHz,  $\text{CDCl}_3$ )**  $\delta$  -50.05; **IR (neat):**  $\nu_{\max} = 2925, 2854, 2255, 1486, 1312, 1142 \text{ cm}^{-1}$ ; **LRMS**  $m/z$  (EI) calc. for  $\text{C}_9\text{H}_4\text{F}_3\text{I}$   $[\text{M}^+] = 296.0$ , found 296.0;  $R_f = 0.5$  (hex).

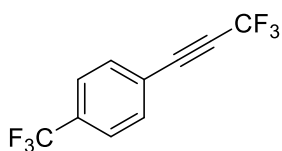

1-(trifluoromethyl)-4-(3,3,3-trifluoroprop-1-yn-1-yl)benzene,<sup>S-9</sup> **3as** was prepared according to general procedure: colorless oil; yield = 90%;  **$^1\text{H}$  NMR (400 MHz,  $\text{CDCl}_3$ )**  $\delta$  7.69 (d,  $J = 8.8$  Hz, 2H), 7.67 (d,  $J = 8.8$  Hz, 2H);  **$^{13}\text{C}$  NMR (101 MHz,  $\text{CDCl}_3$ )**  $\delta$  133.04 (q,  $J = 1.5$  Hz), 132.88 (q,  $J = 33.5$  Hz), 125.88 (q,  $J = 3.8$  Hz), 123.65 (q,  $J = 273.5$  Hz), 122.97 (q,  $J = 1.8$  Hz), 114.75 (q,  $J = 258.2$  Hz), 84.81 (q,  $J = 6.2$  Hz), 77.72 (q,  $J = 53.0$  Hz);  **$^{19}\text{F}$  NMR (376 MHz,  $\text{CDCl}_3$ )**  $\delta$  -50.32 (s, 3F), -63.27 (s, 3F); **IR (neat):**  $\nu_{\max} = 2977, 2930, 2887, 2251, 1316, 1135 \text{ cm}^{-1}$ ; **LRMS**  $m/z$  (EI) calc. for  $\text{C}_{10}\text{H}_4\text{F}_6$   $[\text{M}^+] = 238.0$ , found 238.0;  $R_f = 0.8$  (hex).

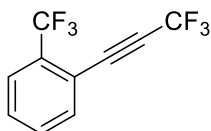

1-(trifluoromethyl)-2-(3,3,3-trifluoroprop-1-yn-1-yl)benzene, **3at** was prepared according to general procedure: colorless oil; yield = 91%;  **$^1\text{H}$  NMR (400 MHz,  $\text{CDCl}_3$ )**  $\delta$  7.76 – 7.69 (m, 2H), 7.63 – 7.56 (m, 2H);  **$^{13}\text{C}$  NMR (101 MHz,  $\text{CDCl}_3$ )**  $\delta$  135.07 (q,  $J = 1.8$  Hz), 133.17 (qq,  $J = 31.8, 1.1$  Hz), 131.94 (q,  $J = 1.1$  Hz), 131.04, 126.50 (q,  $J = 4.9$  Hz), 123.11 (q,  $J = 274.2$  Hz), 116.83 (qq,  $J = 2.5, 1.8$  Hz), 114.80 (q,  $J = 258.6$  Hz), 83.86 (q,  $J = 6.4$  Hz), 80.51 (qq,  $J = 53.6, 1.1$  Hz);  **$^{19}\text{F}$  NMR (376 MHz,  $\text{CDCl}_3$ )**  $\delta$  -50.78 (s, 3F), -62.18 (s, 3F); **IR (neat):**  $\nu_{\max} = 2929, 2890, 2251, 1317, 1164 \text{ cm}^{-1}$ ; **LRMS**  $m/z$  (EI) calc. for  $\text{C}_{10}\text{H}_4\text{F}_6$   $[\text{M}^+] = 238.0$ , found 238.0;  $R_f = 0.8$  (hex).

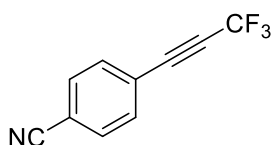

4-(3,3,3-trifluoroprop-1-yn-1-yl)benzonitrile,<sup>S-12</sup> **3au** was prepared according to general procedure: yellow oil; yield = 79%;  **$^1\text{H}$  NMR (400 MHz,  $\text{CDCl}_3$ )**  $\delta$  7.71 (d,  $J = 8.6$  Hz, 2H), 7.67 (d,  $J = 8.6$  Hz, 2H);  **$^{13}\text{C}$  NMR (101 MHz,  $\text{CDCl}_3$ )**  $\delta$  133.20 (q,  $J = 1.5$  Hz), 132.53, 123.34 (q,  $J = 1.8$  Hz), 117.84, 114.79, 114.62 (q,  $J = 258.9$  Hz), 84.21 (q,  $J = 6.6$  Hz), 79.08 (q,  $J = 53.6$  Hz);  **$^{19}\text{F}$  NMR (376 MHz,  $\text{CDCl}_3$ )**  $\delta$  -50.51; **IR (neat):**  $\nu_{\max} = 2998, 2918, 2259, 2233, 1503, 1310, 1140 \text{ cm}^{-1}$ ; **LRMS**  $m/z$  (EI) calc. for  $\text{C}_{10}\text{H}_4\text{F}_3\text{N}$   $[\text{M}^+] = 195.1$ , found 195.1;  $R_f = 0.4$  (hex/ethyl acetate = 20/1).

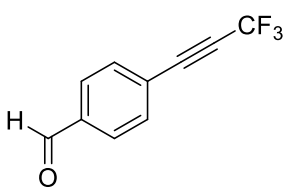
 4-(3,3,3-trifluoroprop-1-yn-1-yl)benzaldehyde,<sup>S-13</sup> **3av** was prepared according to general procedure: yellow oil; yield = 81%; <sup>1</sup>H NMR (400 MHz, CDCl<sub>3</sub>) δ 10.06 (s, 1H), 7.92 (d, *J* = 8.3 Hz, 2H), 7.73 (d, *J* = 8.3 Hz, 2H); <sup>13</sup>C NMR (101 MHz, CDCl<sub>3</sub>) δ 191.21, 137.60, 133.29 (q, *J* = 1.5 Hz), 129.80, 124.45 (q, *J* = 1.8 Hz), 114.76 (q, *J* = 258.6 Hz), 85.11 (q, *J* = 6.6 Hz), 78.60 (q, *J* = 53.2 Hz); <sup>19</sup>F NMR (376 MHz, CDCl<sub>3</sub>) δ -50.33; IR (neat): ν<sub>max</sub> = 2920, 2851, 2256, 1705, 1308, 1135 cm<sup>-1</sup>; LRMS m/z (EI) calc. for C<sub>10</sub>H<sub>5</sub>F<sub>3</sub>O [M<sup>+</sup>] = 198.3, found 198.3; *R*<sub>f</sub> = 0.3 (hex/ethyl acetate = 10/1).

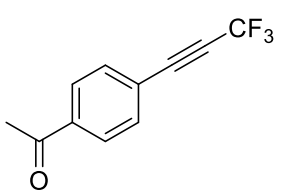
 1-(4-(3,3,3-trifluoroprop-1-yn-1-yl)phenyl)ethan-1-one,<sup>S-14</sup> **3aw** was prepared according to general procedure: yellow oil; yield = 79%; <sup>1</sup>H NMR (400 MHz, CDCl<sub>3</sub>) δ 7.97 (d, *J* = 8.4 Hz, 2H), 7.66 (d, *J* = 8.4 Hz, 2H), 2.62 (s, 3H); <sup>13</sup>C NMR (101 MHz, CDCl<sub>3</sub>) δ 197.14, 138.59, 132.90 (q, *J* = 1.5 Hz), 128.56, 123.14 (q, *J* = 1.8 Hz), 114.81 (q, *J* = 258.2 Hz), 85.38 (q, *J* = 6.6 Hz), 78.15 (q, *J* = 53.2 Hz), 26.90; <sup>19</sup>F NMR (376 MHz, CDCl<sub>3</sub>) δ -50.22; IR (neat): ν<sub>max</sub> = 2979, 2927, 2878, 2259, 1682, 1313, 1130 cm<sup>-1</sup>; LRMS m/z (EI) calc. for C<sub>11</sub>H<sub>7</sub>F<sub>3</sub>O [M<sup>+</sup>] = 212.1, found 212.1; *R*<sub>f</sub> = 0.4 (hex/ethyl acetate = 10/1).

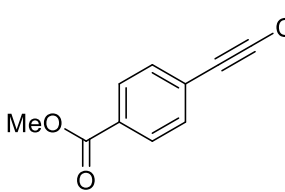
 Methyl 4-(3,3,3-trifluoroprop-1-yn-1-yl)benzoate,<sup>S-15</sup> **3ax** was prepared according to general procedure: yellow oil; yield = 83%; <sup>1</sup>H NMR (400 MHz, CDCl<sub>3</sub>) δ 8.06 (d, *J* = 8.4 Hz, 2H), 7.63 (d, *J* = 8.4 Hz, 2H), 3.94 (s, 3H); <sup>13</sup>C NMR (101 MHz, CDCl<sub>3</sub>) δ 166.16, 132.65 (q, *J* = 1.5 Hz), 132.31, 129.91, 123.06 (q, *J* = 1.8 Hz), 114.83 (q, *J* = 258.6 Hz), 85.47 (q, *J* = 6.2 Hz), 77.96 (q, *J* = 52.9 Hz), 52.72; <sup>19</sup>F NMR (376 MHz, CDCl<sub>3</sub>) δ -50.20; IR (neat): ν<sub>max</sub> = 2988, 2987, 2251, 1649, 1277, 1056 cm<sup>-1</sup>; LRMS m/z (EI) calc. for C<sub>11</sub>H<sub>7</sub>F<sub>3</sub>O<sub>2</sub> [M<sup>+</sup>] = 228.0, found 228.0; *R*<sub>f</sub> = 0.4 (hex/ethyl acetate = 15/1).

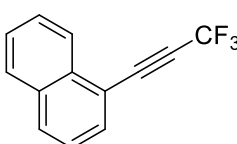
 1-(3,3,3-trifluoroprop-1-yn-1-yl)naphthalene,<sup>S-8</sup> **3b** was prepared according to general procedure: yellow oil; yield = 85%; <sup>1</sup>H NMR (600 MHz, CDCl<sub>3</sub>) δ 8.23 (d, *J* = 8.4 Hz, 1H), 7.98 (d, *J* = 8.2 Hz, 1H), 7.90 (d, *J* = 8.2 Hz, 1H), 7.82 (d, *J* = 7.1 Hz, 1H), 7.65 (ddd, *J* = 8.3, 6.8, 1.2 Hz, 1H), 7.58 (ddd, *J* = 1.2, 6.8, 8.1 Hz, 1H), 7.48 (dd, *J* = 7.1, 8.3 Hz, 1H); <sup>13</sup>C NMR (151 MHz, CDCl<sub>3</sub>) δ 133.37 (q, *J* = 1.5 Hz), 132.74 (q, *J* = 1.8 Hz), 133.20, 131.75, 128.81, 128.05, 127.26, 125.53, 125.21, 116.21 (q, *J* = 1.8 Hz), 115.28 (q, *J* = 257.2 Hz), 85.38 (q, *J* = 6.4 Hz), 80.37 (q, *J* = 52.7 Hz); <sup>19</sup>F NMR (564 MHz, CDCl<sub>3</sub>) δ -49.47; IR (neat): ν<sub>max</sub> = 3086, 2927, 2878, 2244, 1311, 1133 cm<sup>-1</sup>; LRMS m/z (EI) calc. for C<sub>13</sub>H<sub>7</sub>F<sub>3</sub> [M<sup>+</sup>] = 220.1, found 220.1; *R*<sub>f</sub> = 0.5 (hex/ethyl acetate = 50/1).



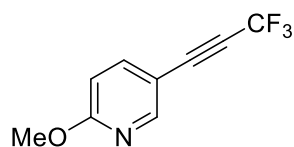

2-methoxy-5-(3,3,3-trifluoroprop-1-yn-1-yl)pyridine, **3c** was prepared according to general procedure: yellow oil; yield = 75%; <sup>1</sup>H NMR (400 MHz, CDCl<sub>3</sub>) δ 8.38 (d, *J* = 2.4 Hz, 1H), 7.69 (dd, *J* = 8.6, 2.4 Hz, 1H), 6.76 (d, *J* = 8.6 Hz, 1H), 3.97 (s, 3H); <sup>13</sup>C NMR (101 MHz, CDCl<sub>3</sub>) δ 165.17, 151.96 (q, *J* = 1.5 Hz), 141.76 (q, *J* = 1.5 Hz), 115.01 (q, *J* = 257.8 Hz), 111.46, 108.56 (q, *J* = 1.8 Hz), 84.38 (q, *J* = 6.4 Hz), 77.13 (q, *J* = 52.6 Hz), 54.22; <sup>19</sup>F NMR (376 MHz, CDCl<sub>3</sub>) δ -49.82; IR (neat): ν<sub>max</sub> = 2988, 2871, 2251, 1392, 1261, 1142 cm<sup>-1</sup>; HRMS *m/z* (EI) calc. for C<sub>9</sub>H<sub>6</sub>F<sub>3</sub>NO [M<sup>+</sup>] = 201.0401, Found 201.0400; *R<sub>f</sub>* = 0.4 (hex/ethyl acetate = 30/1).

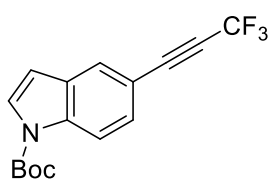

tert-butyl 5-(3,3,3-trifluoroprop-1-yn-1-yl)-1*H*-indole-1-carboxylate, **3d** was prepared according to general procedure: yellow oil; yield = 60%; <sup>1</sup>H NMR (400 MHz, CDCl<sub>3</sub>) δ 8.17 (d, *J* = 8.6 Hz, 1H), 7.79 (d, *J* = 1.6 Hz, 1H), 7.65 (d, *J* = 3.7 Hz, 1H), 7.48 (dd, *J* = 8.6, 1.6 Hz, 1H), 6.58 (d, *J* = 3.7 Hz, 1H), 1.68 (s, 9H); <sup>13</sup>C NMR (101 MHz, CDCl<sub>3</sub>) δ 149.47, 136.41, 130.68, 128.27 (q, *J* = 1.5 Hz), 127.72, 126.04 (q, *J* = 1.8 Hz), 115.77, 115.26 (q, *J* = 259.3 Hz), 112.60 (q, *J* = 1.8 Hz), 107.19, 87.92 (q, *J* = 6.4 Hz), 84.76, 74.85 (q, *J* = 52.5 Hz), 28.36; <sup>19</sup>F NMR (376 MHz, CDCl<sub>3</sub>) δ -49.41; IR (neat): ν<sub>max</sub> = 3012, 2989, 2866, 2253, 1691, 1481, 1361, 1153 cm<sup>-1</sup>; HRMS *m/z* (EI) calc. for C<sub>16</sub>H<sub>14</sub>F<sub>3</sub>NO<sub>2</sub> [M<sup>+</sup>] = 309.0929, Found 309.0974; *R<sub>f</sub>* = 0.45 (hex/ethyl acetate = 10/1).

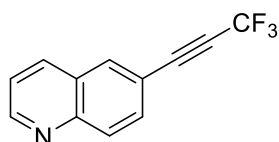

6-(3,3,3-trifluoroprop-1-yn-1-yl)quinoline, **3e** was prepared according to general procedure: white solid; yield = 75%; <sup>1</sup>H NMR (400 MHz, CDCl<sub>3</sub>) δ 8.98 (dd, *J* = 4.3, 1.8 Hz, 1H), 8.15 (dd, *J* = 8.4, 1.8 Hz, 1H), 8.11 (d, *J* = 8.8 Hz, 1H), 8.10 (d, *J* = 1.8 Hz, 1H), 7.77 (dd, *J* = 8.8, 1.8 Hz, 1H), 7.47 (dd, *J* = 8.4, 4.3 Hz, 1H); <sup>13</sup>C NMR (101 MHz, CDCl<sub>3</sub>) δ 136.31, 133.71 (q, *J* = 1.5 Hz), 131.60 (q, *J* = 1.2 Hz), 130.48, 127.87, 122.49, 116.87 (q, *J* = 2.3 Hz), 114.95 (q, *J* = 258.2 Hz), 86.11 (q, *J* = 6.6 Hz), 76.70 (q, *J* = 52.9 Hz); <sup>19</sup>F NMR (376 MHz, CDCl<sub>3</sub>) δ -49.92; IR (neat): ν<sub>max</sub> = 2993, 2879, 2250, 1481, 1370, 1161 cm<sup>-1</sup>; HRMS *m/z* (EI) calc. for C<sub>12</sub>H<sub>6</sub>F<sub>3</sub>N [M<sup>+</sup>] = 221.0452, Found 221.0452; *R<sub>f</sub>* = 0.45 (hex/ethyl acetate = 3/1).

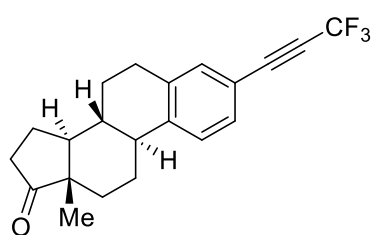

(8*R*,9*S*,13*S*,14*S*)-13-methyl-3-(3,3,3-trifluoroprop-1-yn-1-yl)-6,7,8,9,11,12,13,14,15,16-decahydro-17*H*-cyclopenta[*a*]phenanthren-17-one, **3f** was prepared according to the procedure, using a divided cell: pale yellow oil; yield = 70%; <sup>1</sup>H NMR (400 MHz, CDCl<sub>3</sub>) δ 7.33 – 7.27 (m, 2H), 7.27 – 7.21 (m, 1H), 2.96 – 2.85 (m, 2H), 2.52 (dd, *J* = 18.7, 9.0 Hz, 1H), 2.46 – 2.38 (m, 1H), 2.37 – 2.26 (m, 1H),

2.24 – 1.93 (m, 4H), 1.65 – 1.44 (m, 6H), 0.92 (s, 3H);  $^{13}\text{C}$  NMR (101 MHz,  $\text{CDCl}_3$ )  $\delta$  220.69, 143.45, 137.40, 133.12 (q,  $J = 1.8$  Hz), 129.89 (q,  $J = 1.5$  Hz), 125.95, 115.95 (q,  $J = 2.2$  Hz), 115.13 (q,  $J = 257.3$  Hz), 87.12 (q,  $J = 6.5$  Hz), 75.37 (q,  $J = 52.1$  Hz), 50.69, 48.09, 44.74, 37.97, 36.01, 31.71, 29.21, 26.35, 25.71, 21.78, 14.02;  $^{19}\text{F}$  NMR (376 MHz,  $\text{CDCl}_3$ )  $\delta$  -49.54; IR (neat):  $\nu_{\text{max}} = 3011, 2933, 2870, 2251, 1739, 1322, 1198, 1136$   $\text{cm}^{-1}$ ; HRMS  $m/z$  (EI) calc. for  $\text{C}_{21}\text{H}_{21}\text{F}_3\text{O}$  [ $\text{M}^+$ ] = 346.1544, Found 346.1547;  $R_f = 0.3$  (hex/ethyl acetate = 5/1).

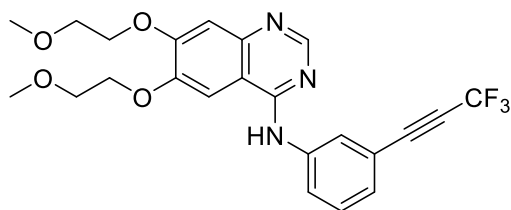

6,7-bis(2-methoxyethoxy)-*N*-(3-(3,3,3-trifluoroprop-1-yn-1-yl)phenyl)quinazolin-4-amine, **3g** was prepared according to the procedure, using a divided cell: pale yellow oil; yield = 50%;  $^1\text{H}$  NMR (400 MHz,  $\text{CDCl}_3$ )  $\delta$  8.62 (d,  $J = 12.0$  Hz, 1H), 7.86 – 7.83 (m, 1H), 7.74 (d,  $J = 8.1$  Hz, 1H), 7.40 – 7.23 (m, 3H), 7.15 (d,  $J = 2.8$  Hz, 1H), 4.25 – 4.21 (m, 2H), 4.20 – 4.16 (m, 2H), 3.80 – 3.78 (m, 2H), 3.78 – 3.76 (m, 2H), 3.42 (s, 3H), 3.41 (s, 3H);  $^{13}\text{C}$  NMR (101 MHz,  $\text{CDCl}_3$ )  $\delta$  156.57, 154.84, 153.38, 149.04, 147.02, 138.97, 129.17, 127.96 (q,  $J = 1.1$  Hz), 125.29 (q,  $J = 1.1$  Hz), 124.31, 122.65, 119.24 (q,  $J = 1.8$  Hz), 114.99 (q,  $J = 257.2$  Hz), 109.27 (q,  $J = 2.4$  Hz), 102.82, 86.53 (q,  $J = 6.5$  Hz), 75.87 (q,  $J = 52.5$  Hz), 71.11, 70.57, 69.29, 68.49, 59.47, 59.40;  $^{19}\text{F}$  NMR (376 MHz,  $\text{CDCl}_3$ )  $\delta$  -49.77; IR (neat):  $\nu_{\text{max}} = 3292, 2998, 2926, 2850, 2246, 1163, 1532, 1432, 1242, 1130$   $\text{cm}^{-1}$ ; HRMS  $m/z$  (EI) calc. for  $\text{C}_{23}\text{H}_{22}\text{F}_3\text{N}_3\text{O}_4$  [ $\text{M}^+$ ] = 461.1562, Found 461.1560;  $R_f = 0.3$  (hex/ethyl acetate = 1/4).

## References

- S-1 Frisch, M. J.; Trucks, G. W.; Schlegel, H. B.; Scuseria, G. E.; Robb, M. A.; Cheeseman, J. R.; Scalmani, G.; Barone, V.; Mennucci, B.; Petersson, G. A.; Nakatsuji, H.; Caricato, M.; Li, X.; Hratchian, H. P.; Izmaylov, A. F.; Bloino, J.; Zheng, G.; Sonnenberg, J. L.; Hada, M.; Ehara, M.; Toyota, K.; Fukuda, R.; Hasegawa, J.; Ishida, M.; Nakajima, T.; Honda, Y.; Kitao, O.; Nakai, H.; Vreven, T.; Montgomery Jr., J. A.; Peralta, J. E.; Ogliaro, F.; Bearpark, M.; Heyd, J. J.; Brothers, E.; Kudin, K. N.; Staroverov, V. N.; Kobayashi, R.; Normand, J.; Raghavachari, K.; Rendell, A.; Burant, J. C.; Iyengar, S. S.; Tomasi, J.; Cossi, M.; Rega, N.; Millam, J. M.; Klene, M.; Knox, J. E.; Cross, J. B.; Bakken, V.; Adamo, C.; Jaramillo, J.; Gomperts, R.; Stratmann, R. E.; Yazyev, O.; Austin, A. J.; Cammi, R.; Pomelli, C.; Ochterski, J. W.; Martin, R. L.; Morokuma, K.; Zakrzewski, V. G.; Voth, G. A.; Salvador, P.; Dannenberg, J. J.; Dapprich, S.; Daniels, A. D.; Farkas, O.; Foresman, J. B.; Ortiz, J. V.; Cioslowski, J.; Fox, D. J. Gaussian 09, Revision D01; Gaussian, Inc., Wallingford, CT, **2016**.
- S-2 Zhao, Y.; Truhlar, D. G. The M06 suite of density functionals for main group thermochemistry, thermochemical kinetics, noncovalent interactions, excited states, and transition elements: two new functionals and systematic testing of four M06-class functionals and 12 other functionals. *Theor. Chem. Acc.* **2008**, *120*, 215-241.
- S-3 Schaefer, A.; Huber, C.; Ahlrichs, R. Fully optimized contracted Gaussian-basis sets of triple zeta valence quality for atoms Li to Kr. *J. Chem. Phys.*, **1994**, *100*, 5829-5835.

- S-4 Weigend, F.; Ahlrichs, R. Balanced basis sets of split valence, triple zeta valence and quadruple zeta valence quality for H to Rn: Design and assessment of accuracy *Phys. Chem. Chem. Phys.* **2005**, *7*, 3297-3305.
- S-5 Tomasi, J.; Mennucci, B.; Cammi, R. Quantum Mechanical Continuum Solvation Models. *Chem. Rev.* **2005**, *105*, 2999-3094.
- S-6 GaussView, Version 6, Dennington, Roy; Keith, Todd; Millam, John. Semichem Inc., Shawnee Mission, KS, **2016**.
- S-7 CYLview20; Legault, C. Y., Université de Sherbrooke, **2020** (<http://www.cylview.org>)
- S-8 Chu, L.; Qung, F.-L. Copper-Mediated Aerobic Oxidative Trifluoromethylation of Terminal Alkynes with Me<sub>3</sub>SiCF<sub>3</sub>. *J. Am. Chem. Soc.* **2010**, *132*, 7262-7263.
- S-9 He, L.; Tsui, G. C. Fluoroform-Derived CuCF<sub>3</sub> for Trifluoromethylation of Terminal and TMS-Protected Alkynes. *Org. Lett.* **2016**, *18*, 2800-2803.
- S-10 Weng, Z.; Li, H.; He, W.; Yao, L.-F.; Tan, J.; Chen, J.; Yuan, Y.; Huang, K.-W. Mild Copper-Catalyzed Trifluoromethylation of Terminal Alkynes using an Electrophilic Trifluoromethylating Reagent. *Tetrahedron* **2012**, *68*, 2527-2531.
- S-11 Minakawa, M.; Ishikawa, T.; Namioka, J.; Hirooka, S.; Zhou, B.; Kawatsura, M. Iron-Catalyzed [2 + 2 + 2] Cycloaddition of Trifluoromethyl Group Substituted Unsymmetrical Internal Alkynes. *RSC Adv.* **2014**, *4*, 41353-41356.
- S-12 Wu, H.; Chen, S.; Xiao, D.; Li, F.; Zhou, K.; Yin, X.; Liu, C.; He, X.; Shang, Y. Visible-Light-Mediated Deacylated Alkynylation of Unstrained Ketone. *Org. Lett.* **2023**, *25*, 1166-1171.
- S-13 Zhang, S.-L.; Xiao, C.; Wang, H.-X. Diverse Copper(III) Trifluoromethyl Complexes with mono-, bi- and tridentate Ligands and Their Versatile Reactivity. *Dalton Trans.* **2018**, *47*, 4779-4784.
- S-14 Yang, L.; Jiang, L.; Li, Y.; Fu, X.; Zhang, R.; Jin, K.; Duan, C. Cu(I)/Ag(I)-Mediated Decarboxylating Trifluoromethylation of Arylpropionic Acids with Me<sub>3</sub>SiCF<sub>3</sub> at Room Temperature. *Tetrahedron* **2016**, *72*, 3858-3862.
- S-15 Shi, X.; Yu, B.; Zhou, X.; Yang, Y. Photoinduced Selective Perfluoroalkylation of Terminal Alkynes via Electron Donor-Acceptor Complexes. *Chem. Commun.* **2024**, *60*, 2532-2535.

# NMR Spectra (<sup>1</sup>H NMR, <sup>13</sup>C NMR, and <sup>19</sup>F NMR)

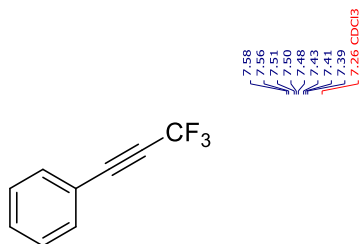

**3a, <sup>1</sup>H NMR**  
(400 MHz, CDCl<sub>3</sub>)  
(in pentane and diethyl ether residue)

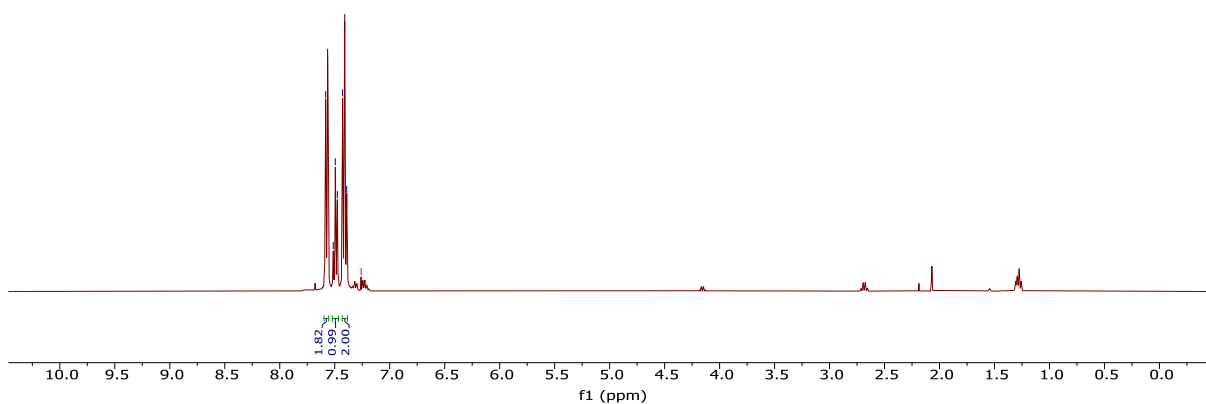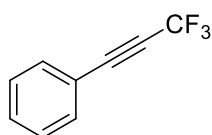

**3a, <sup>13</sup>C NMR**  
(101 MHz, CDCl<sub>3</sub>)  
(in pentane and diethyl ether residue)

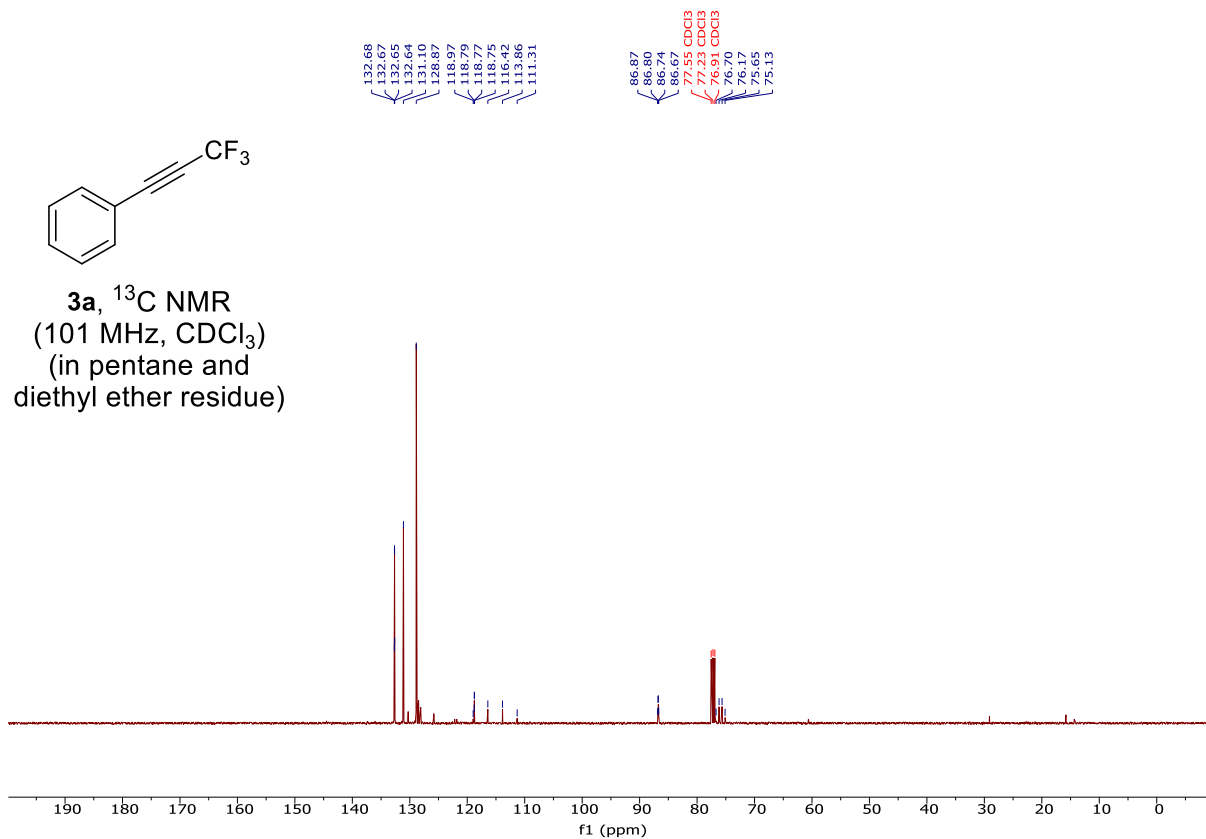

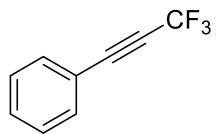

**3a**,  $^{19}\text{F}$  NMR  
(376 MHz,  $\text{CDCl}_3$ )

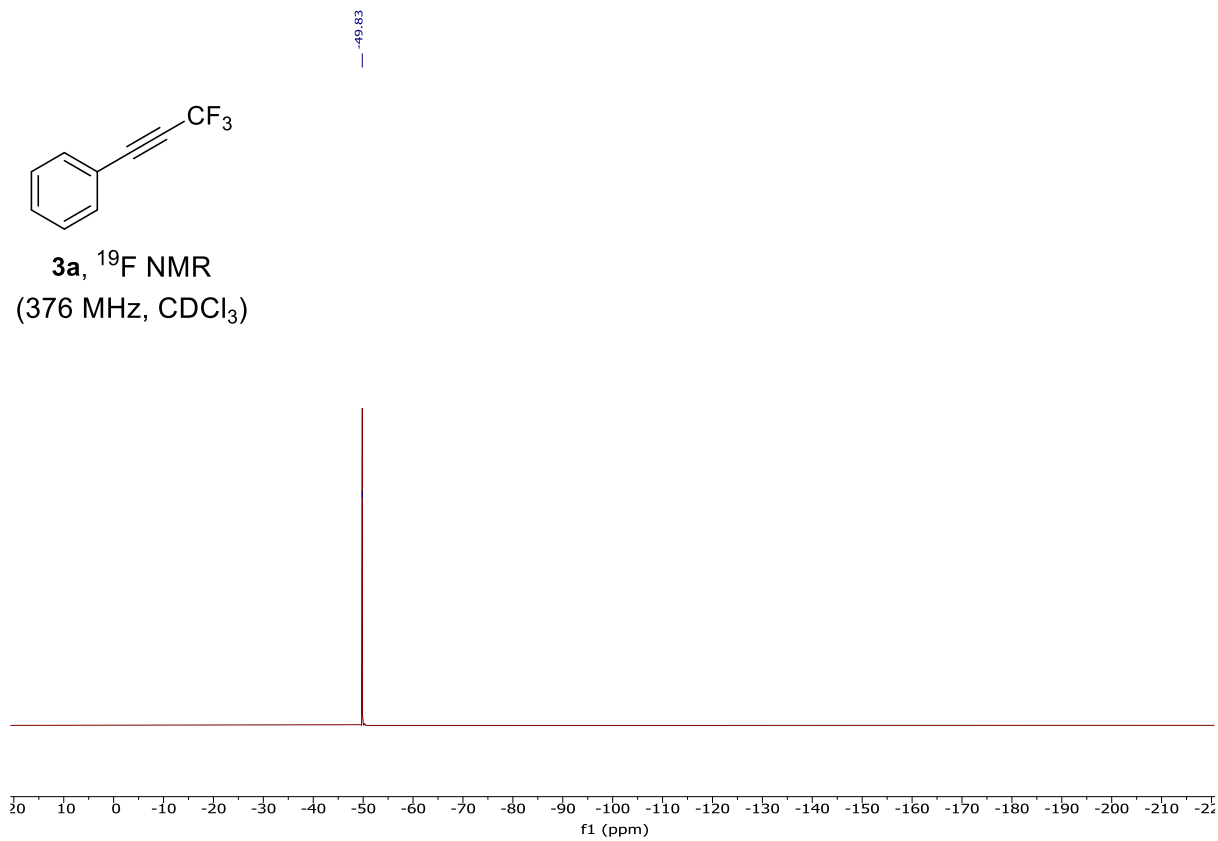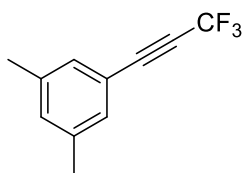

**3ad**,  $^1\text{H}$  NMR  
(400 MHz,  $\text{CDCl}_3$ )

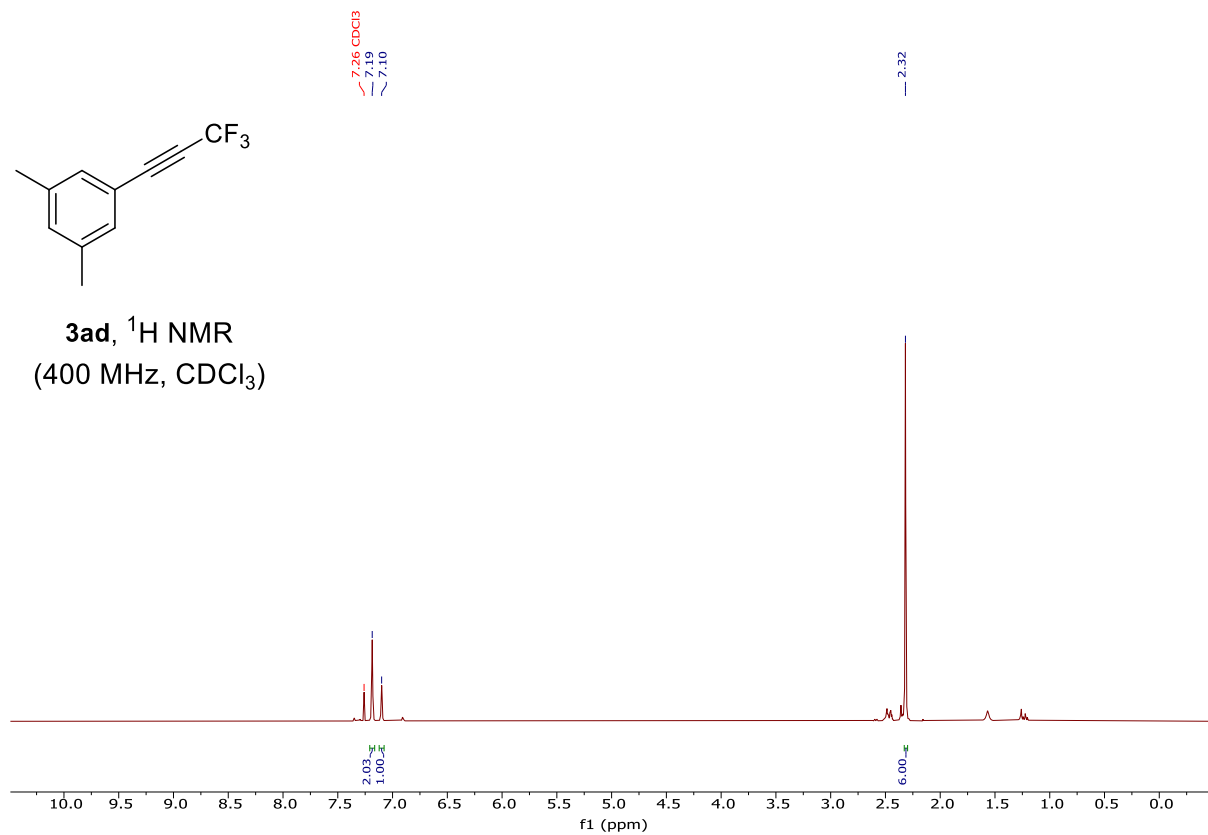

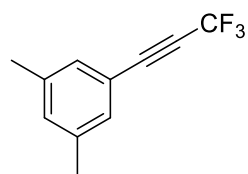

**3ad**,  $^{13}\text{C}$  NMR  
(101 MHz,  $\text{CDCl}_3$ )

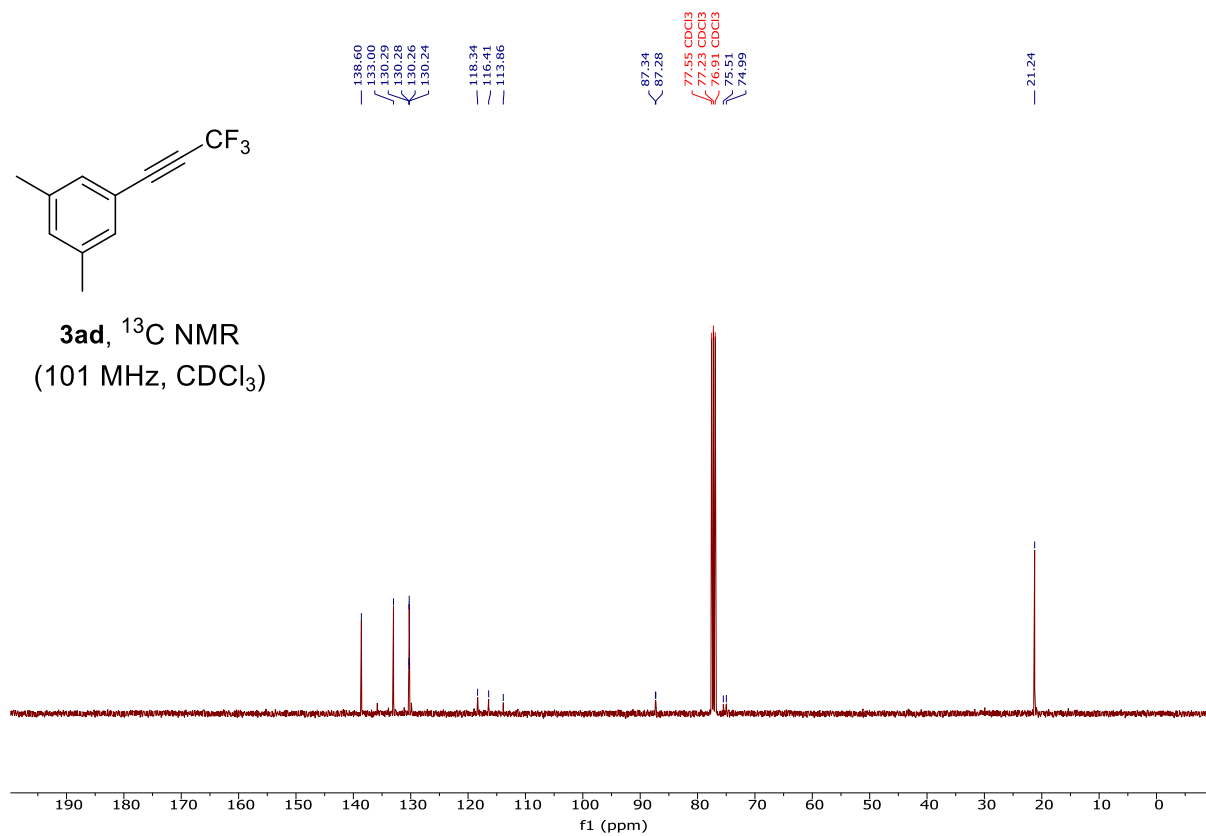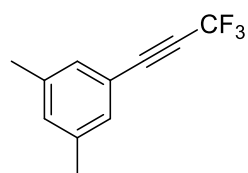

**3ad**,  $^{19}\text{F}$  NMR  
(376 MHz,  $\text{CDCl}_3$ )

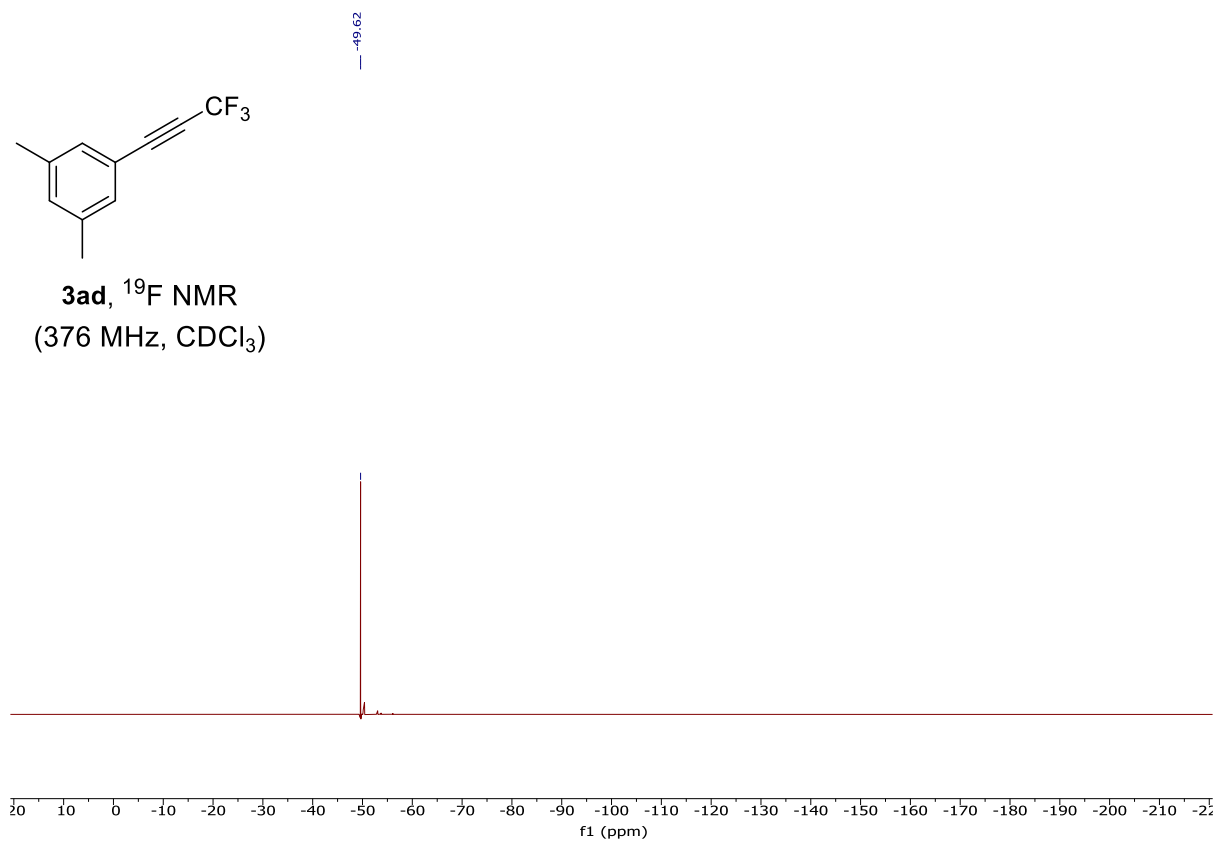

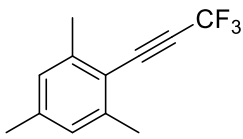

**3ae**,  $^1\text{H}$  NMR  
(400 MHz,  $\text{CDCl}_3$ )

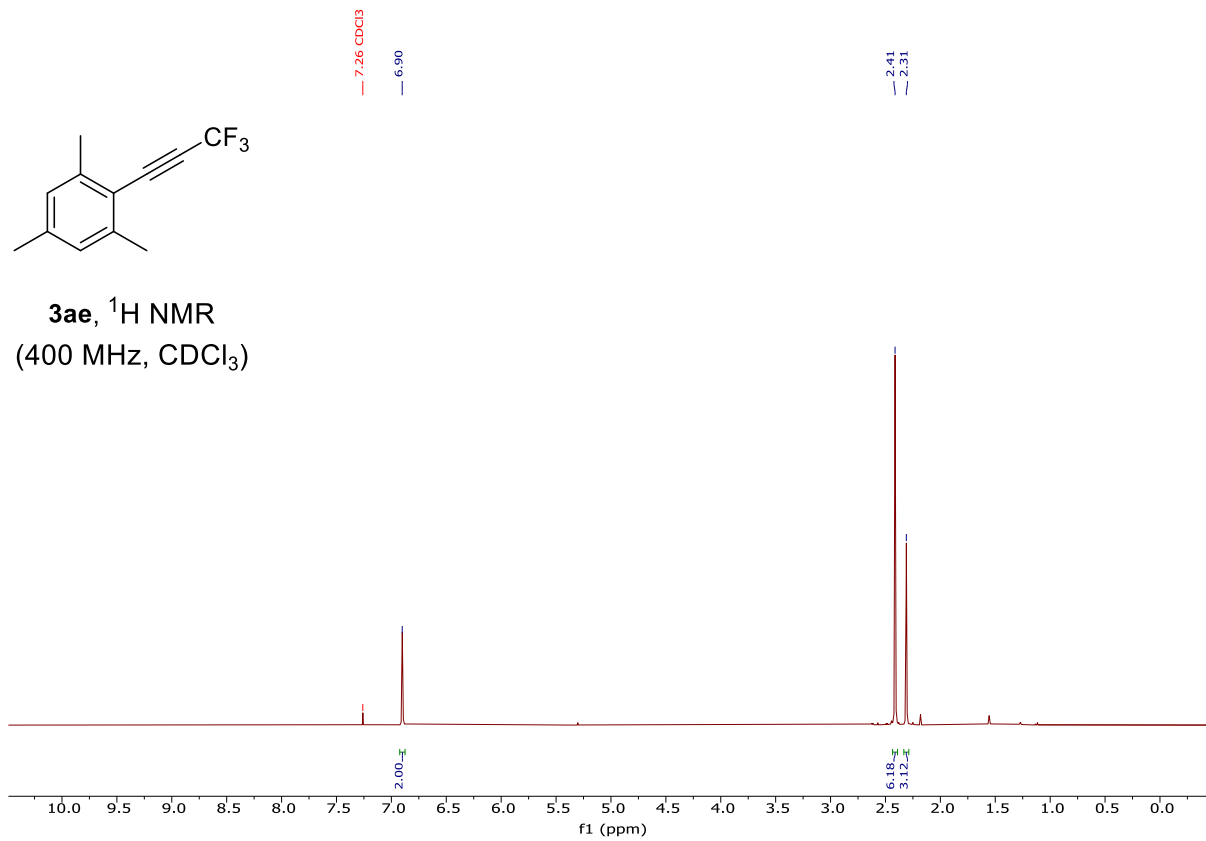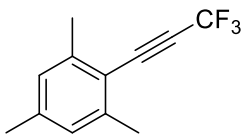

**3ae**,  $^{13}\text{C}$  NMR  
(101 MHz,  $\text{CDCl}_3$ )

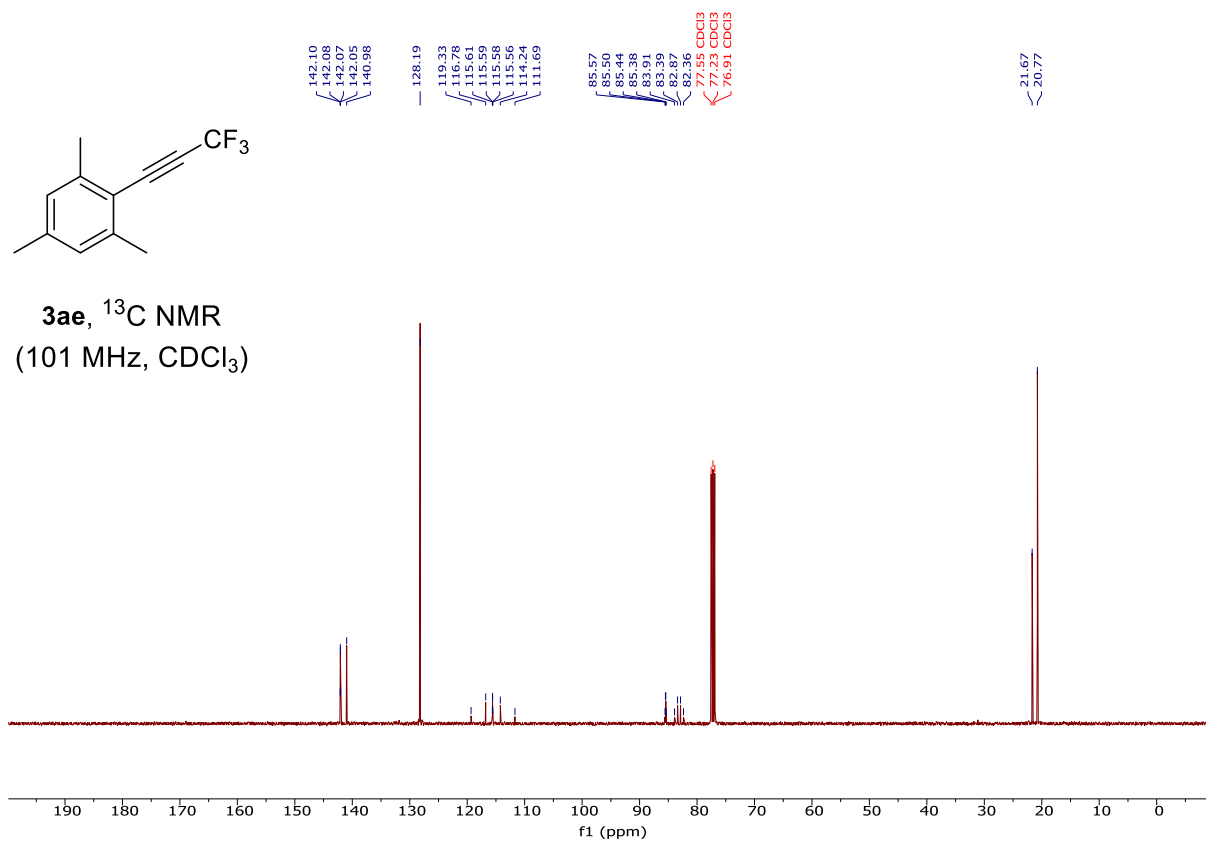

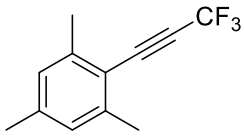

**3ae,  $^{19}\text{F}$  NMR**  
(376 MHz,  $\text{CDCl}_3$ )

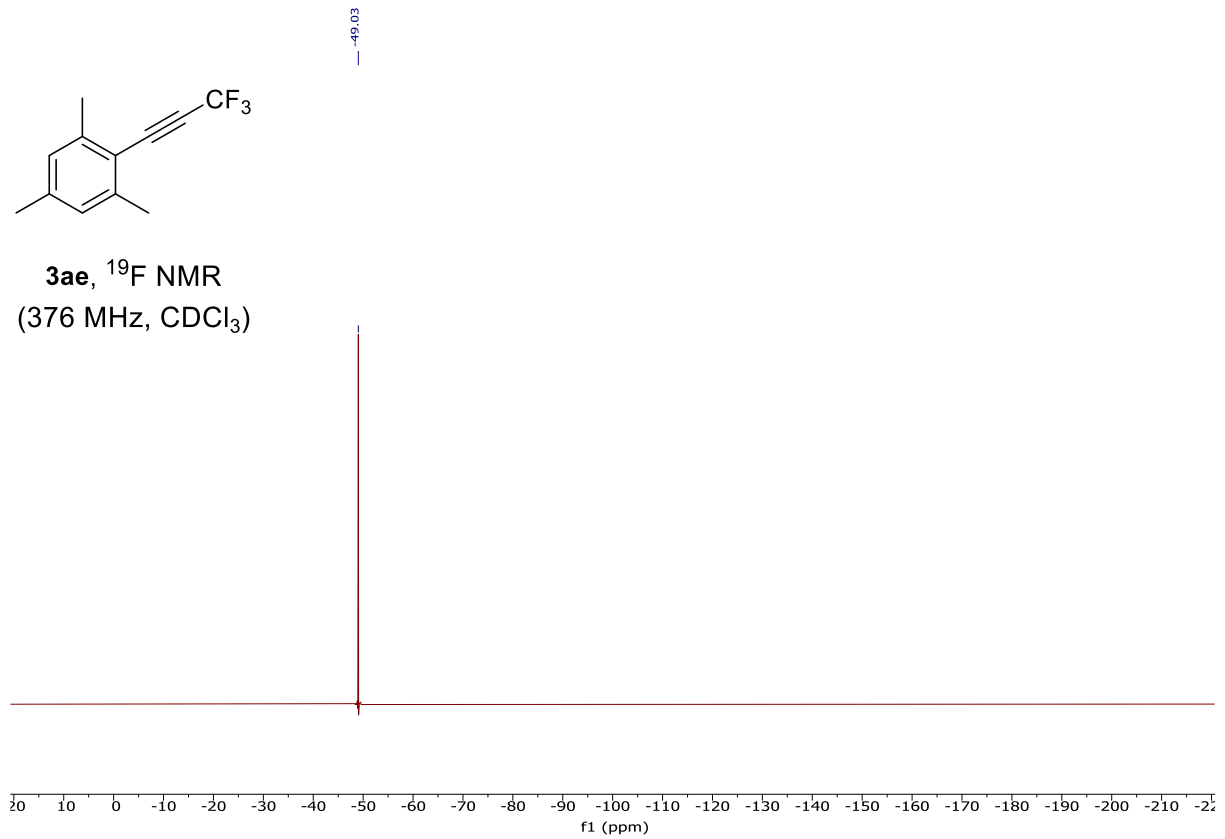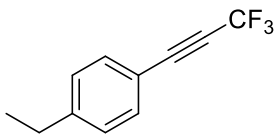

**3af,  $^1\text{H}$  NMR**  
(400 MHz,  $\text{CDCl}_3$ )  
(in pentane residue)

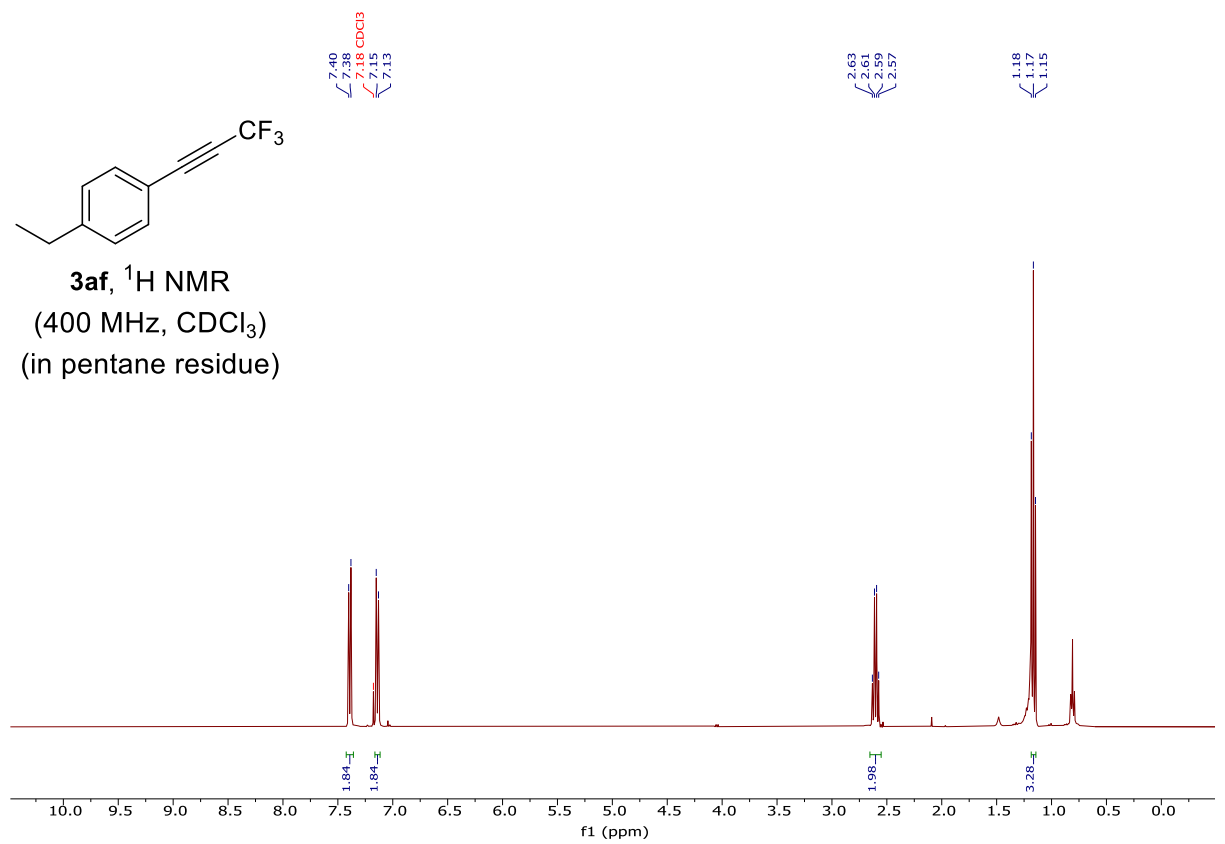



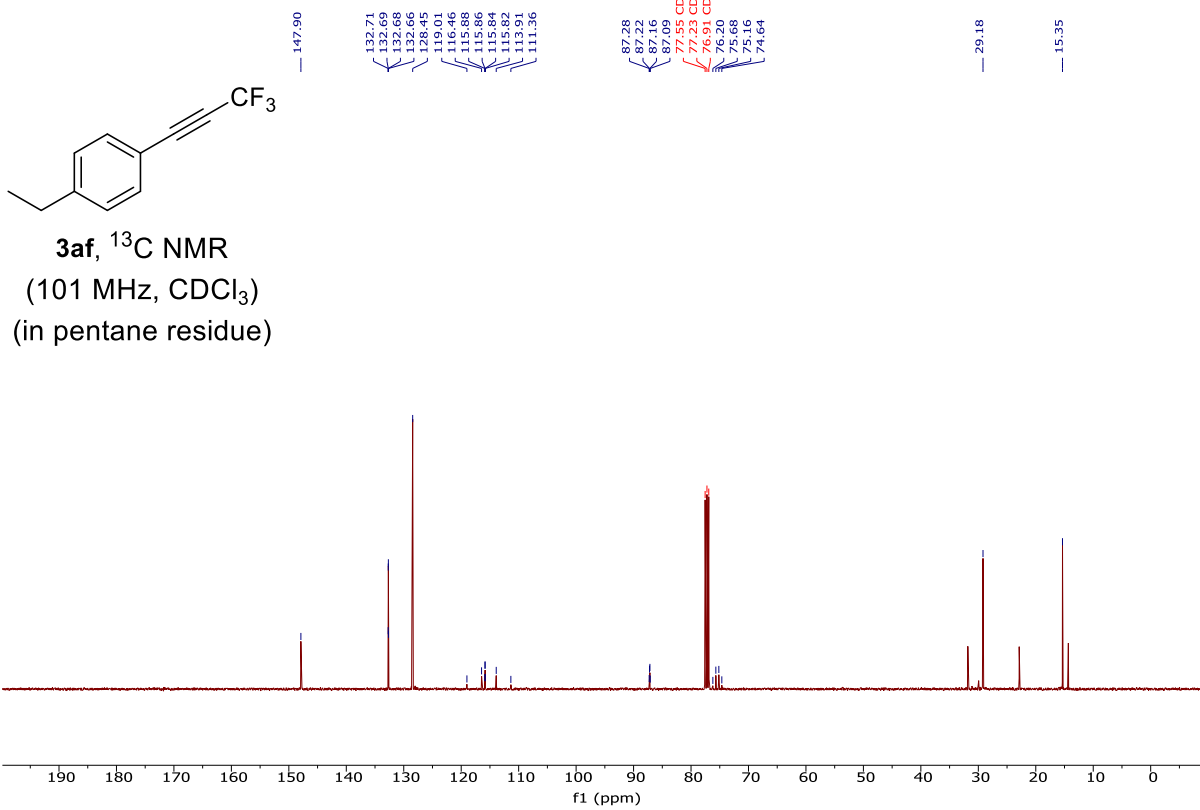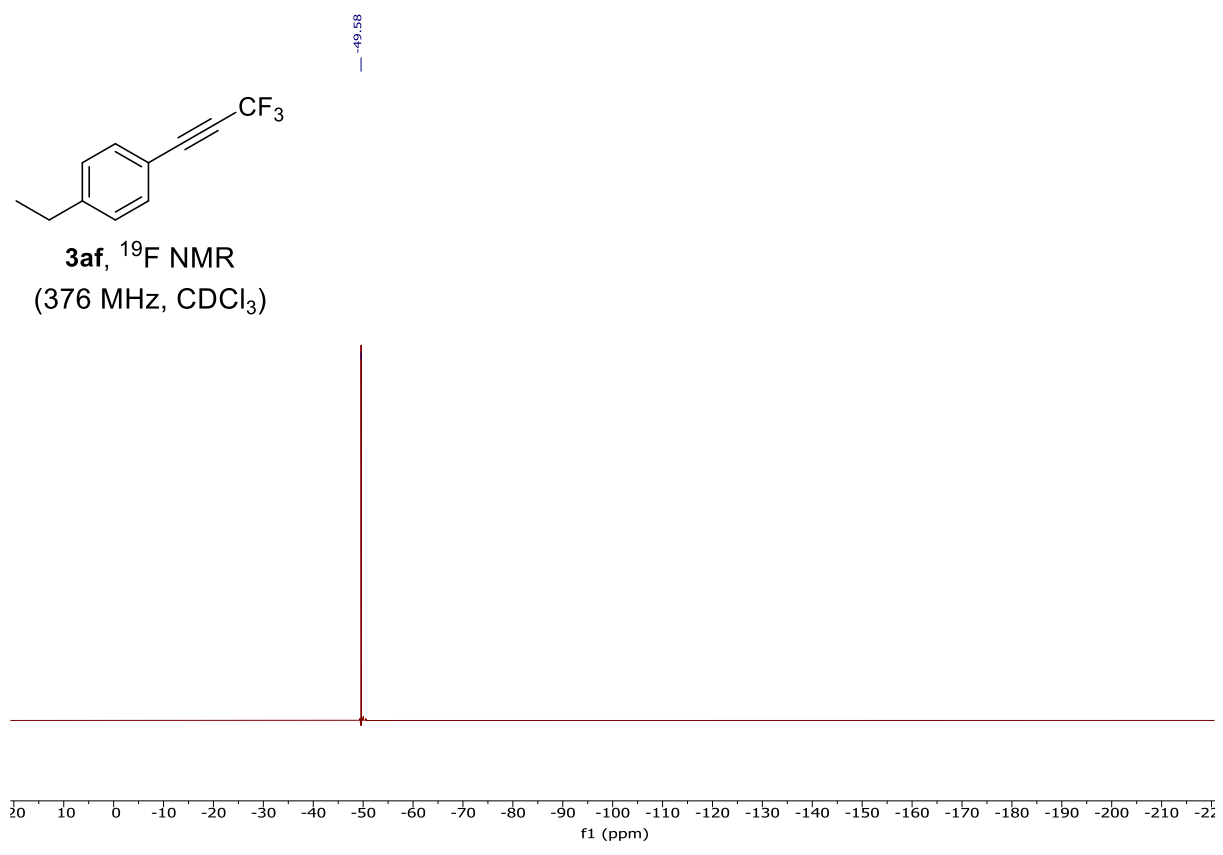

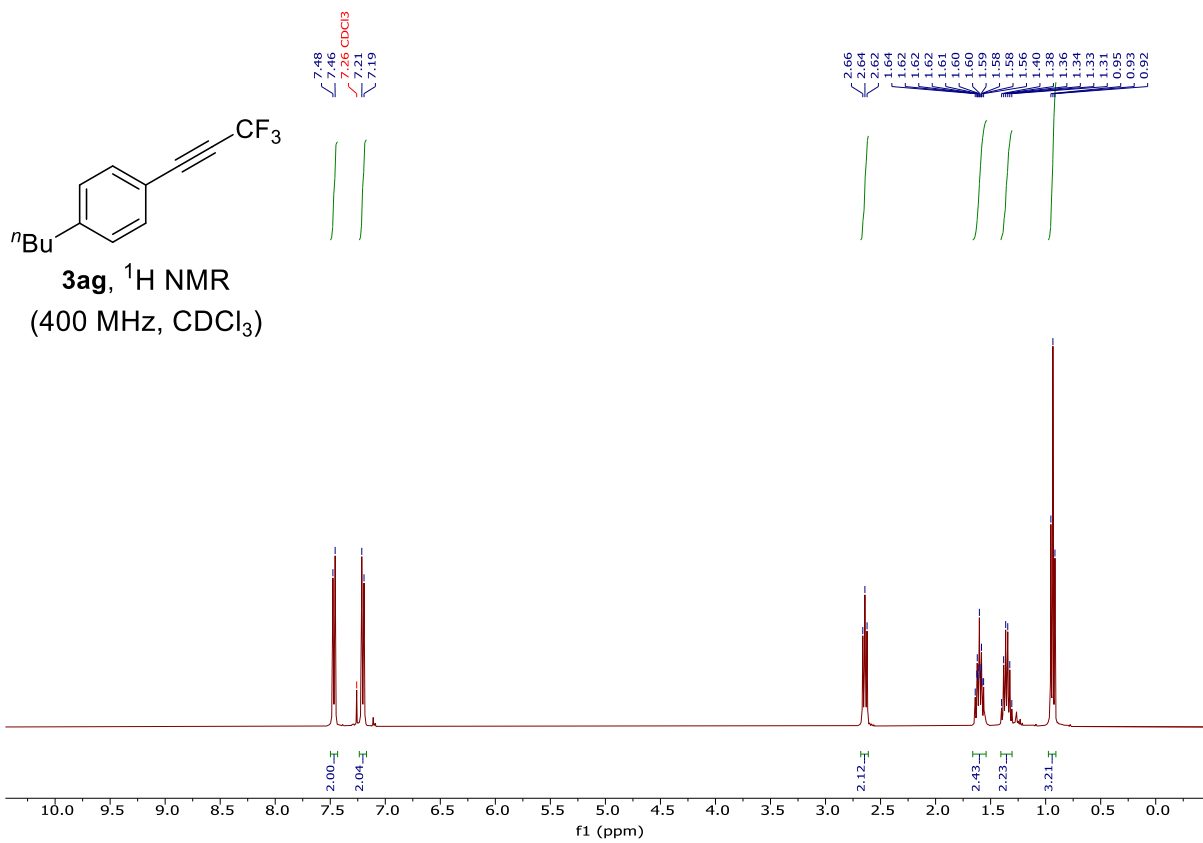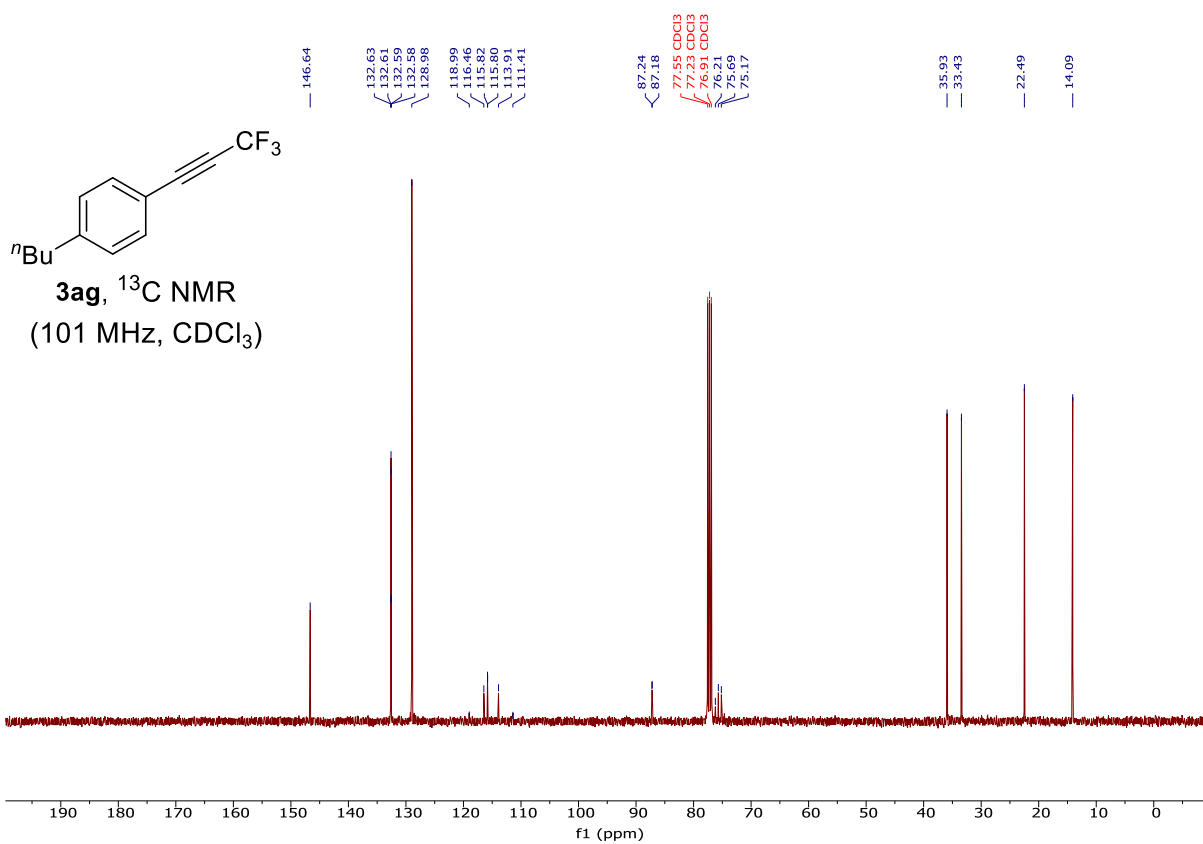

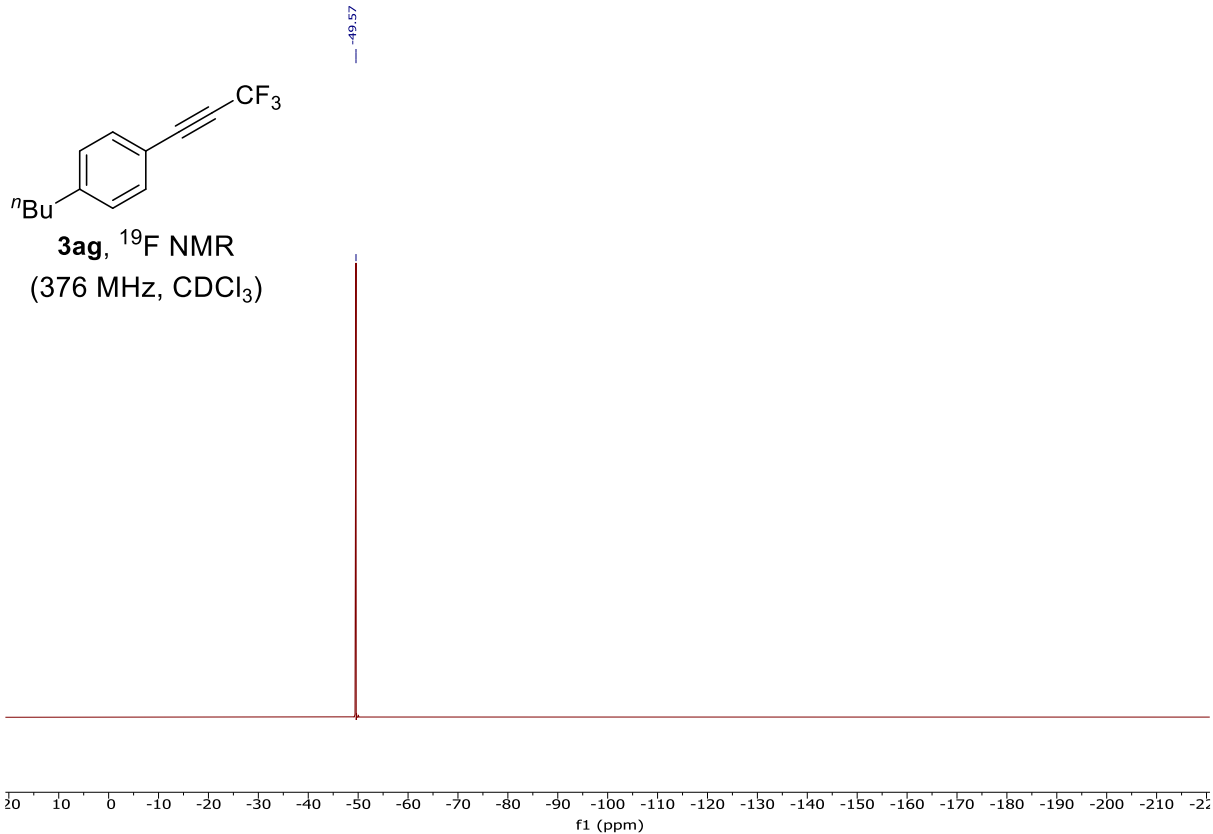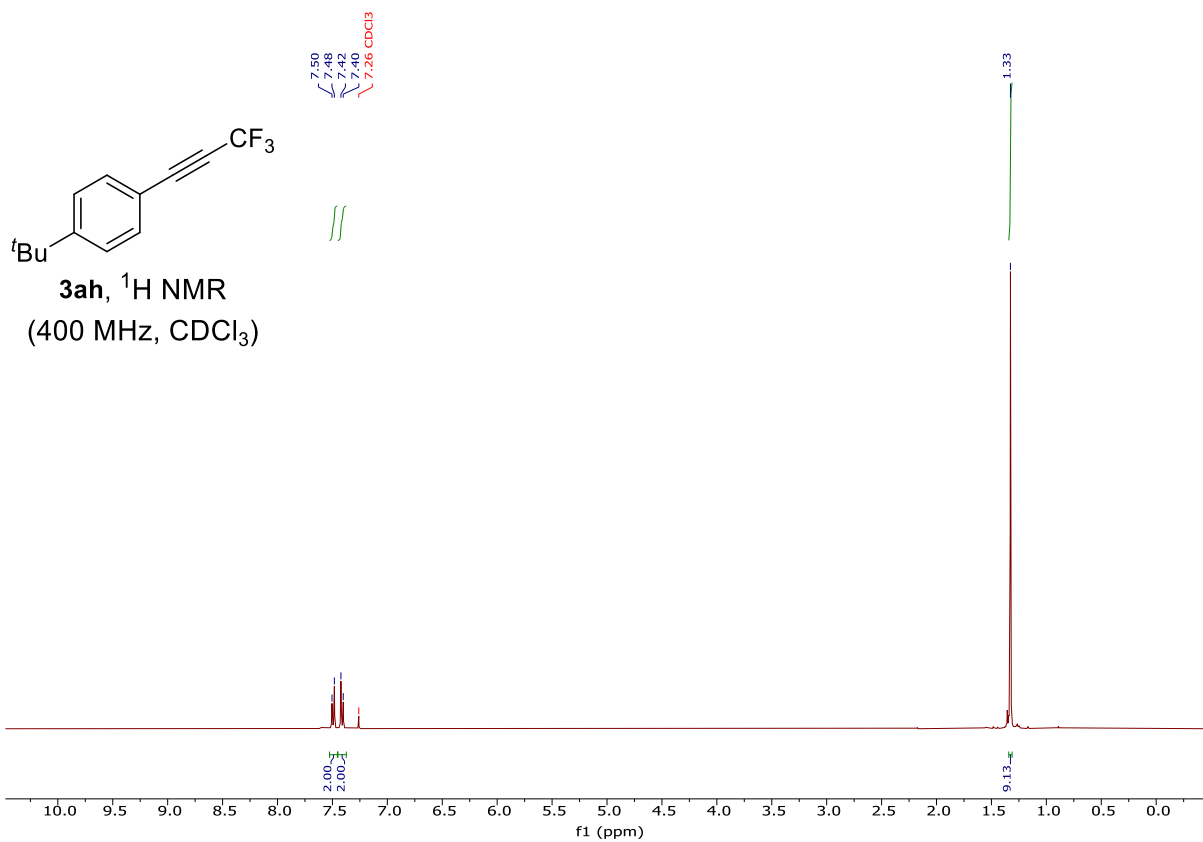

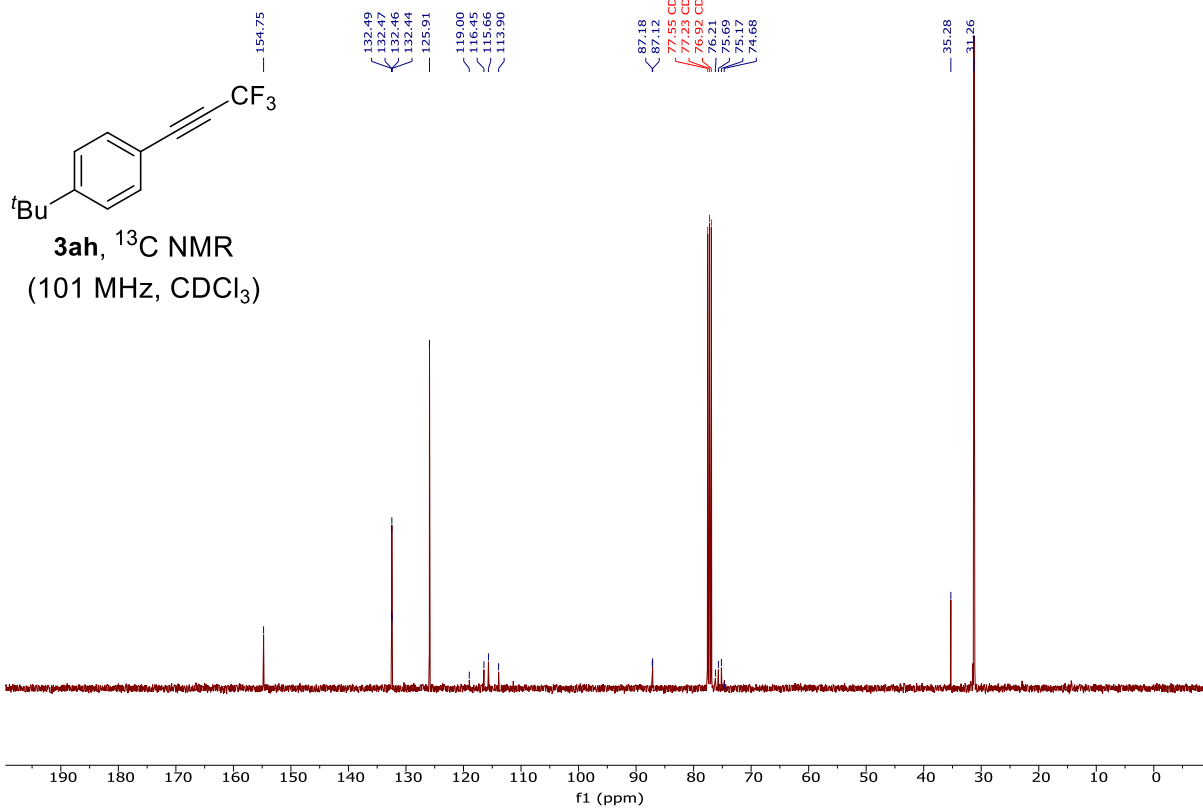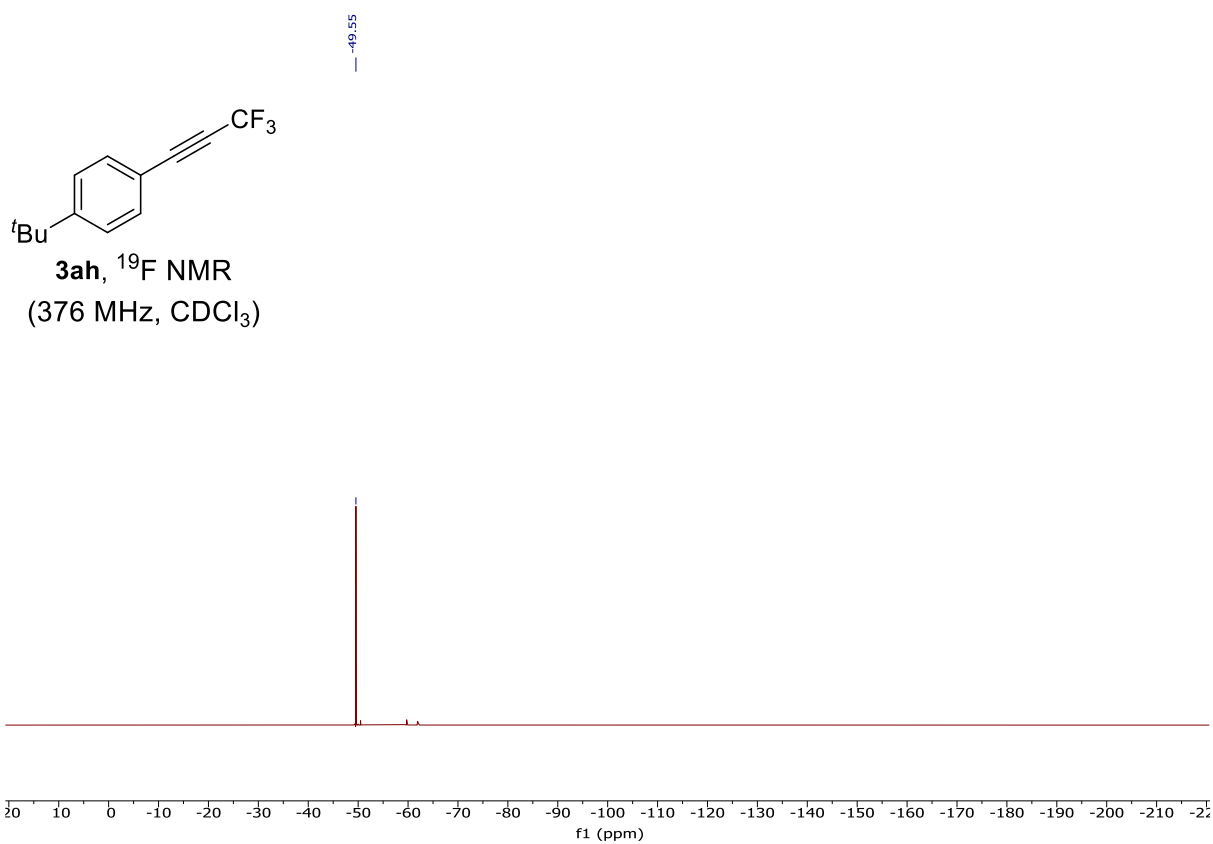

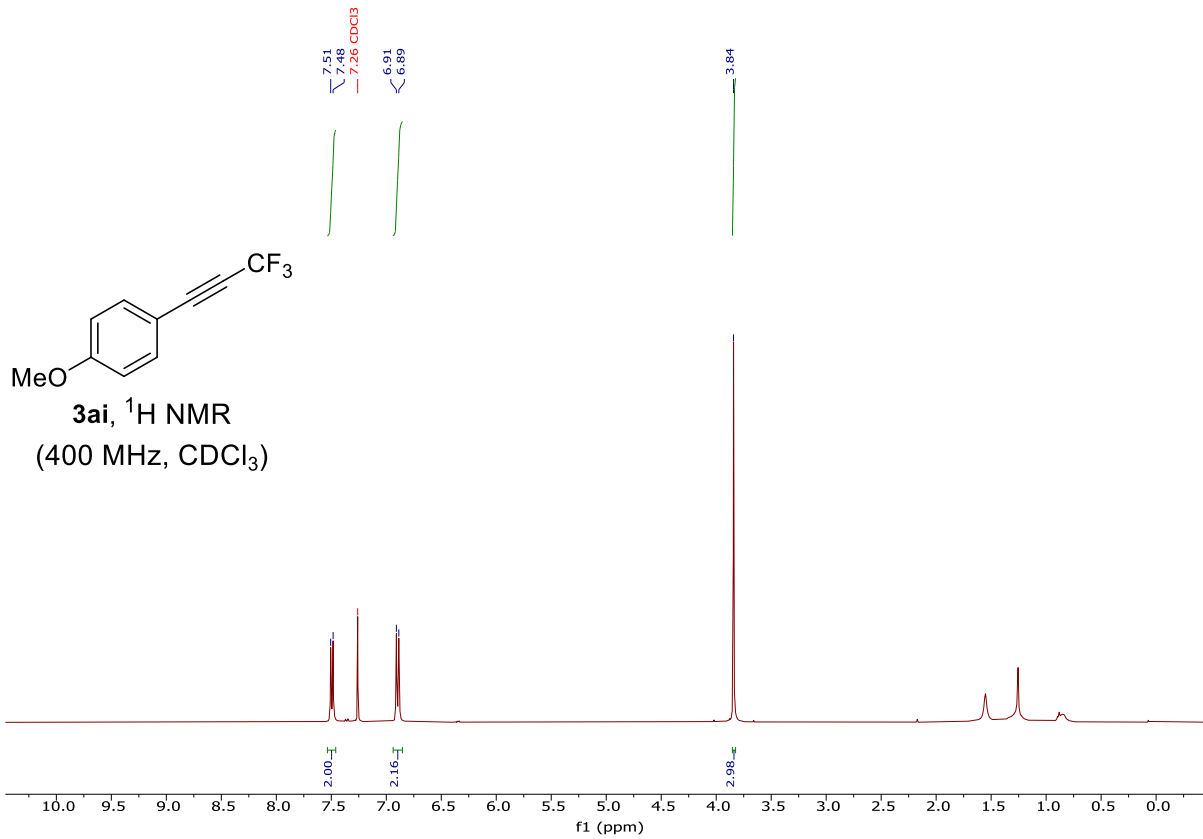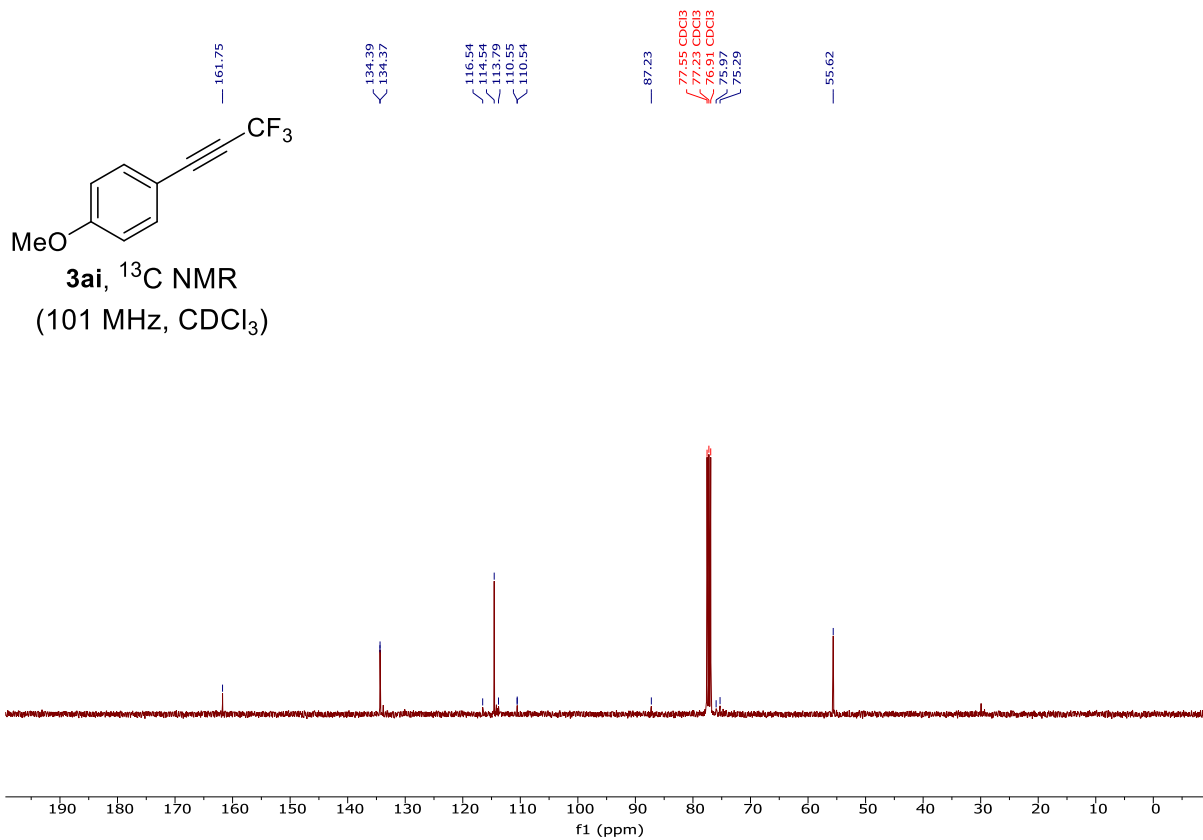

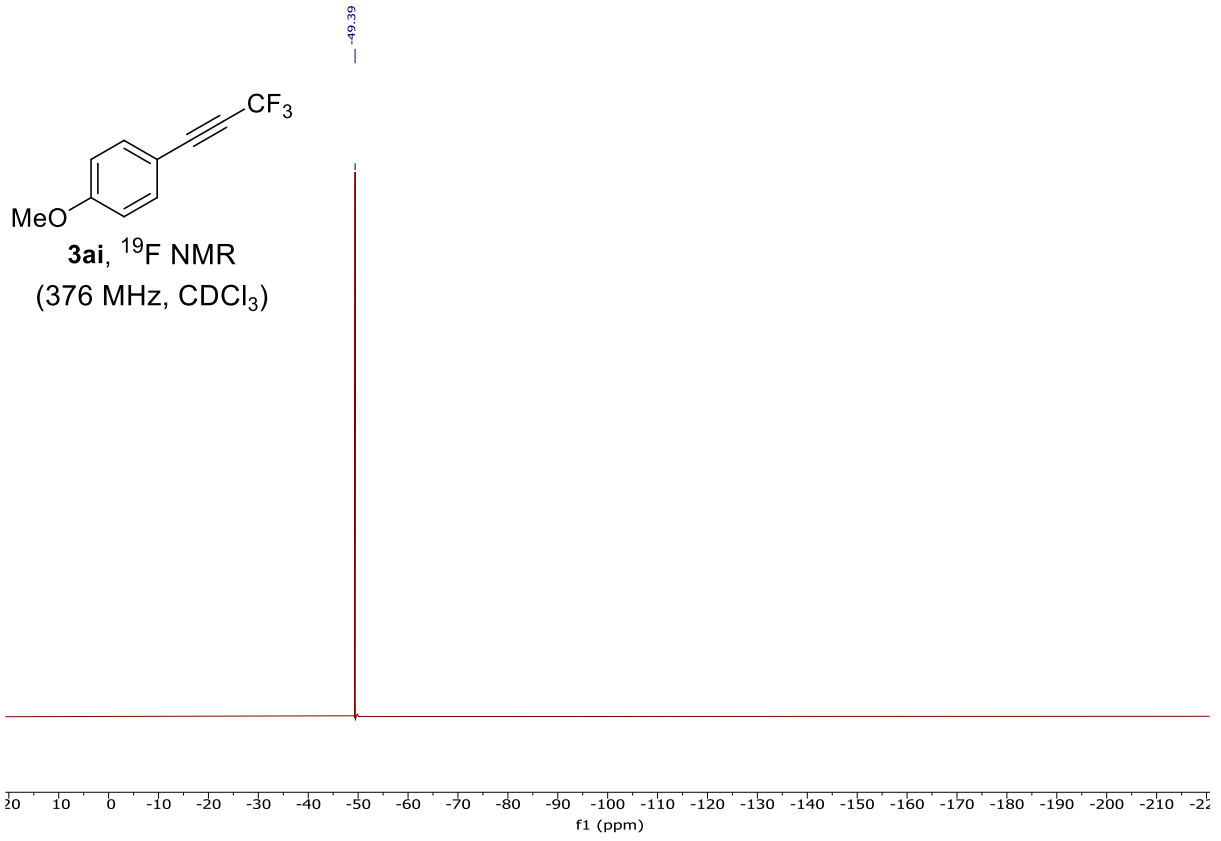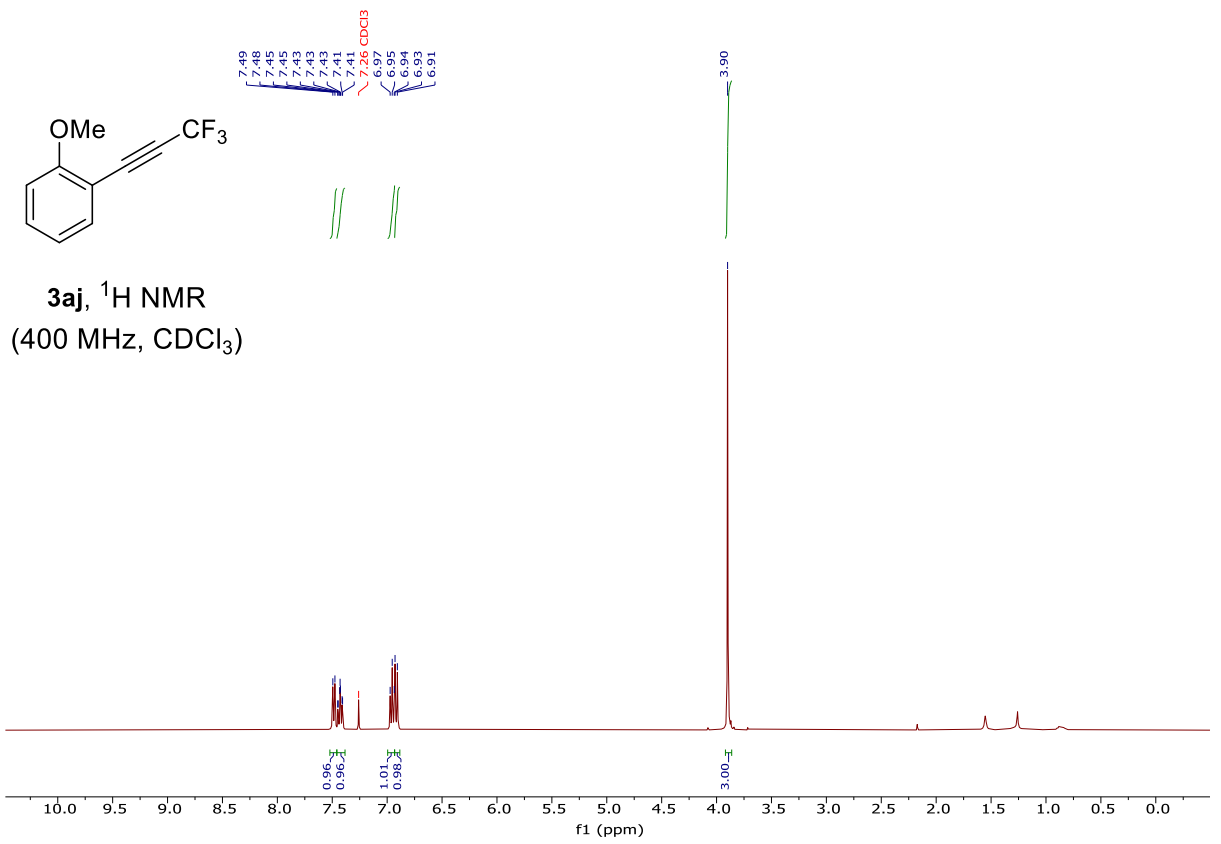

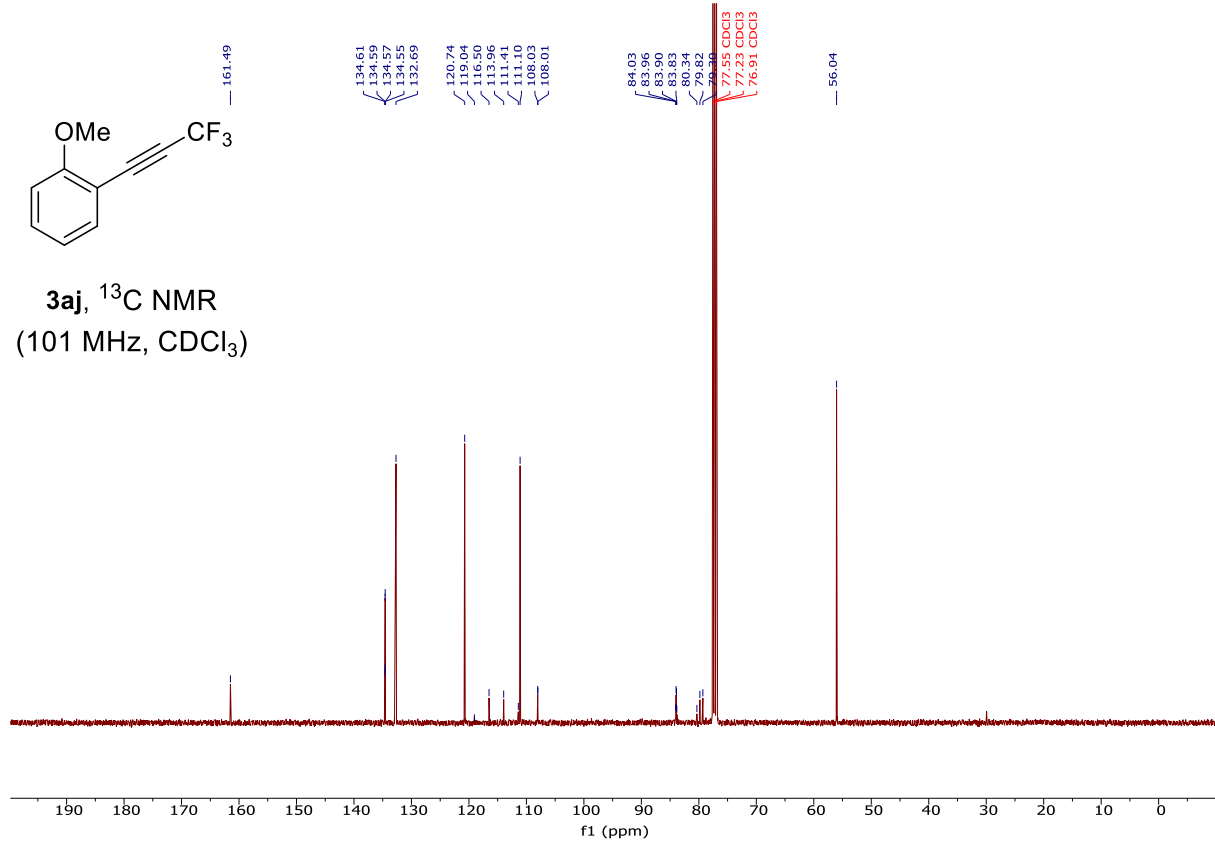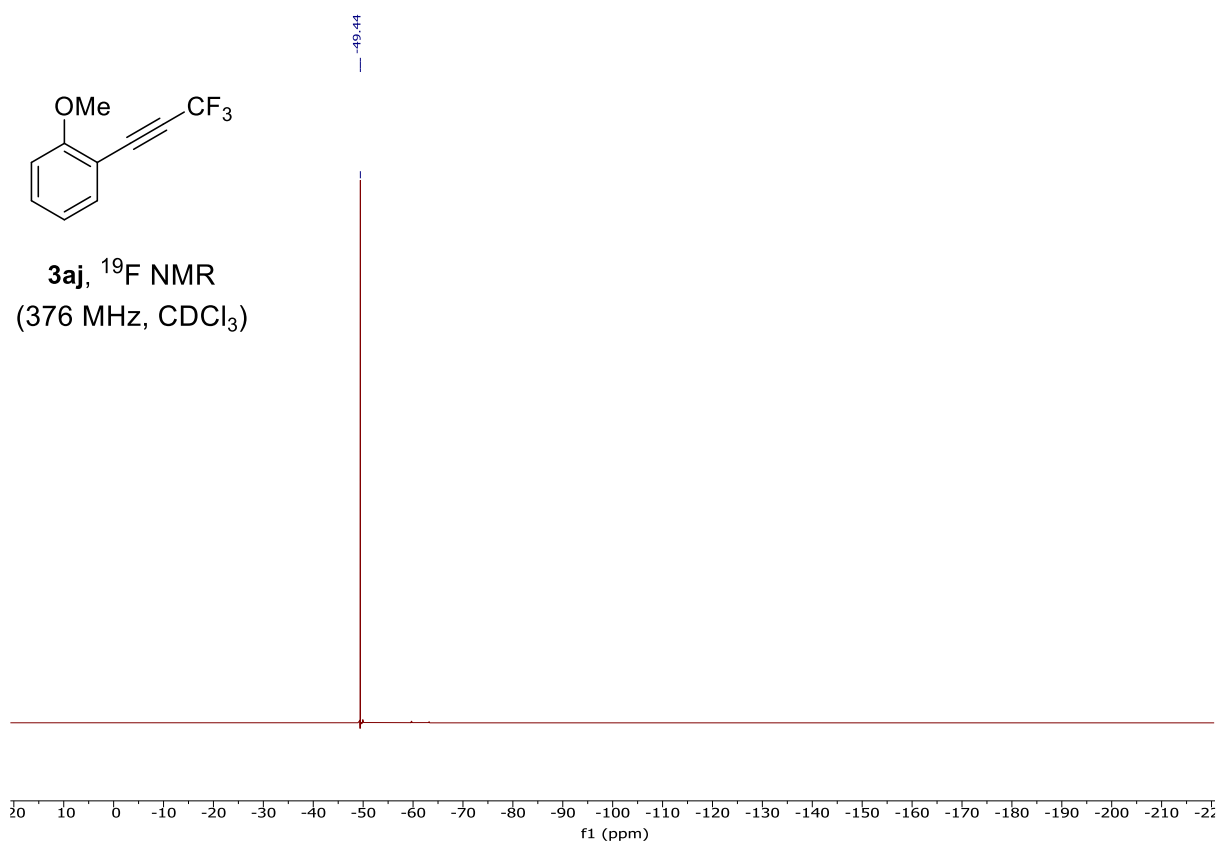

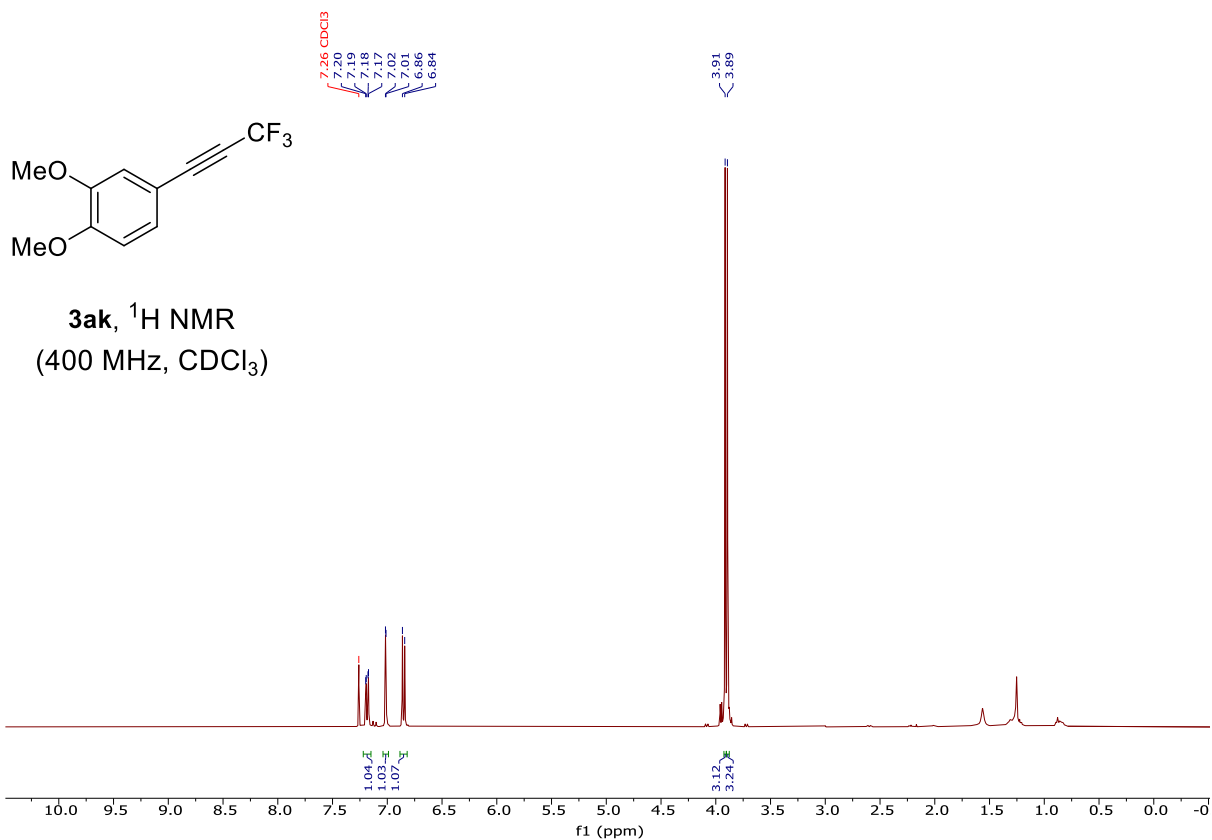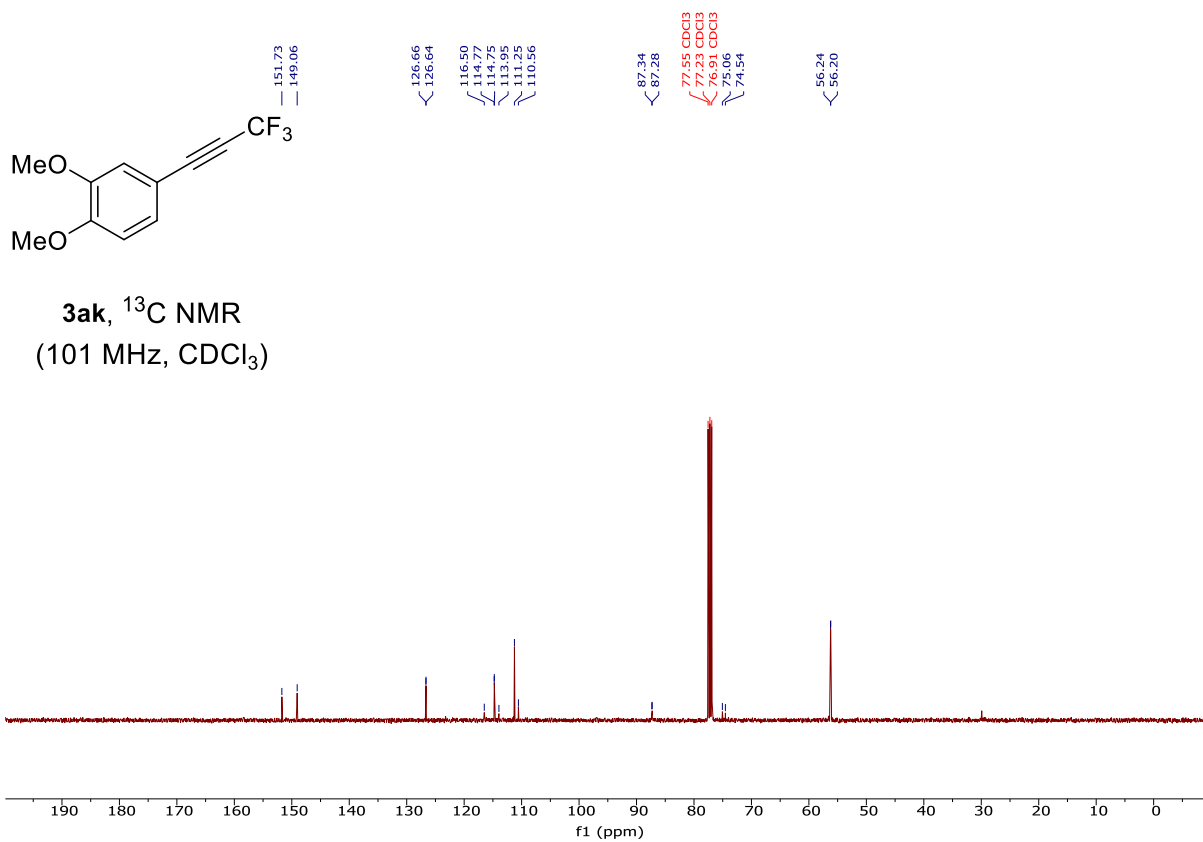



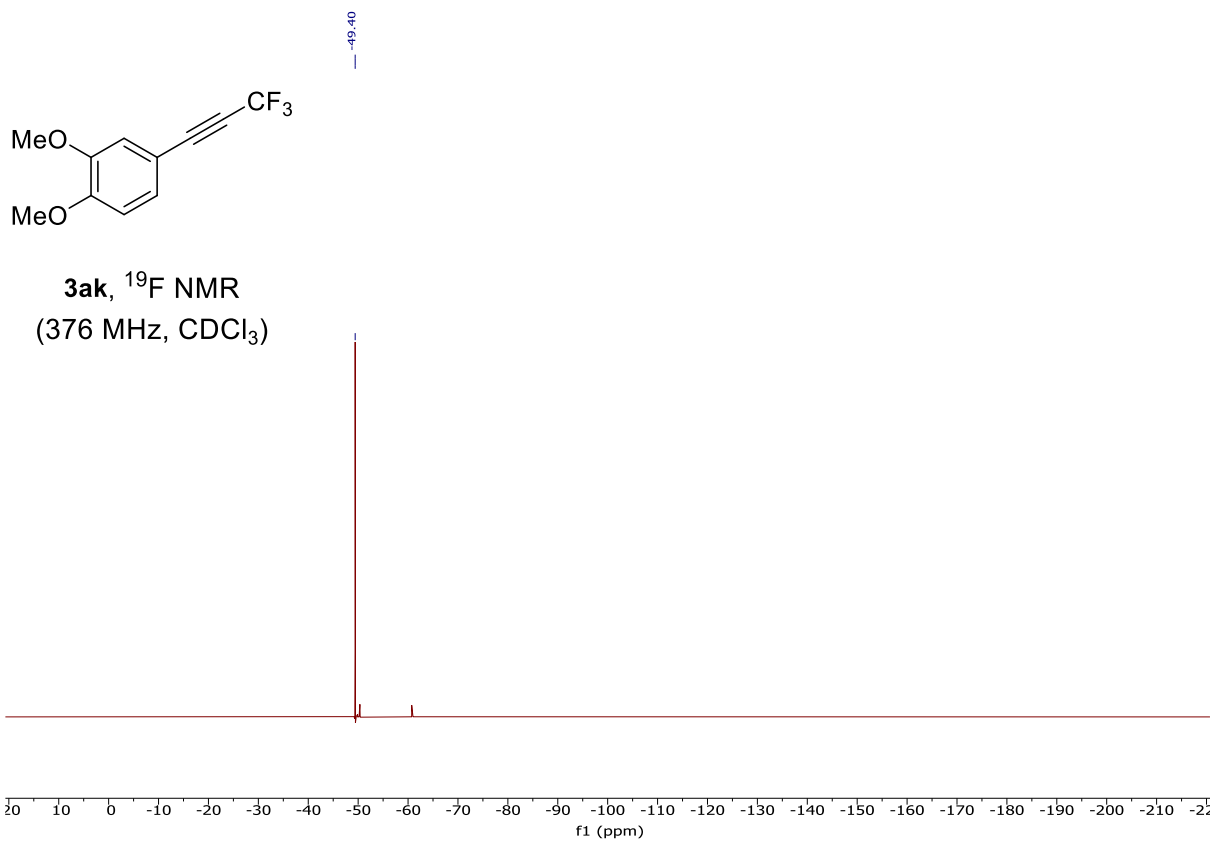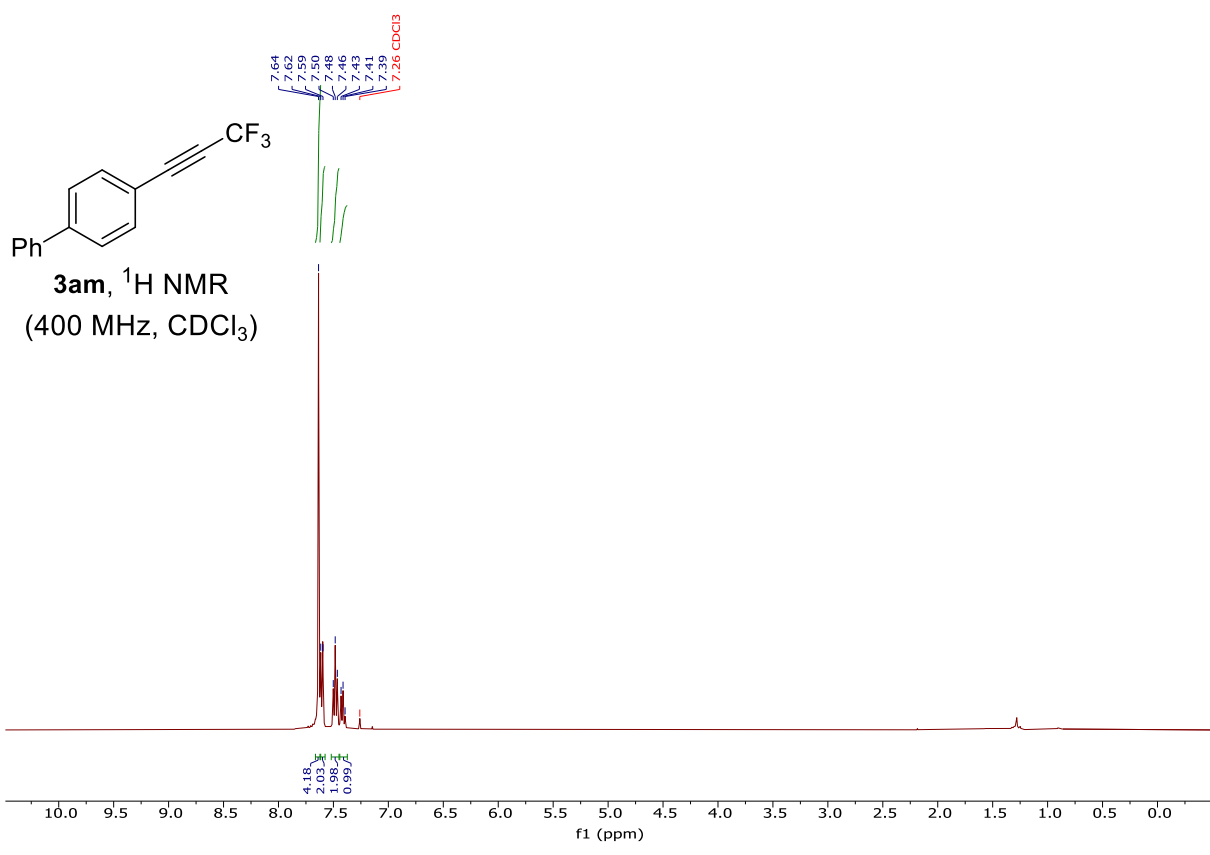

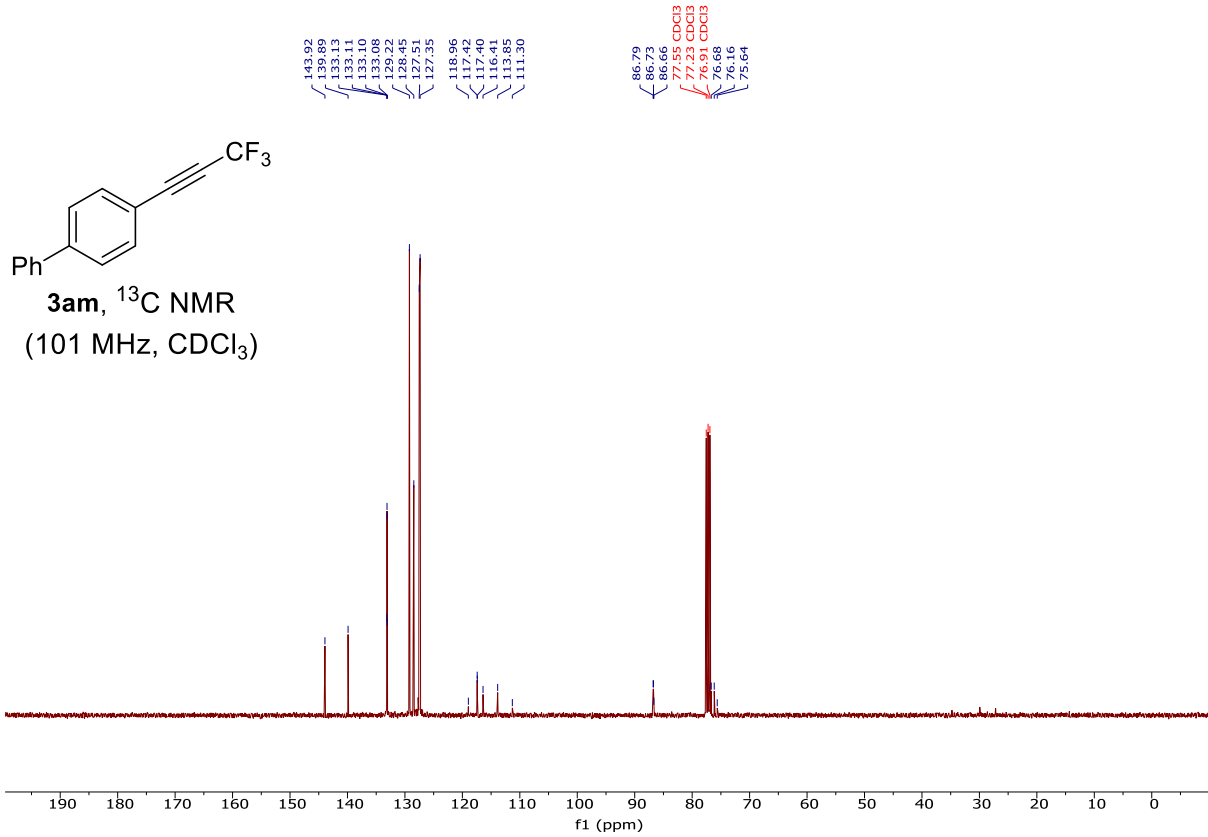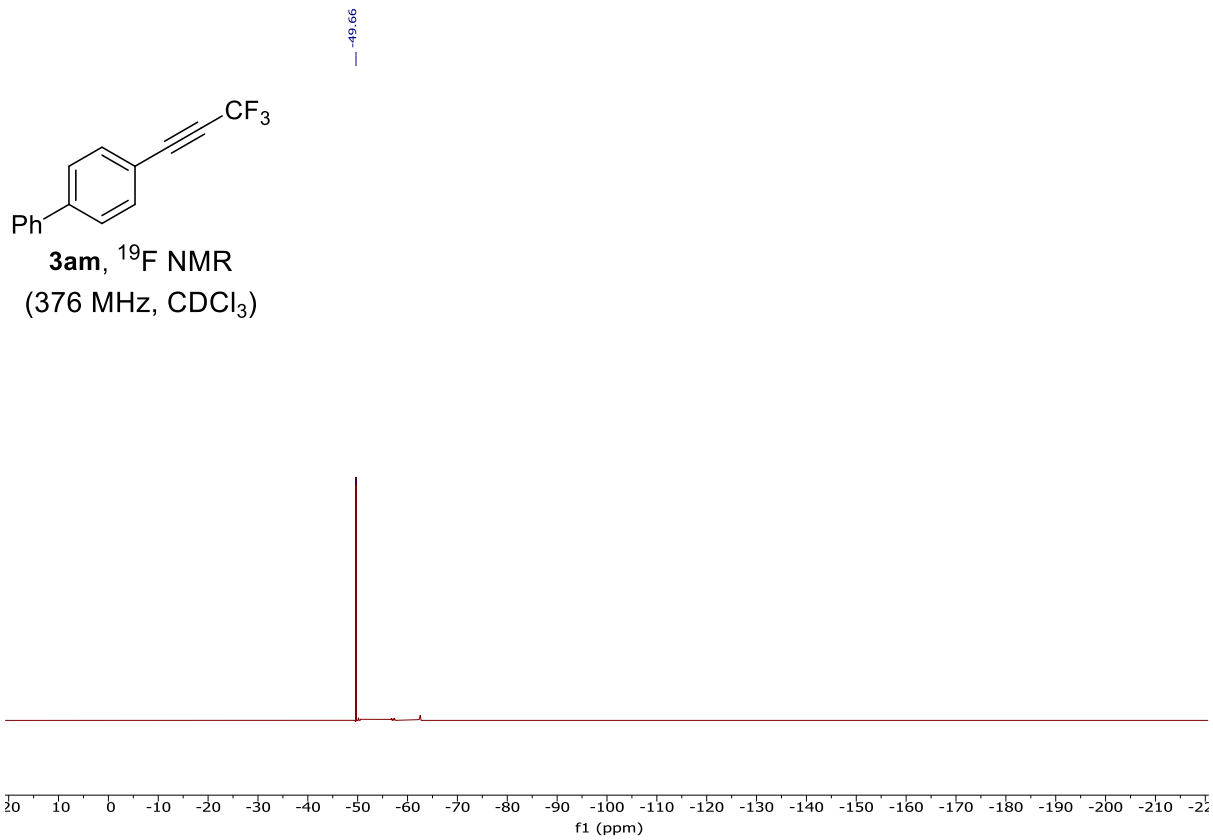

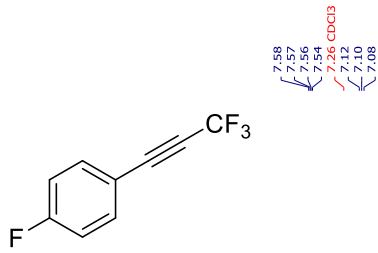

**3an**,  $^1\text{H}$  NMR  
(400 MHz,  $\text{CDCl}_3$ )  
(in pentane and  
diethyl ether residue)

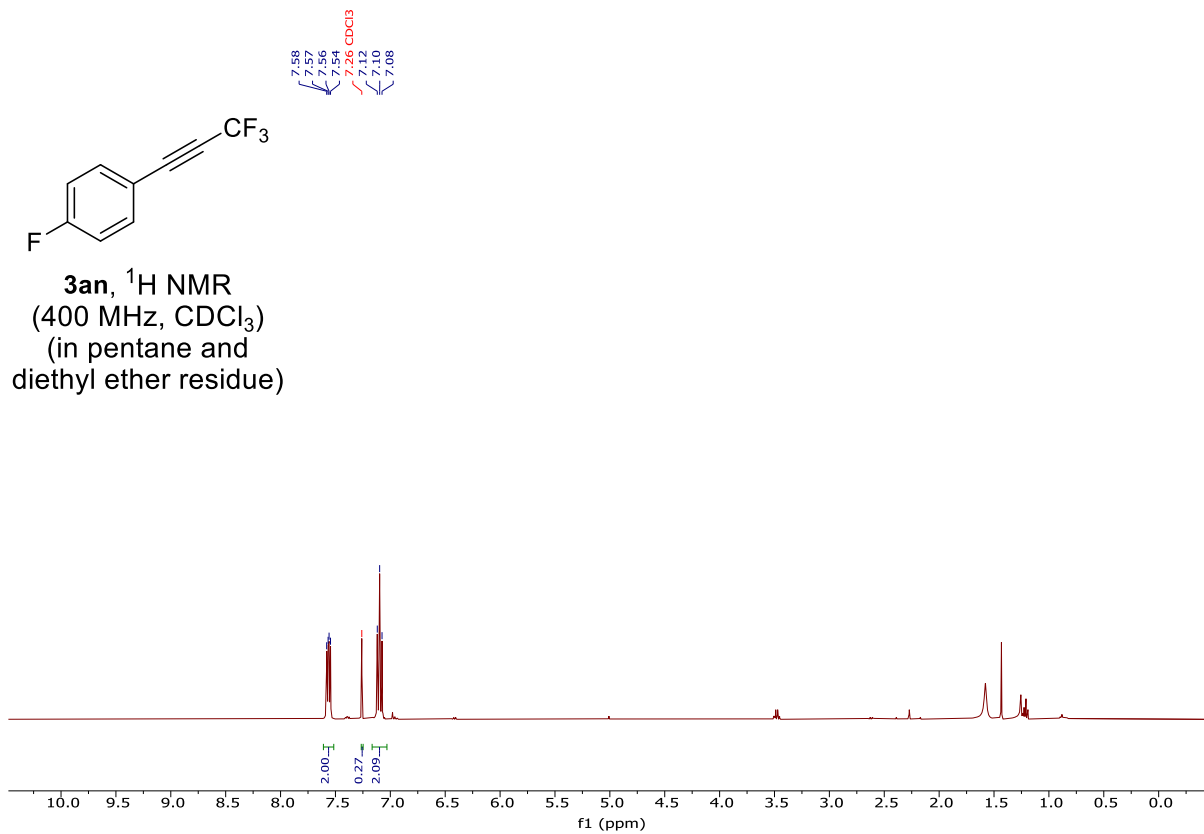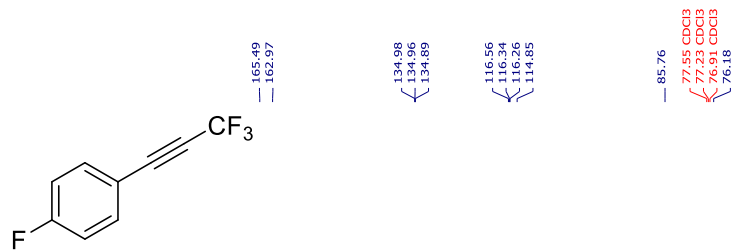

**3an**,  $^{13}\text{C}$  NMR  
(101 MHz,  $\text{CDCl}_3$ )  
(in pentane and  
diethyl ether residue)

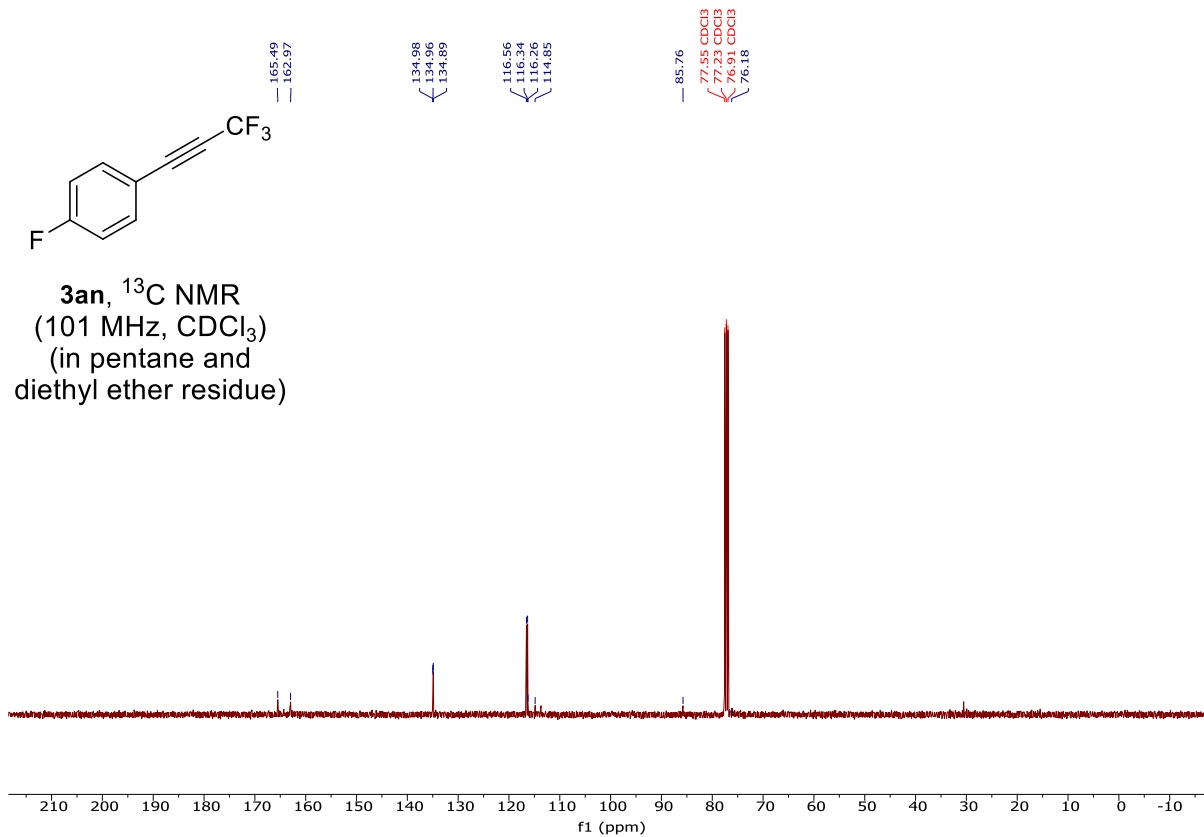

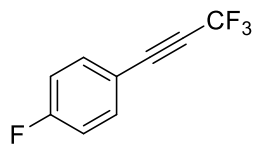

**3an**,  $^{19}\text{F}$  NMR  
(376 MHz,  $\text{CDCl}_3$ )

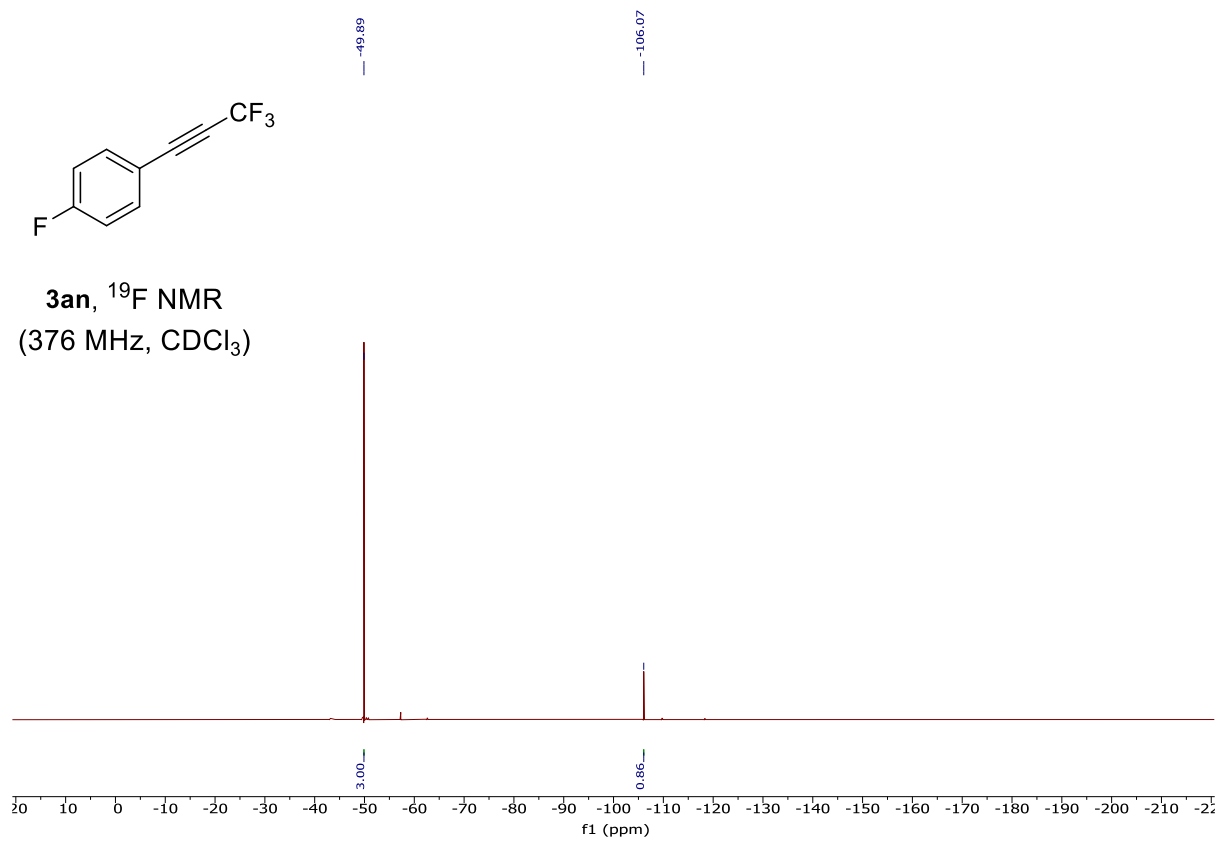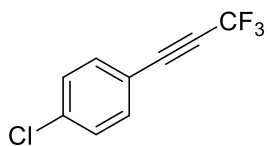

**3ao**,  $^1\text{H}$  NMR  
(400 MHz,  $\text{CDCl}_3$ )

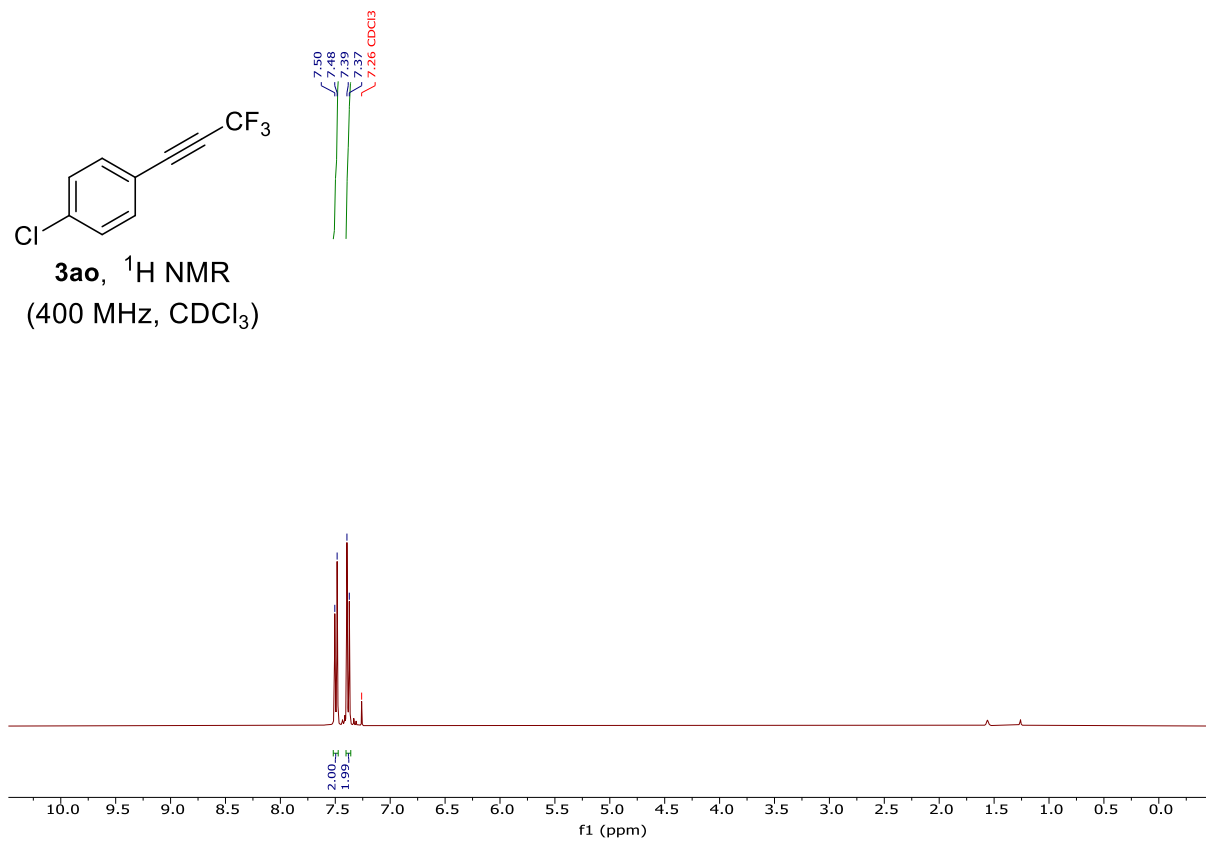

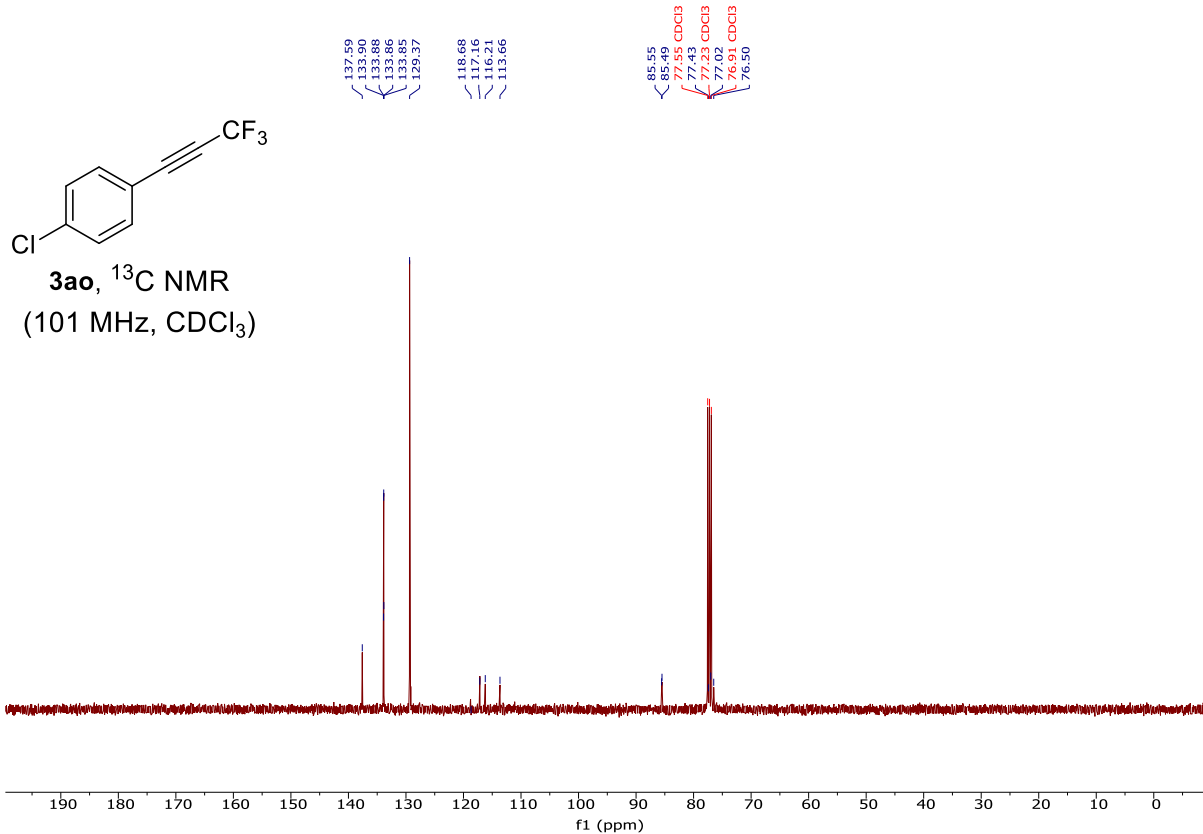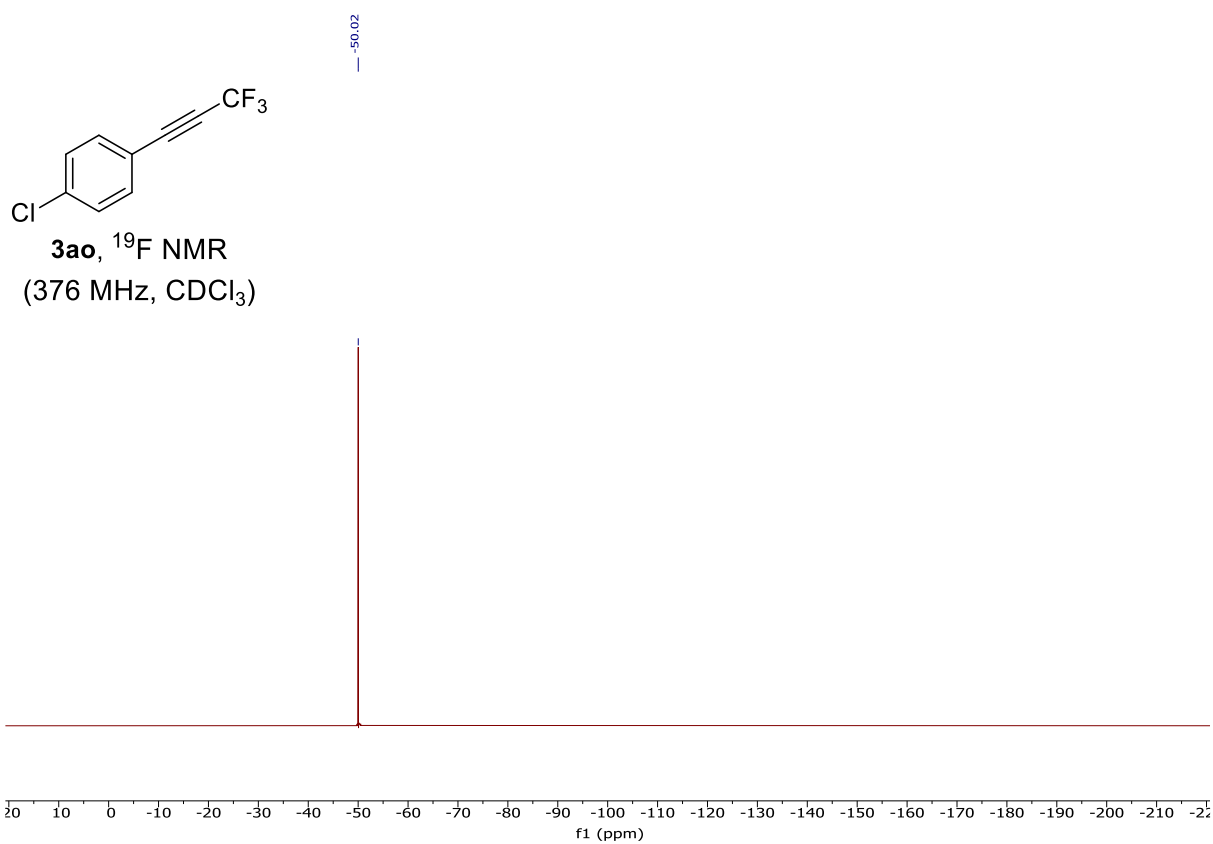

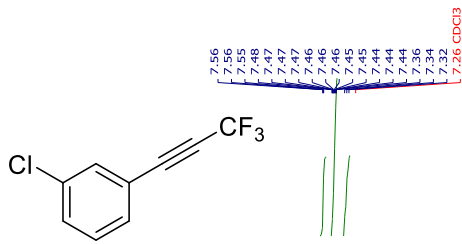

**3ap, <sup>1</sup>H NMR**  
(400 MHz, CDCl<sub>3</sub>)

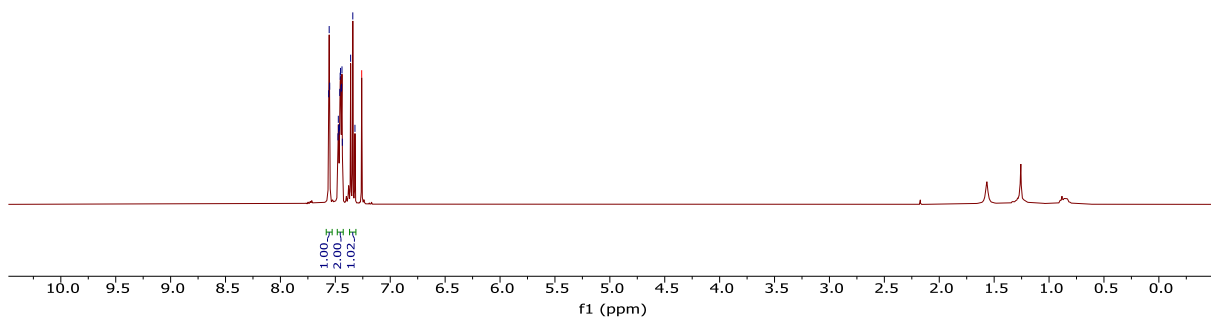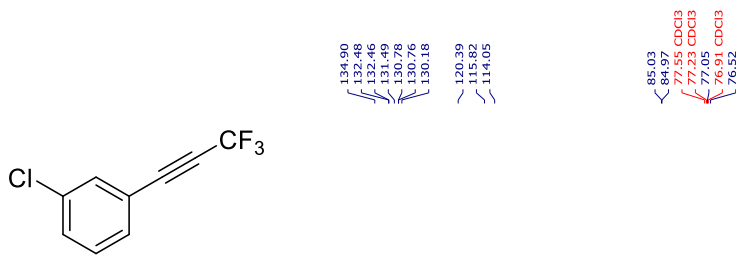

**3ap, <sup>13</sup>C NMR**  
(101 MHz, CDCl<sub>3</sub>)

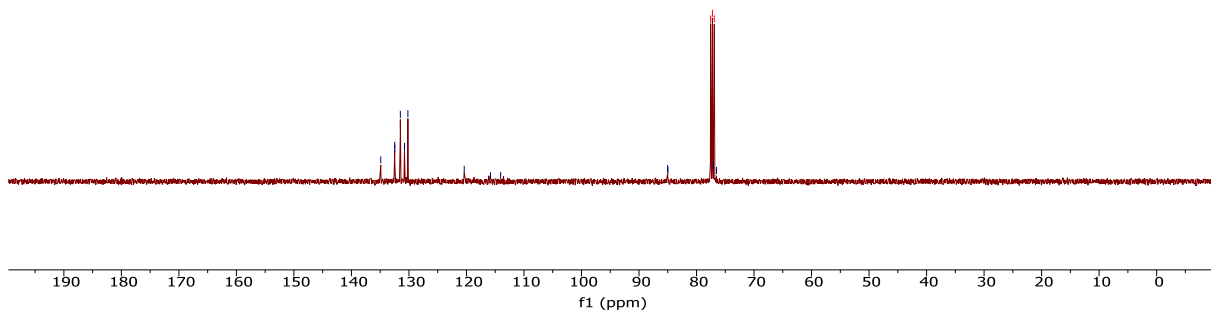

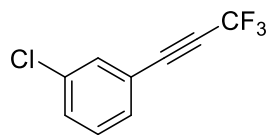

**3ap**,  $^{19}\text{F}$  NMR  
(376 MHz,  $\text{CDCl}_3$ )

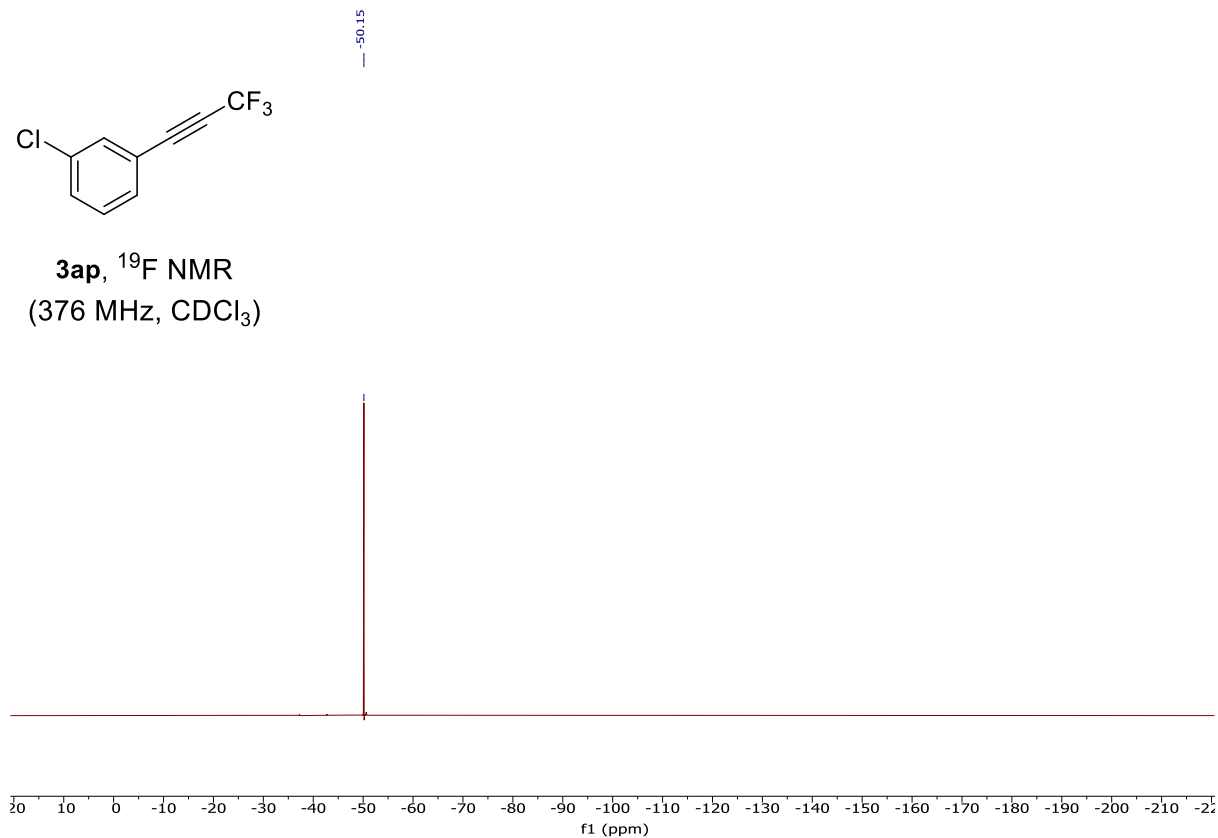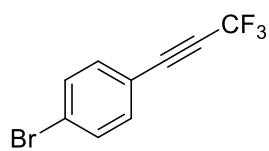

**3aq**,  $^1\text{H}$  NMR  
(400 MHz,  $\text{CDCl}_3$ )

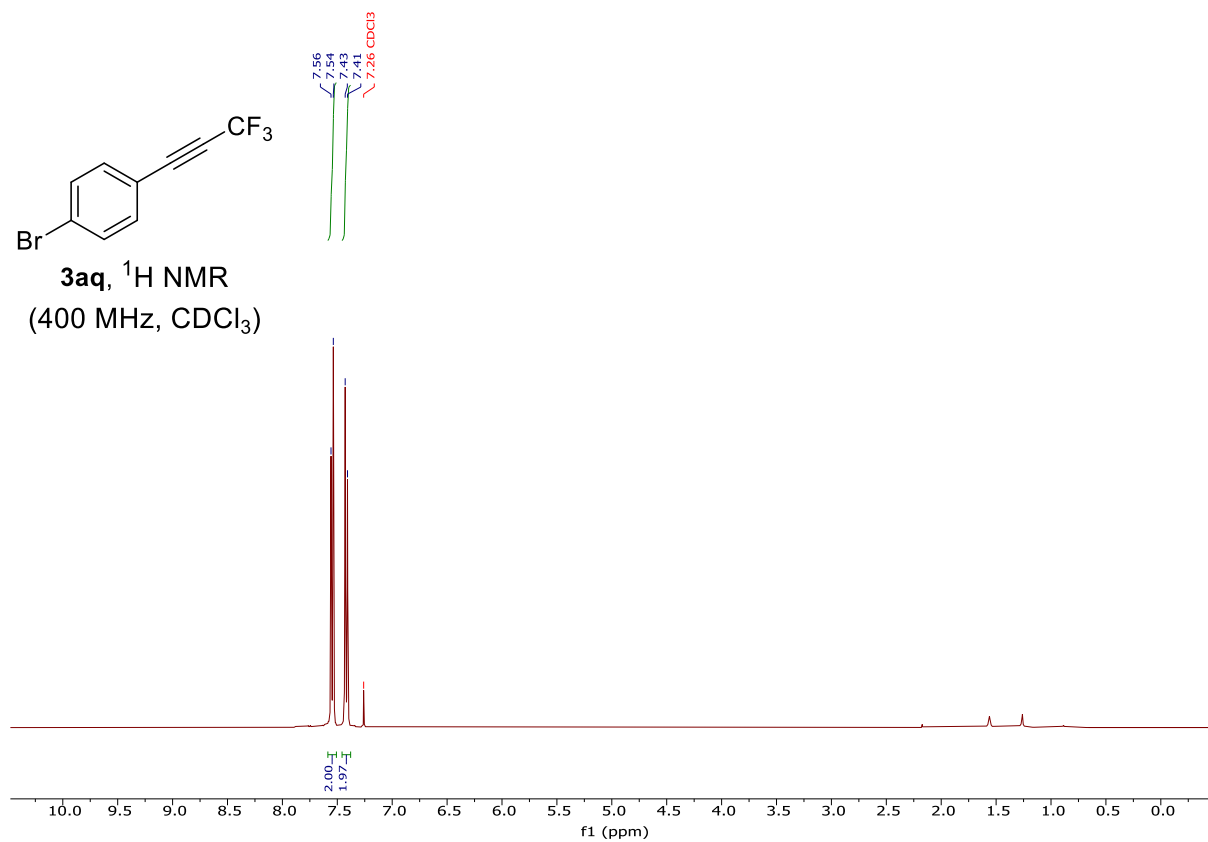

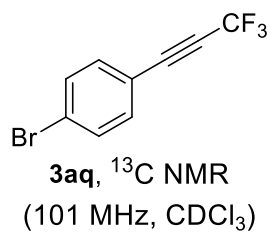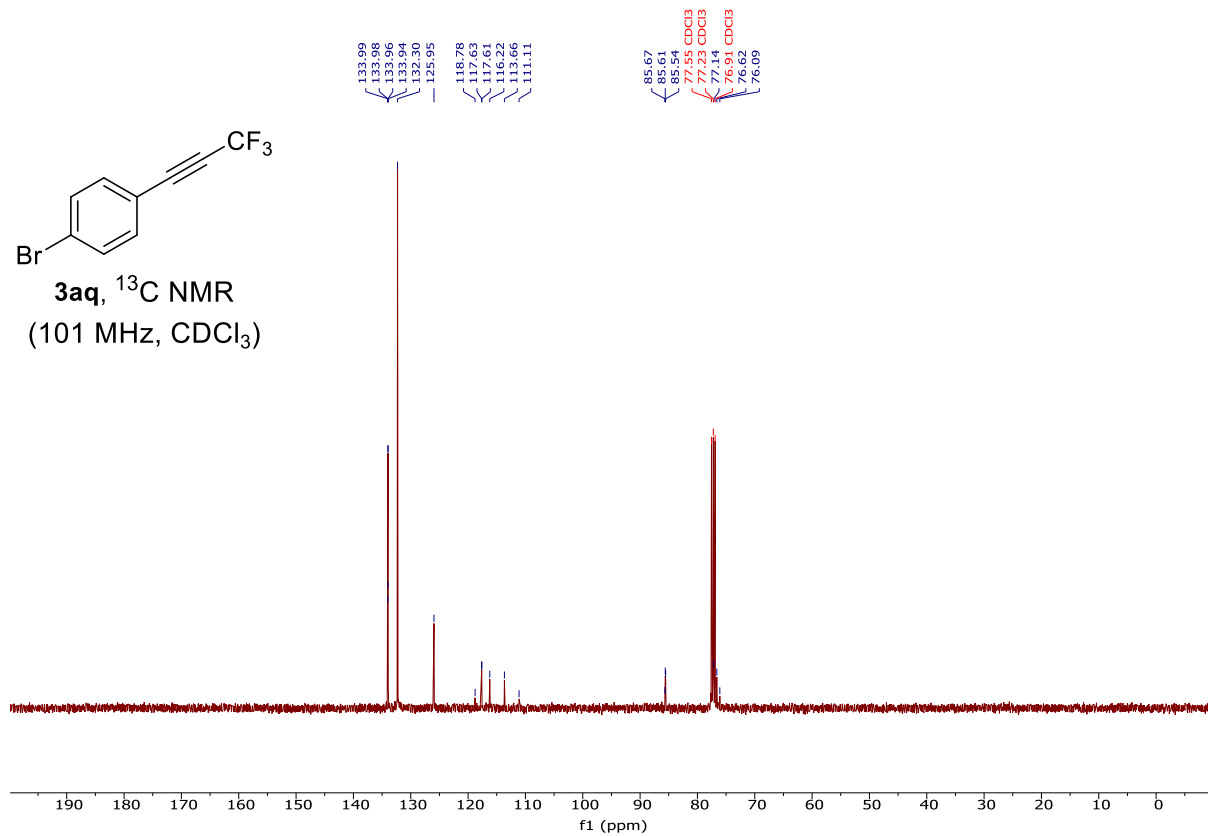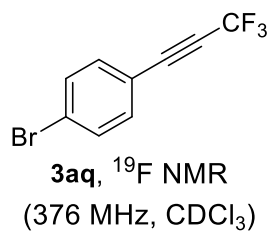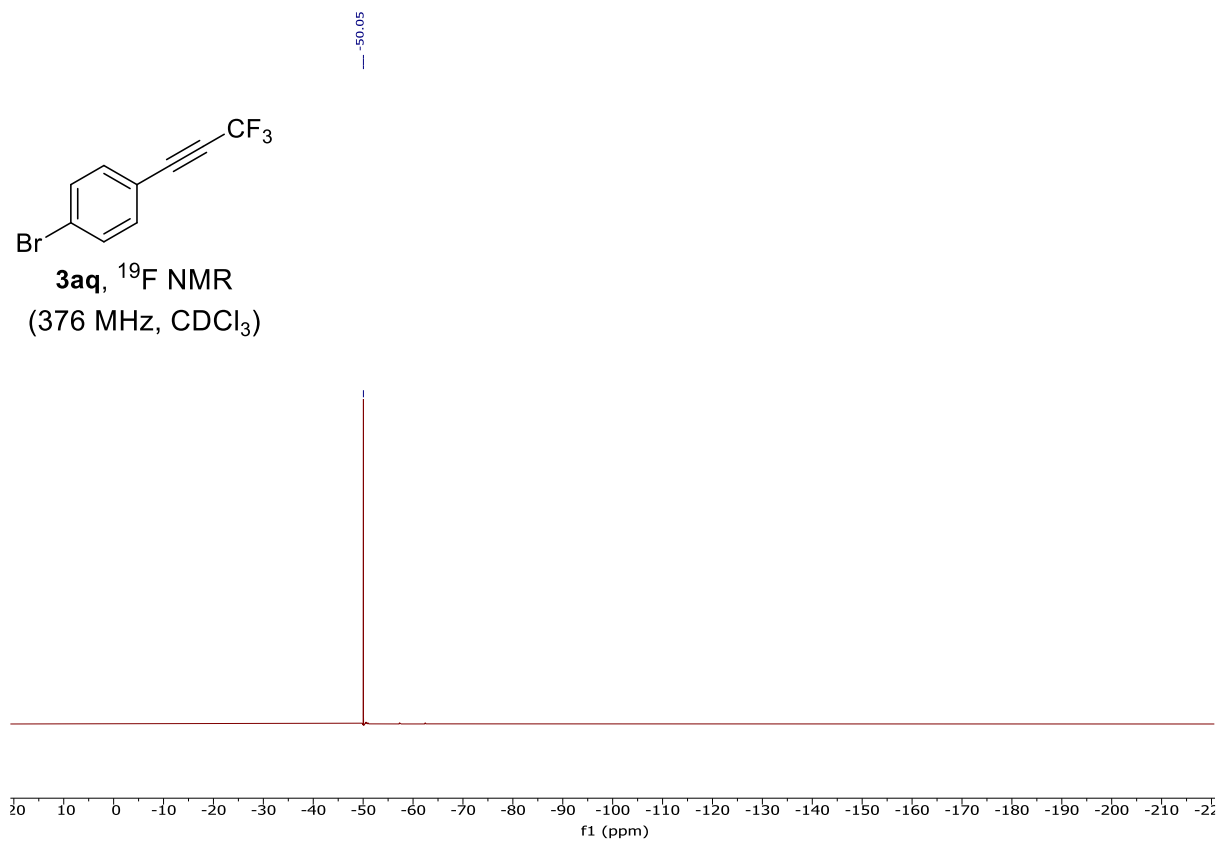



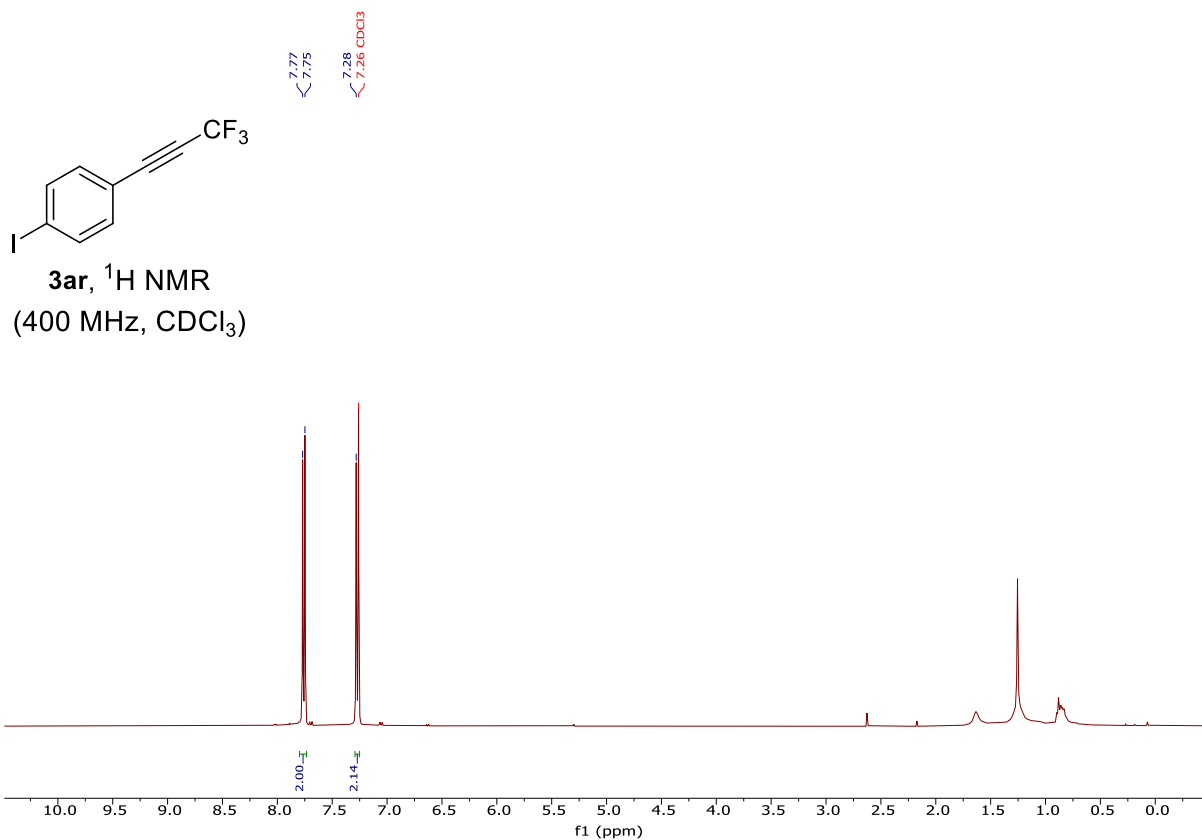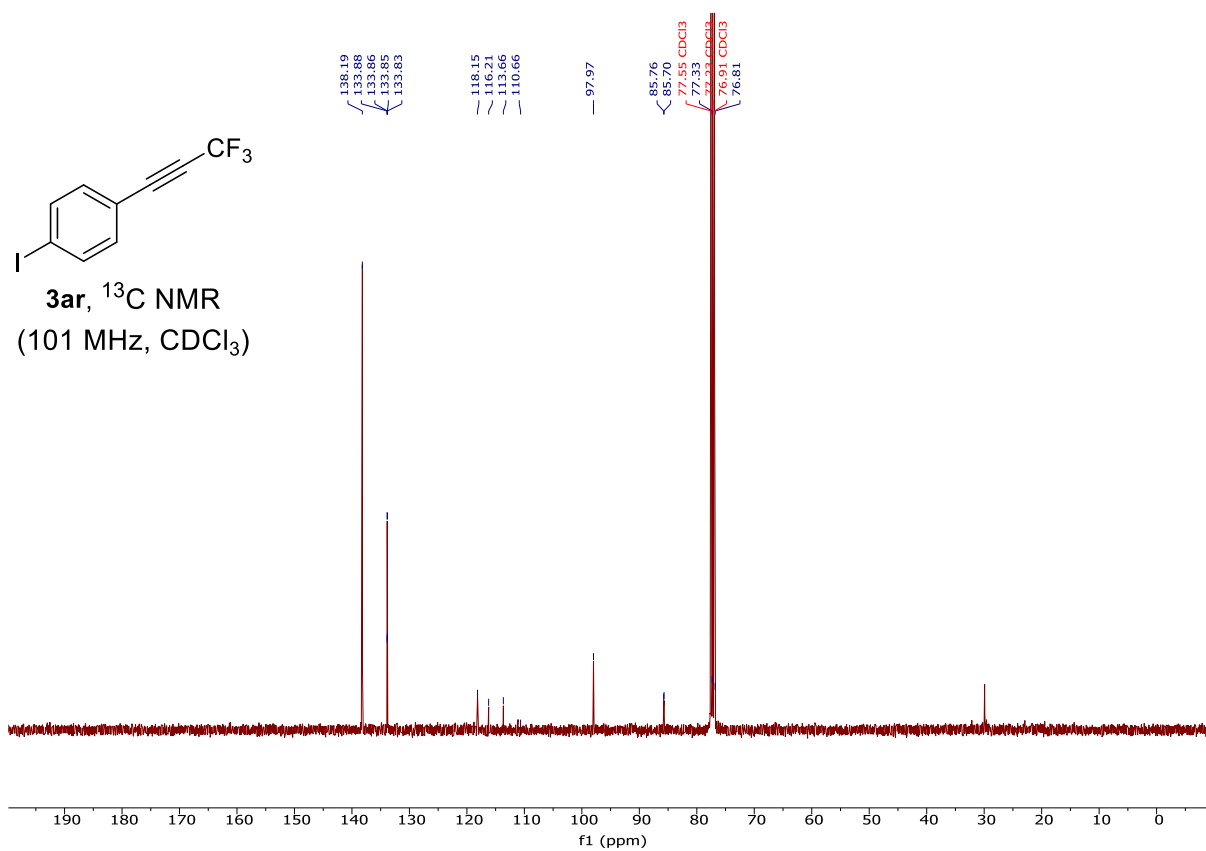

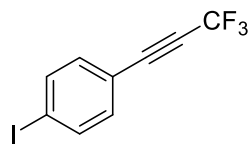

**3ar**,  $^{19}\text{F}$  NMR  
(376 MHz,  $\text{CDCl}_3$ )

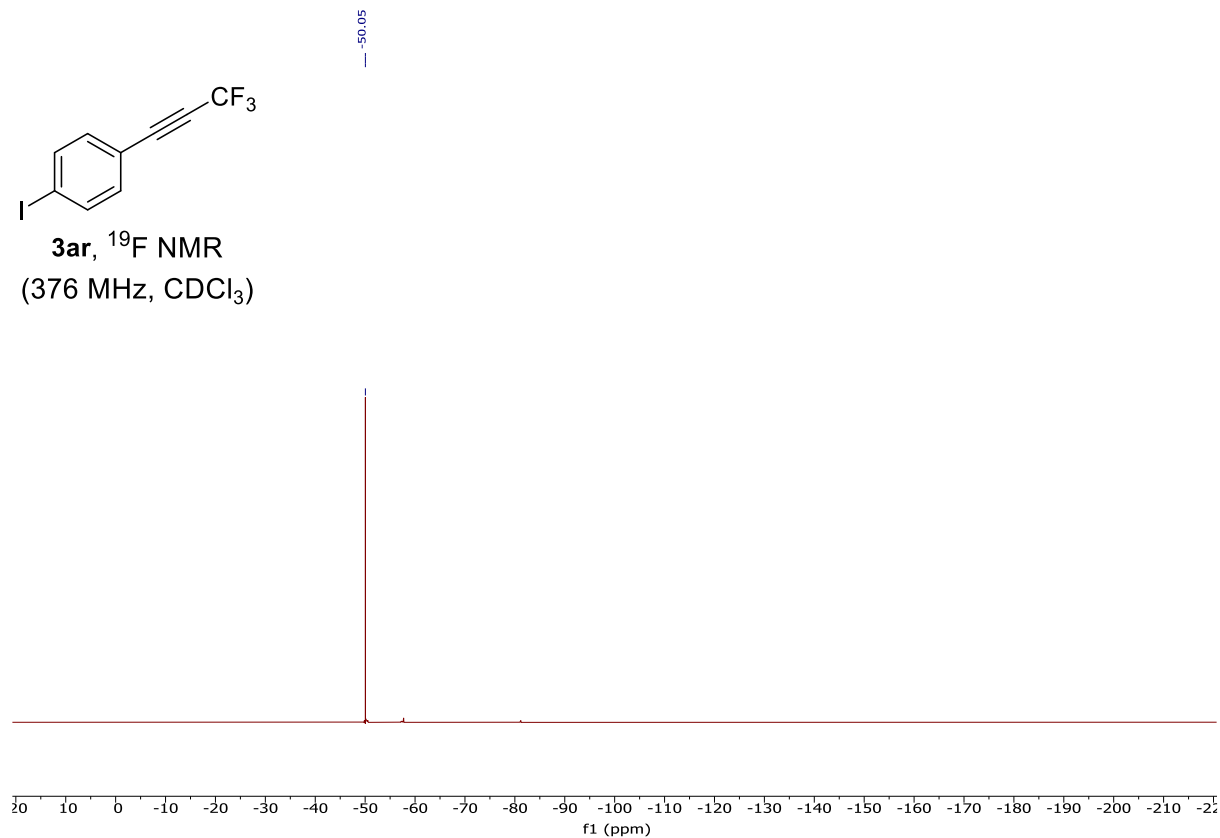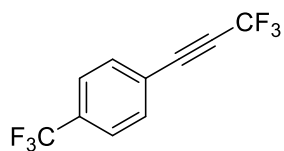

**3as**,  $^1\text{H}$  NMR  
(400 MHz,  $\text{CDCl}_3$ )  
(in pentane and  
diethyl ether residue)

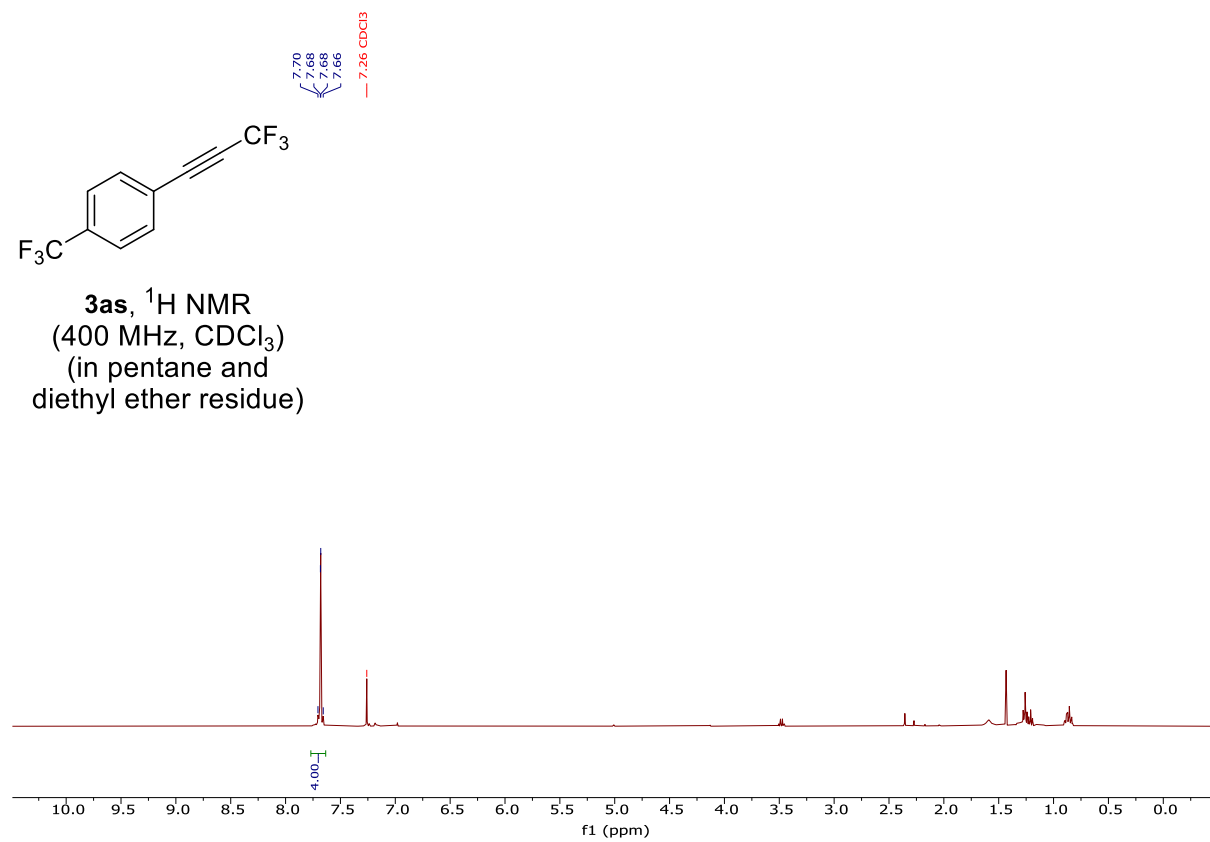

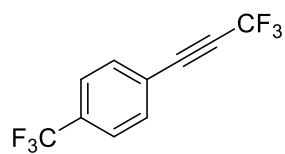

**3as**,  $^{13}\text{C}$  NMR  
 (101 MHz,  $\text{CDCl}_3$ )  
 (in pentane and  
 diethyl ether residue)

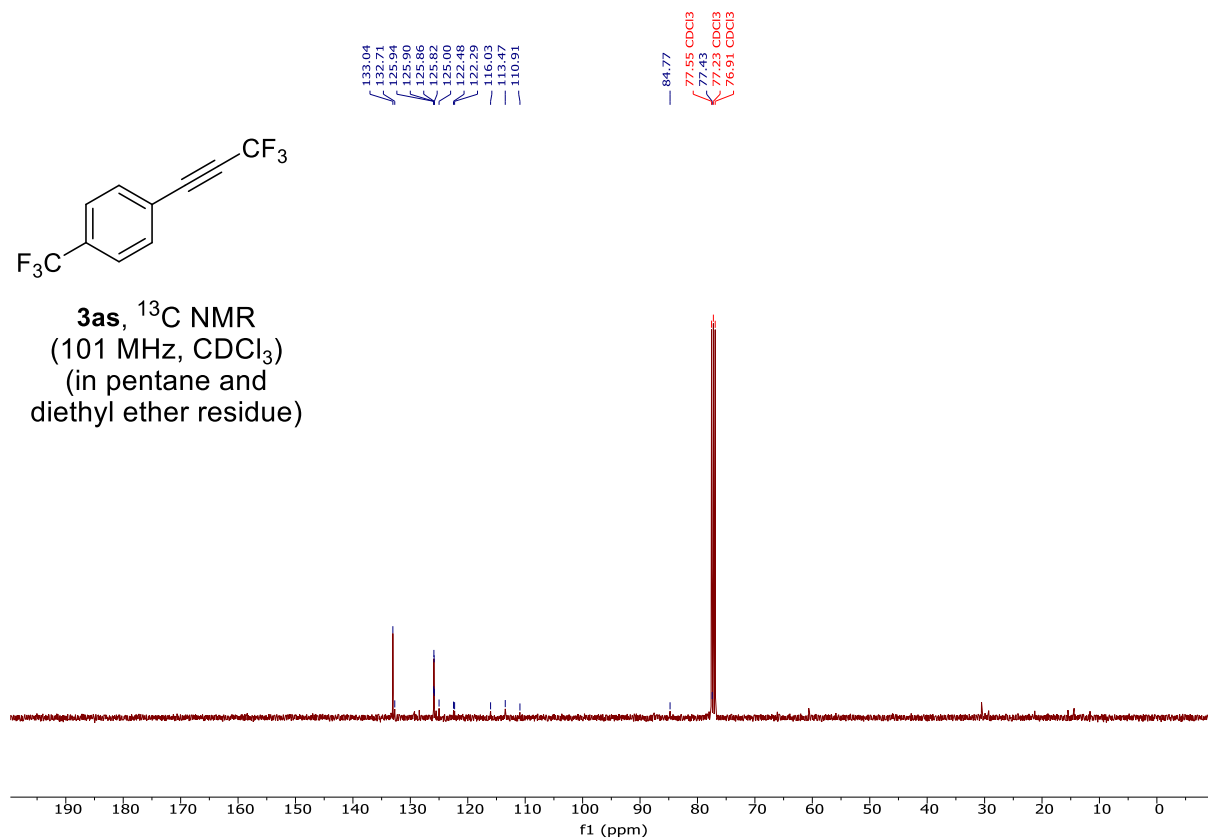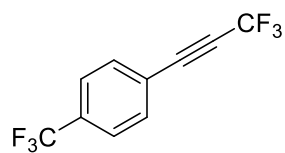

**3as**,  $^{19}\text{F}$  NMR  
 (376 MHz,  $\text{CDCl}_3$ )

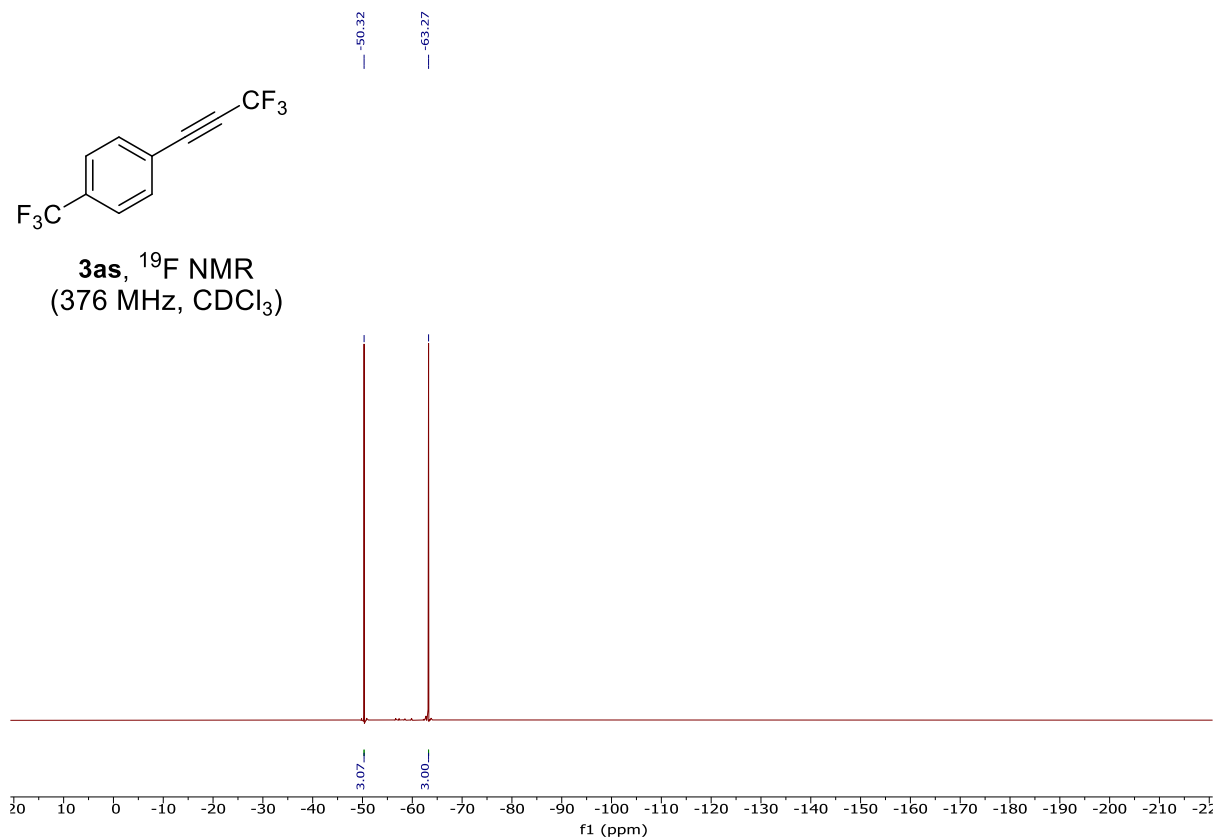

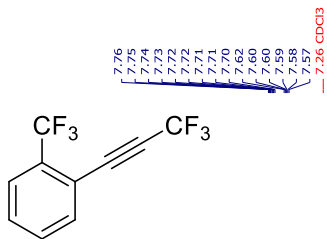

**3at**, <sup>1</sup>H NMR  
(400 MHz, CDCl<sub>3</sub>)  
(in pentane and  
diethyl ether residue)

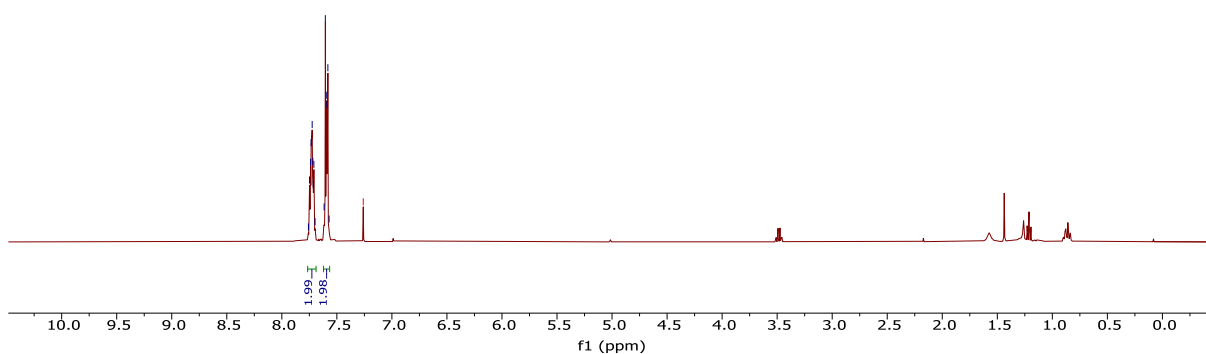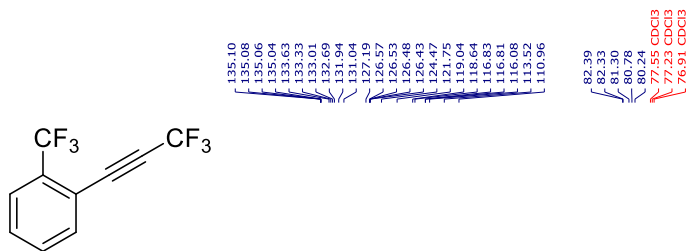

**3at**, <sup>13</sup>C NMR  
(101 MHz, CDCl<sub>3</sub>)  
(in pentane and  
diethyl ether residue)

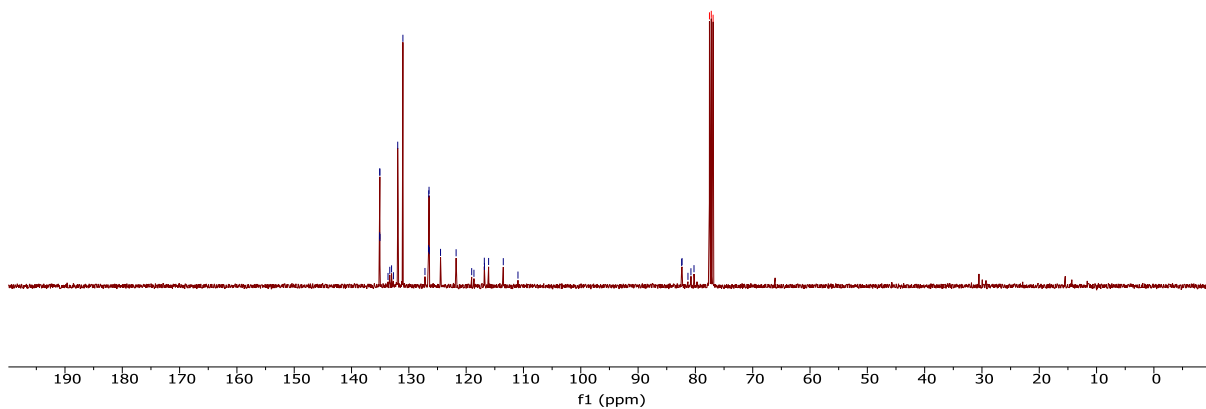

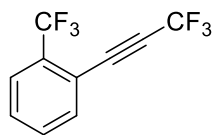

**3at**,  $^{19}\text{F}$  NMR  
(376 MHz,  $\text{CDCl}_3$ )

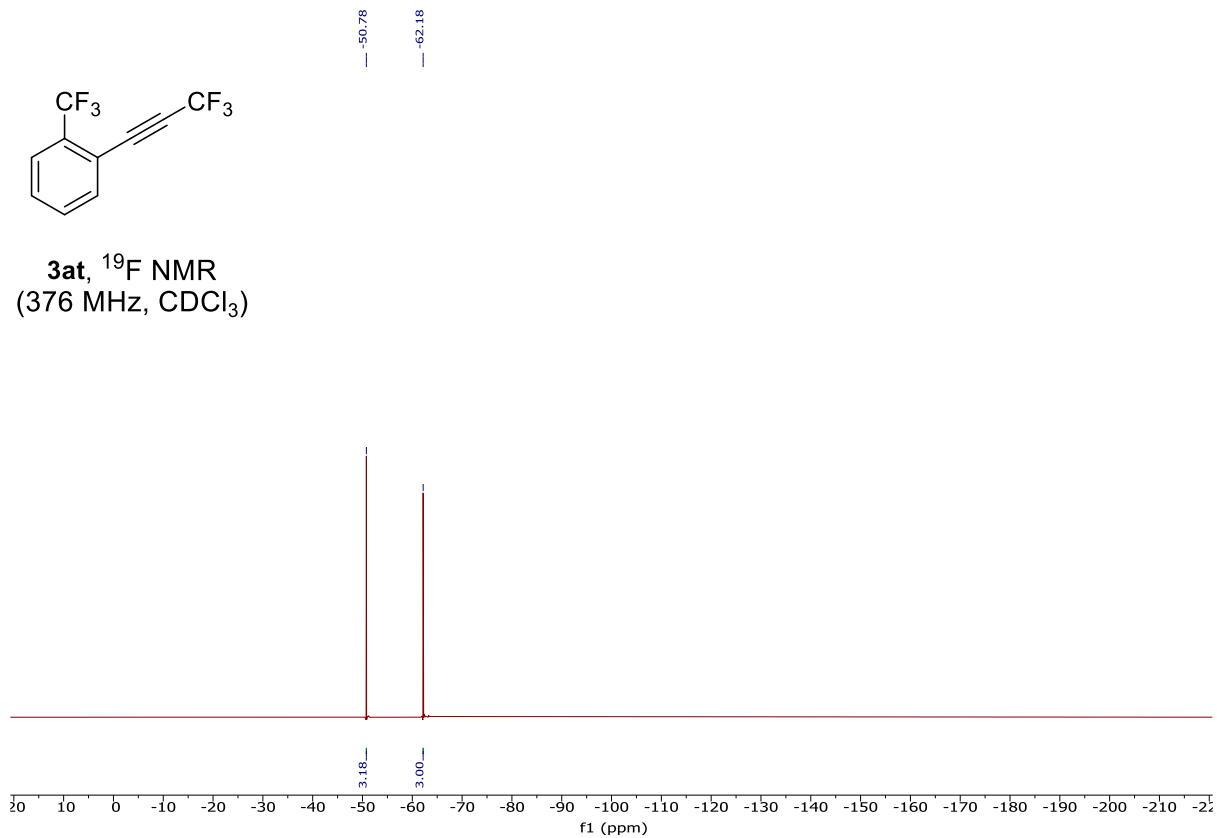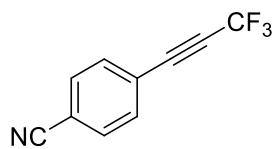

**3au**,  $^1\text{H}$  NMR  
(400 MHz,  $\text{CDCl}_3$ )

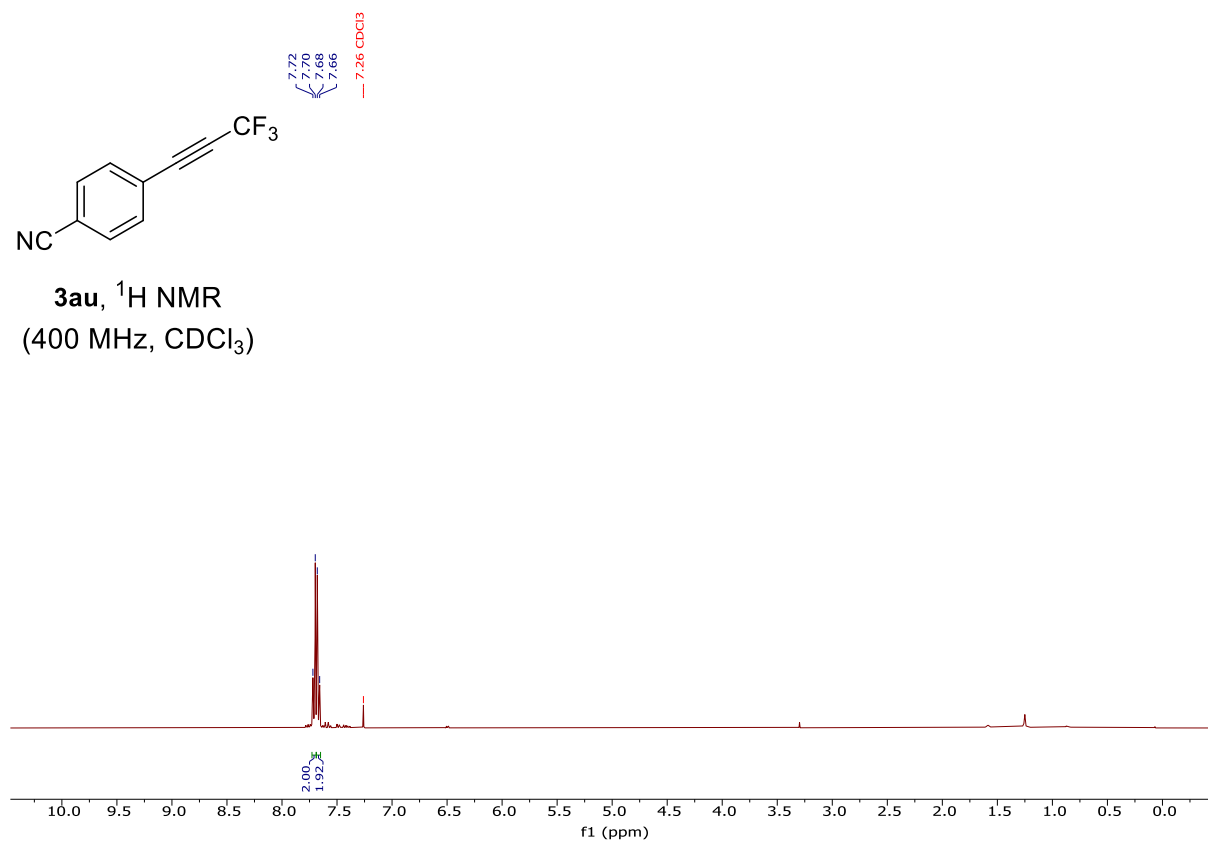

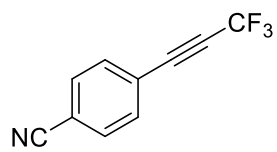

**3au**,  $^{13}\text{C}$  NMR  
(101 MHz,  $\text{CDCl}_3$ )

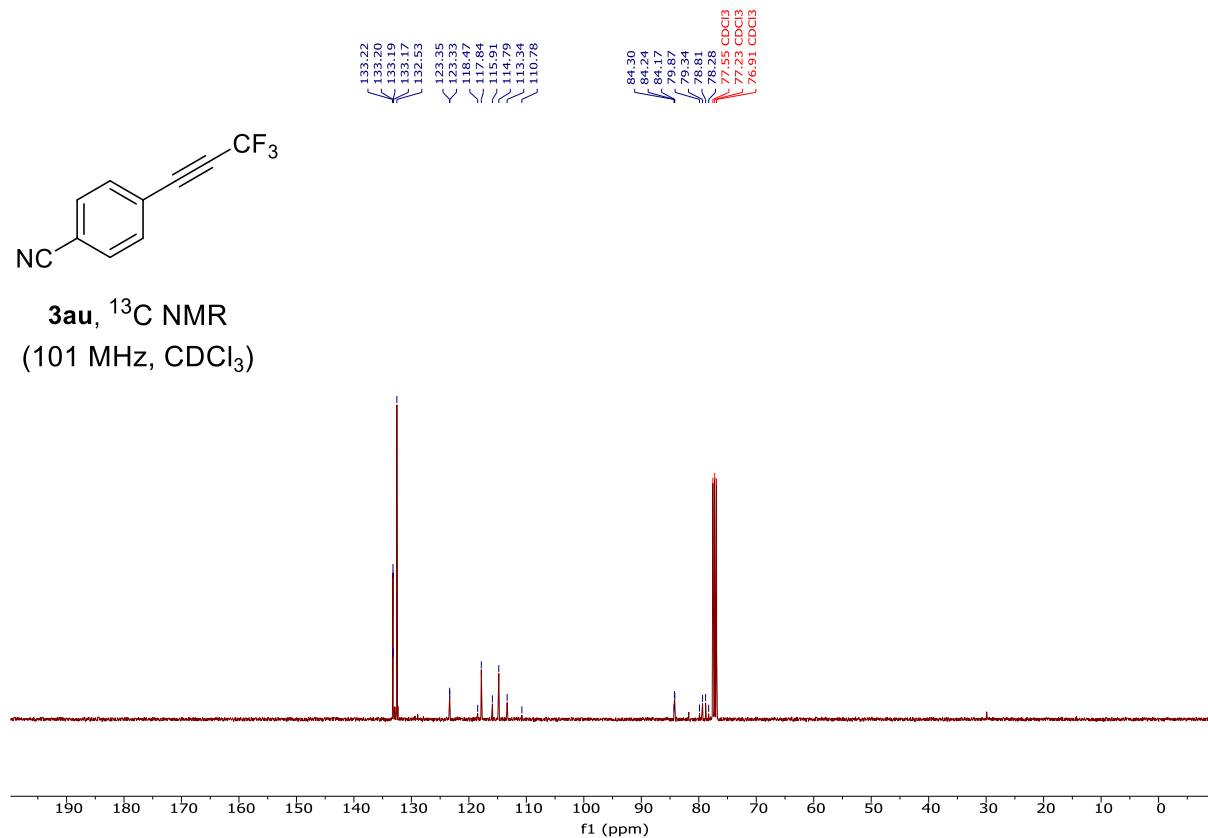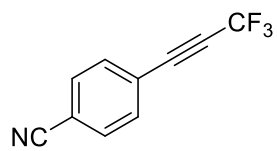

**3au**,  $^{19}\text{F}$  NMR  
(376 MHz,  $\text{CDCl}_3$ )

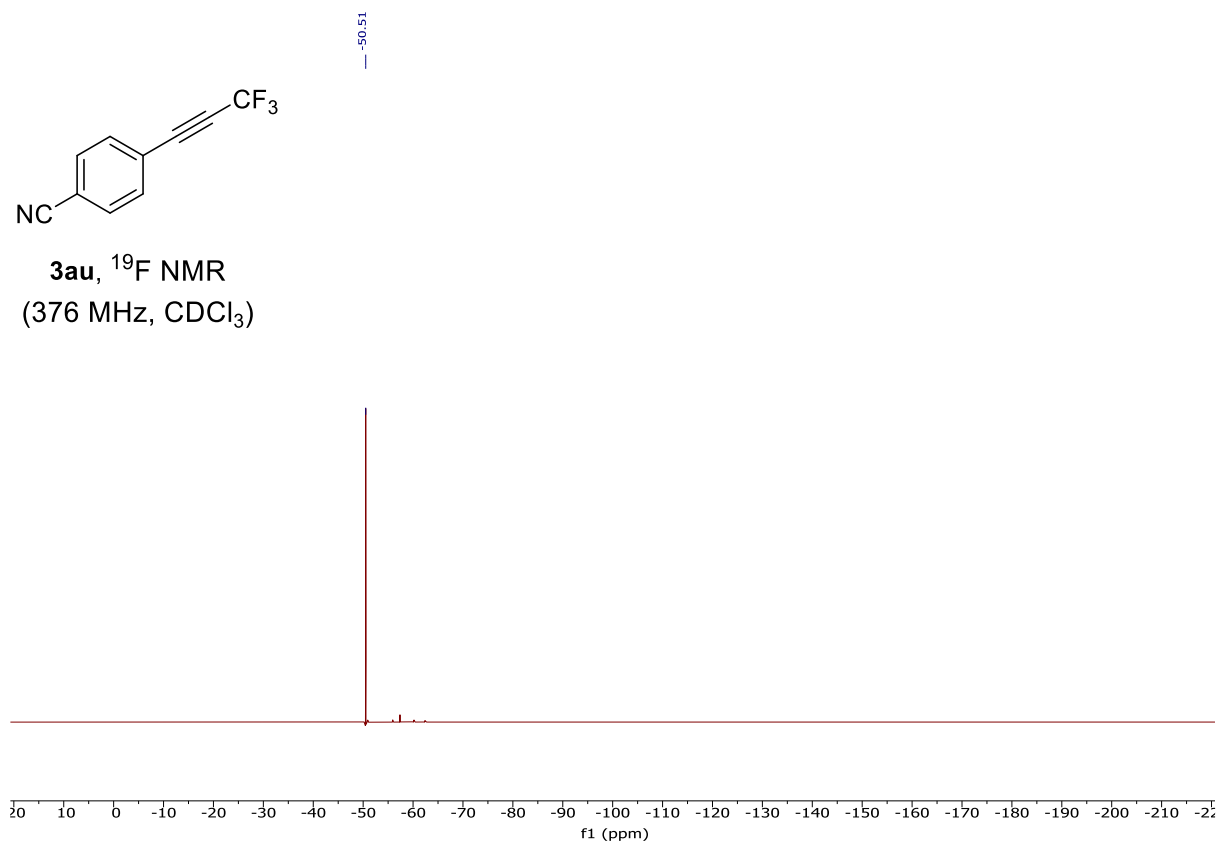

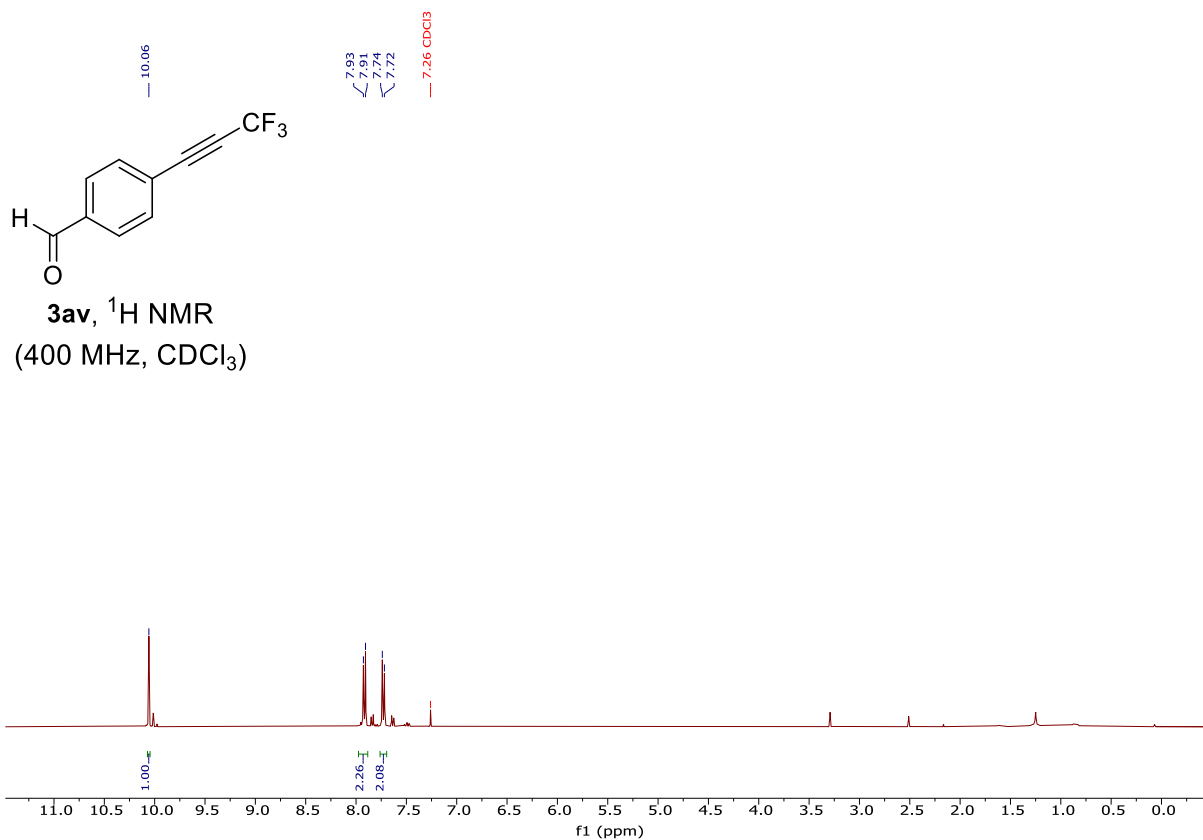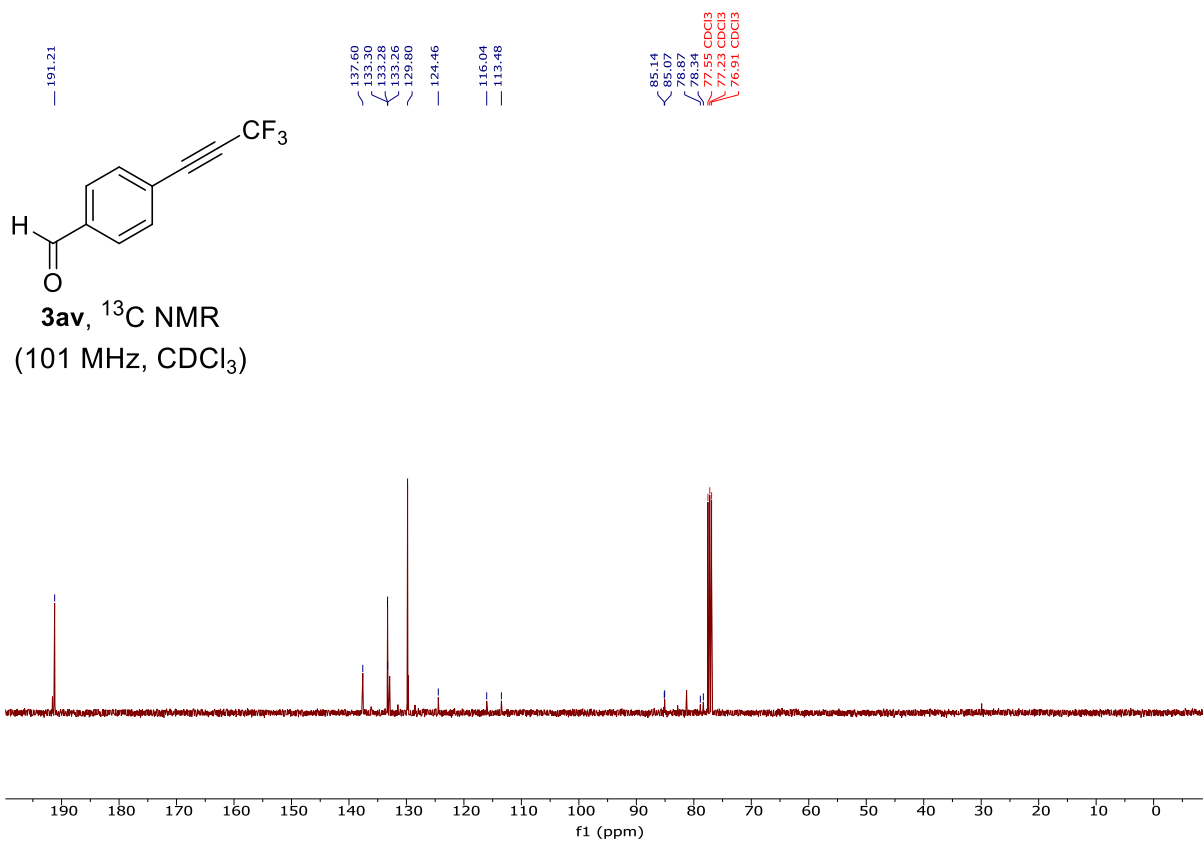

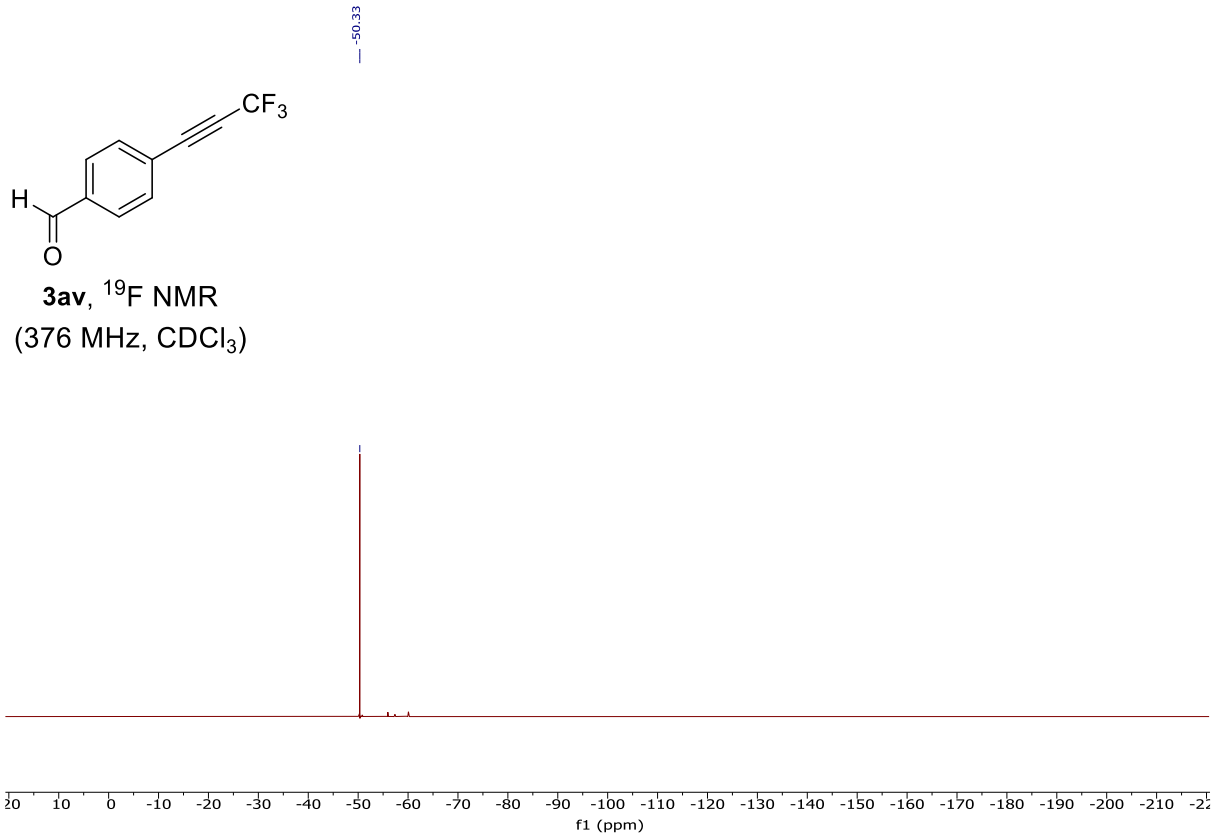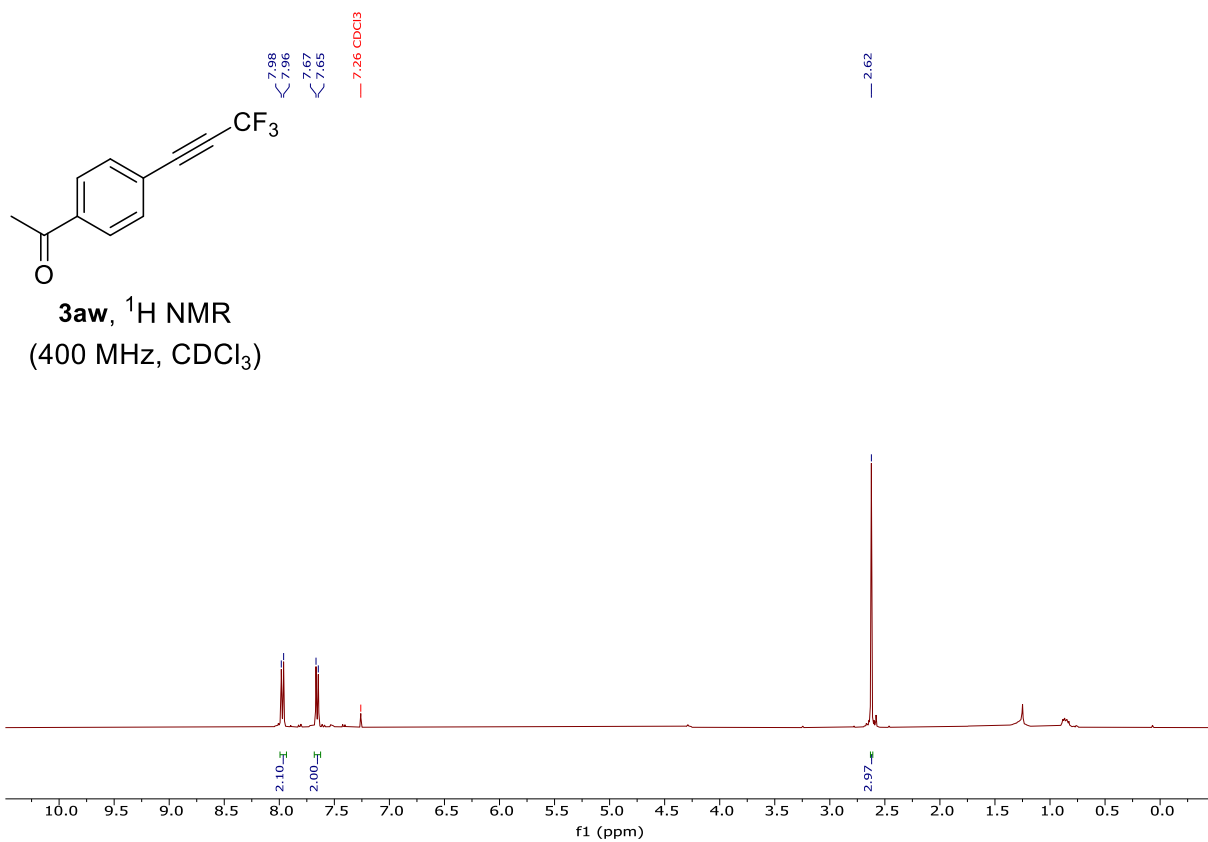



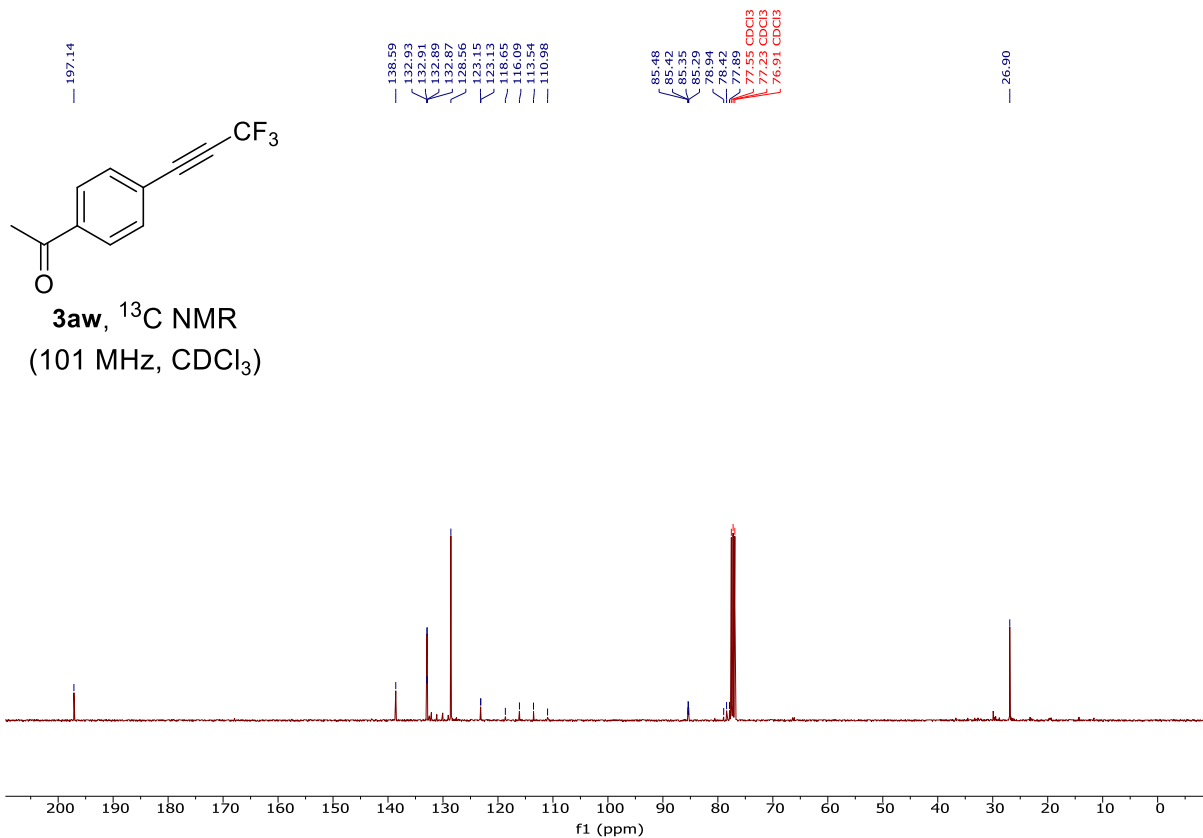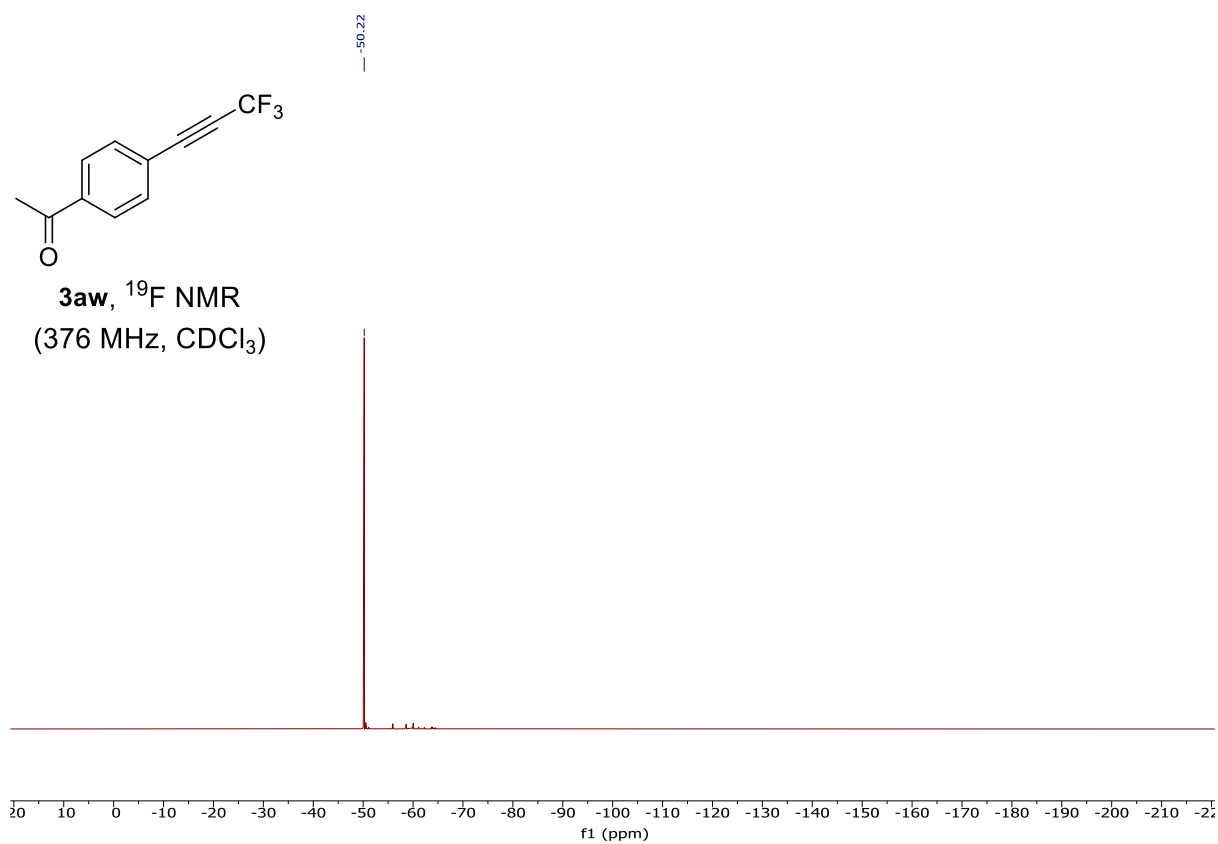

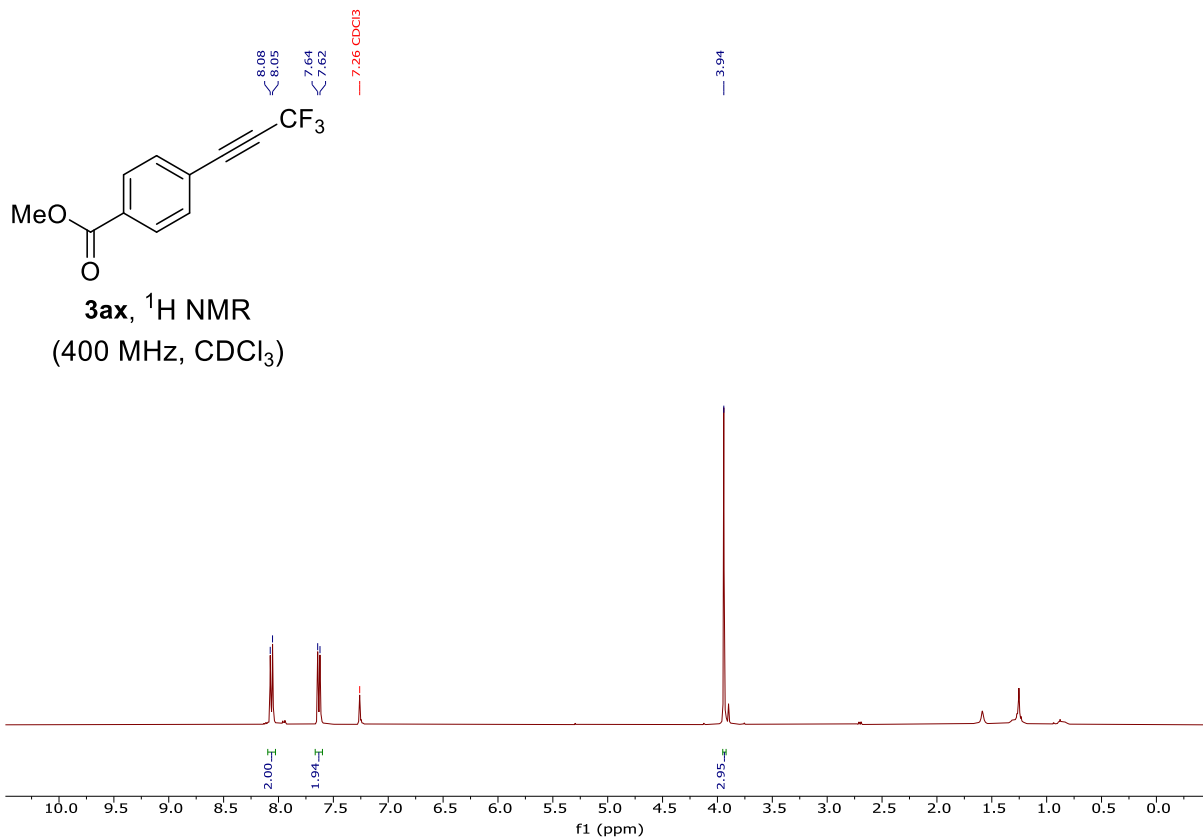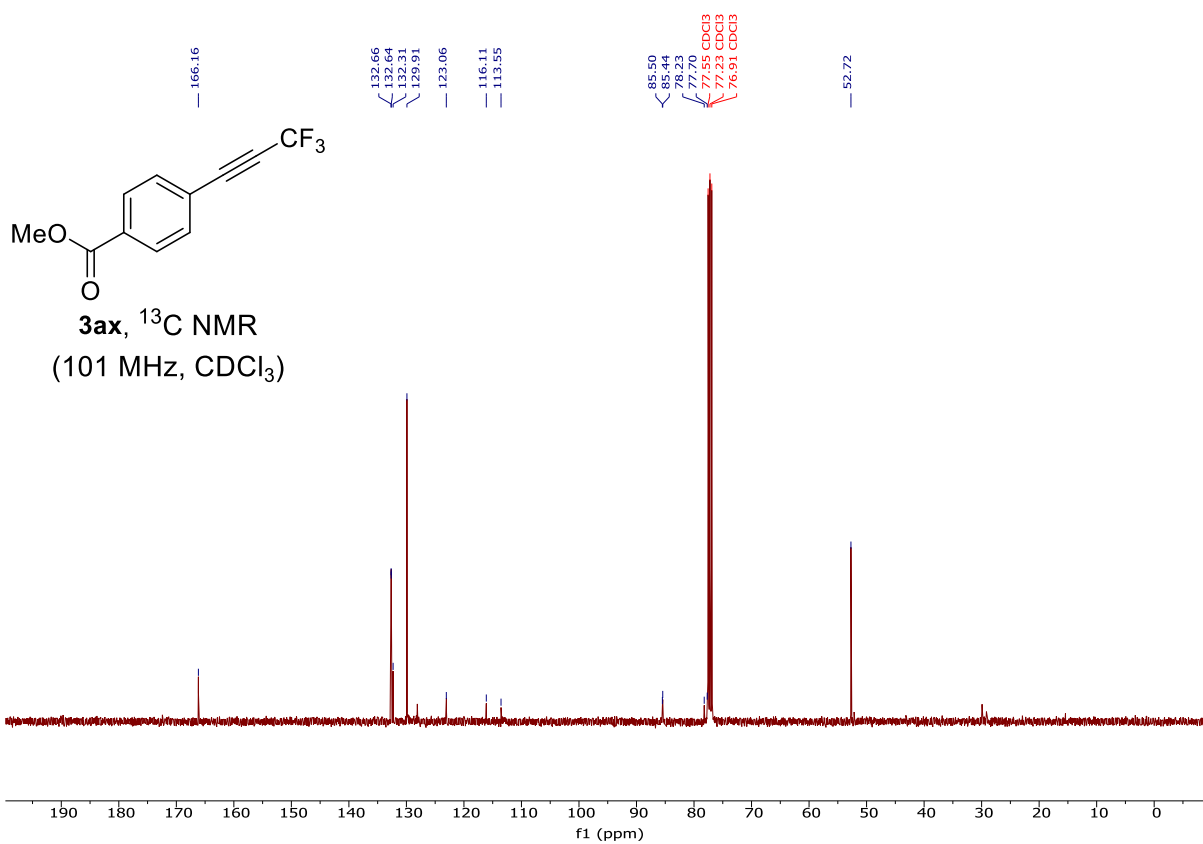

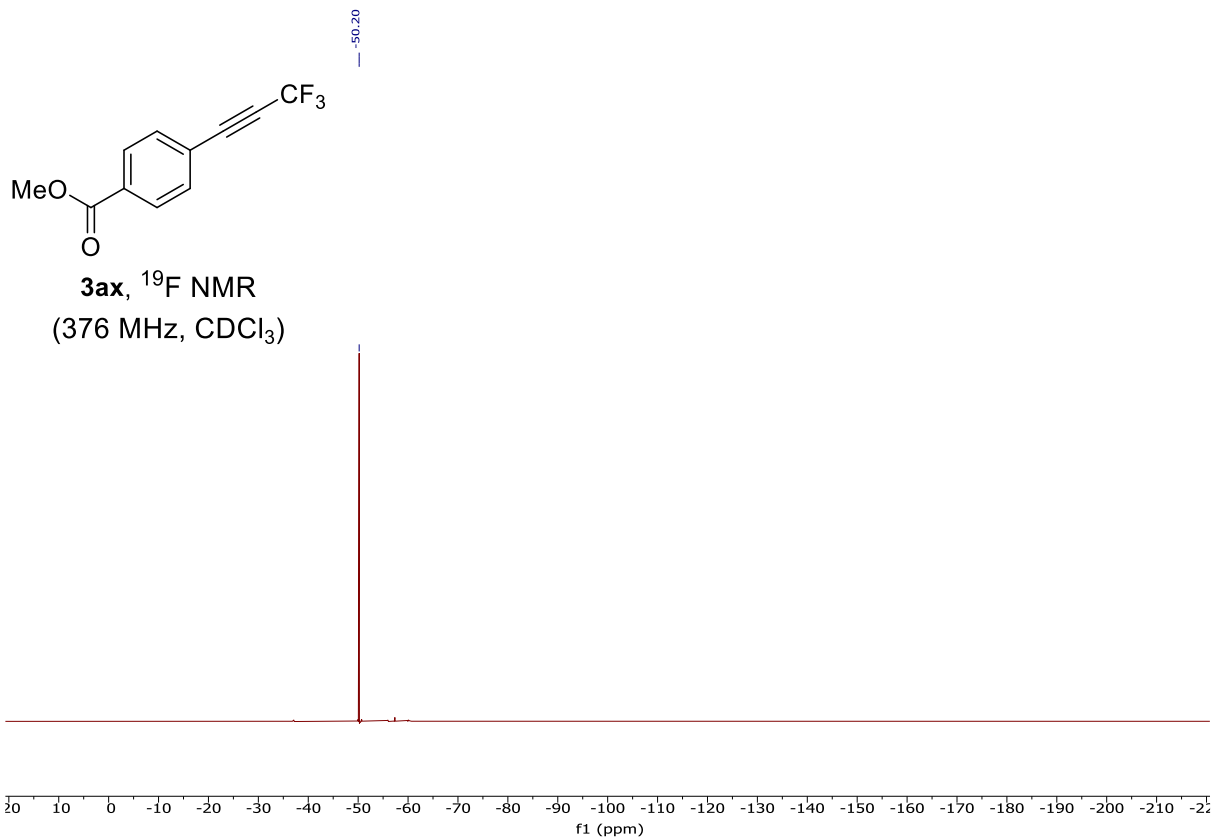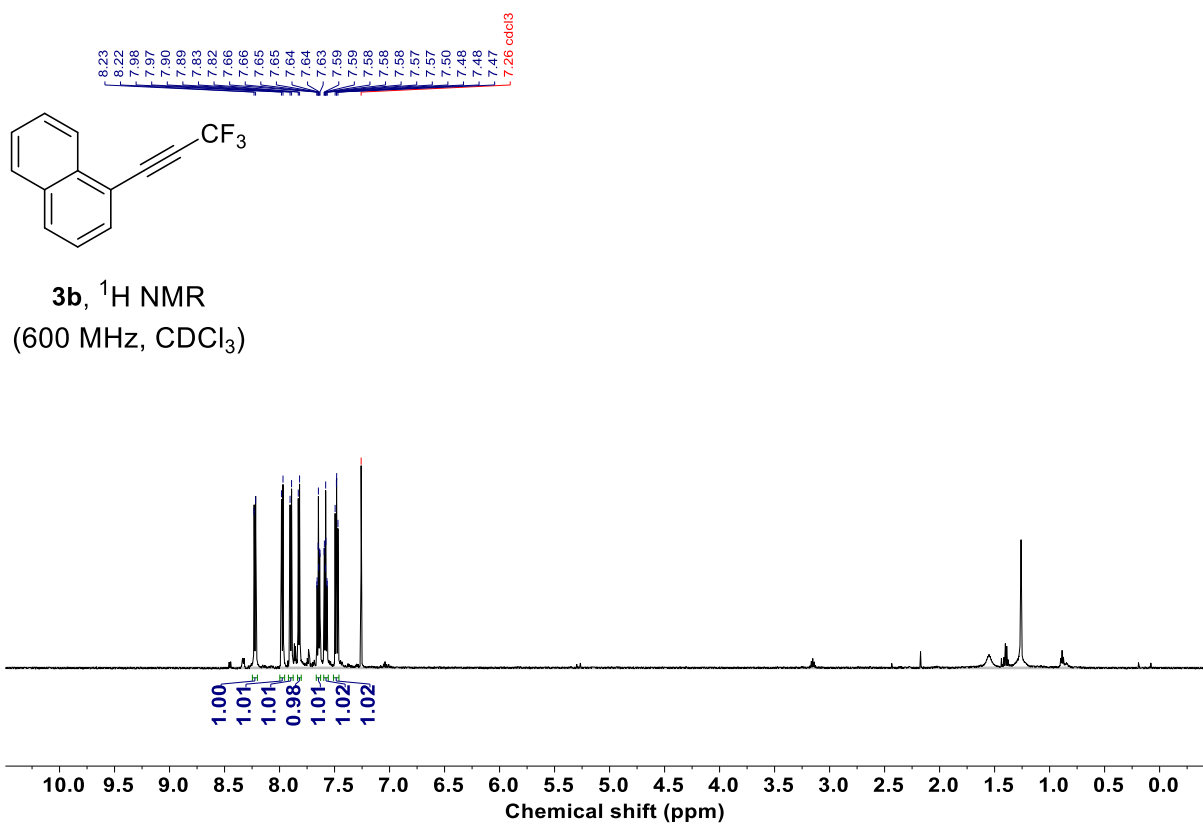

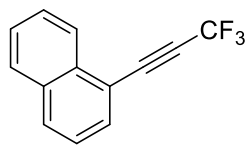

**3b**,  $^{13}\text{C}$  NMR  
(151 MHz,  $\text{CDCl}_3$ )

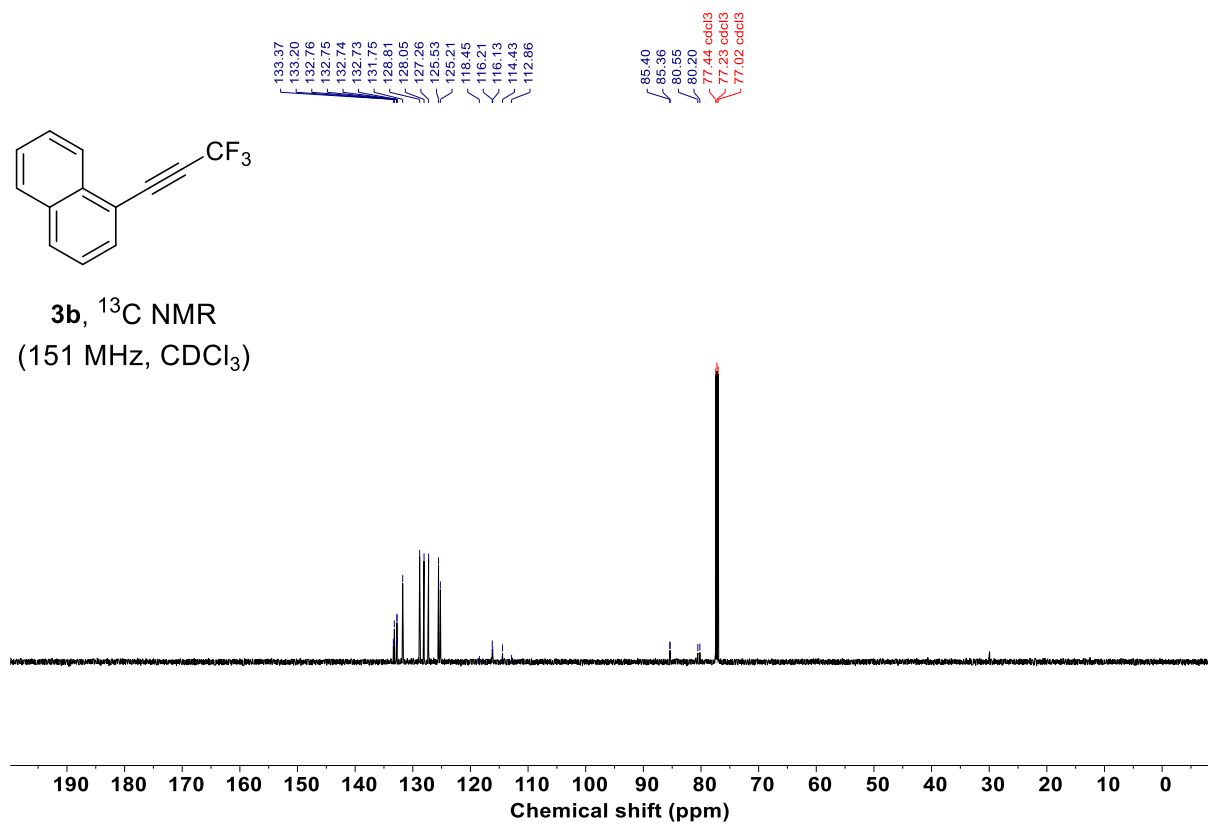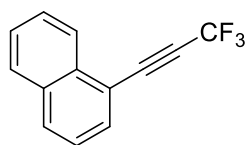

**3b**,  $^{19}\text{F}$  NMR  
(564 MHz,  $\text{CDCl}_3$ )

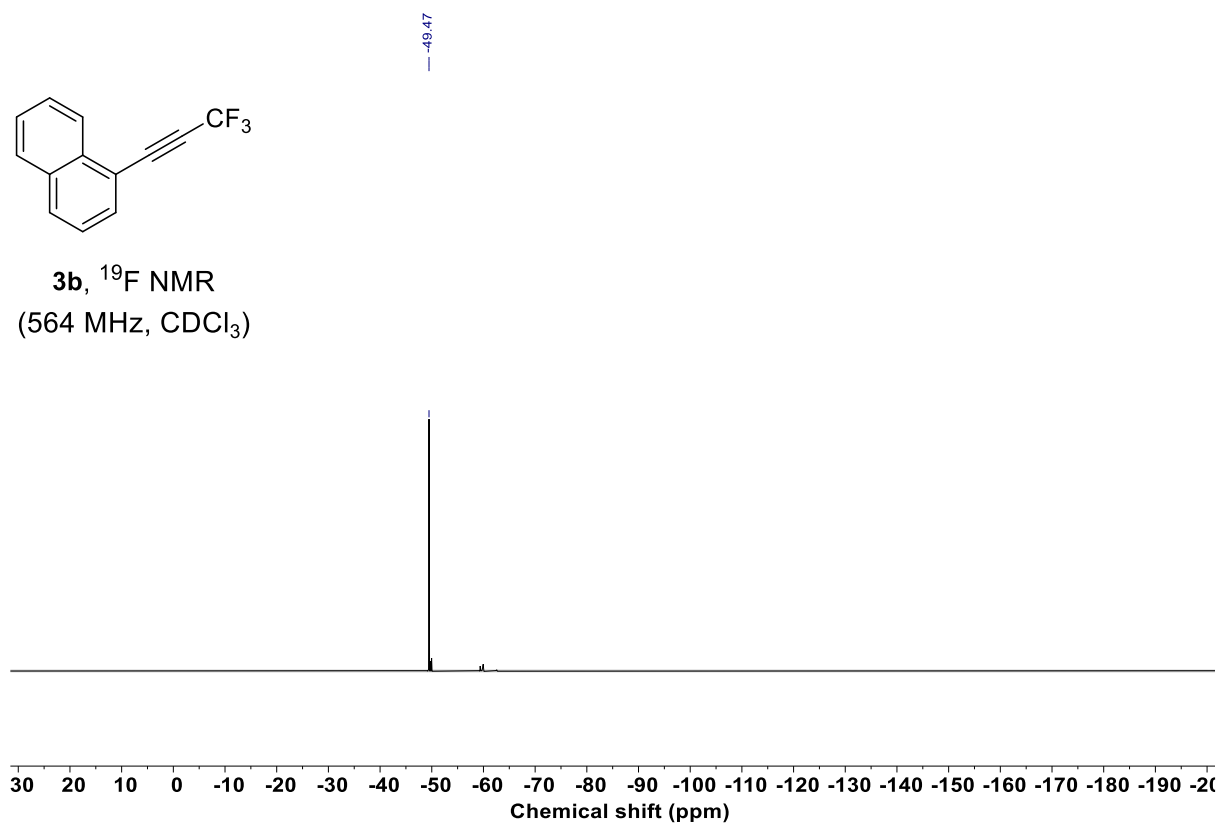

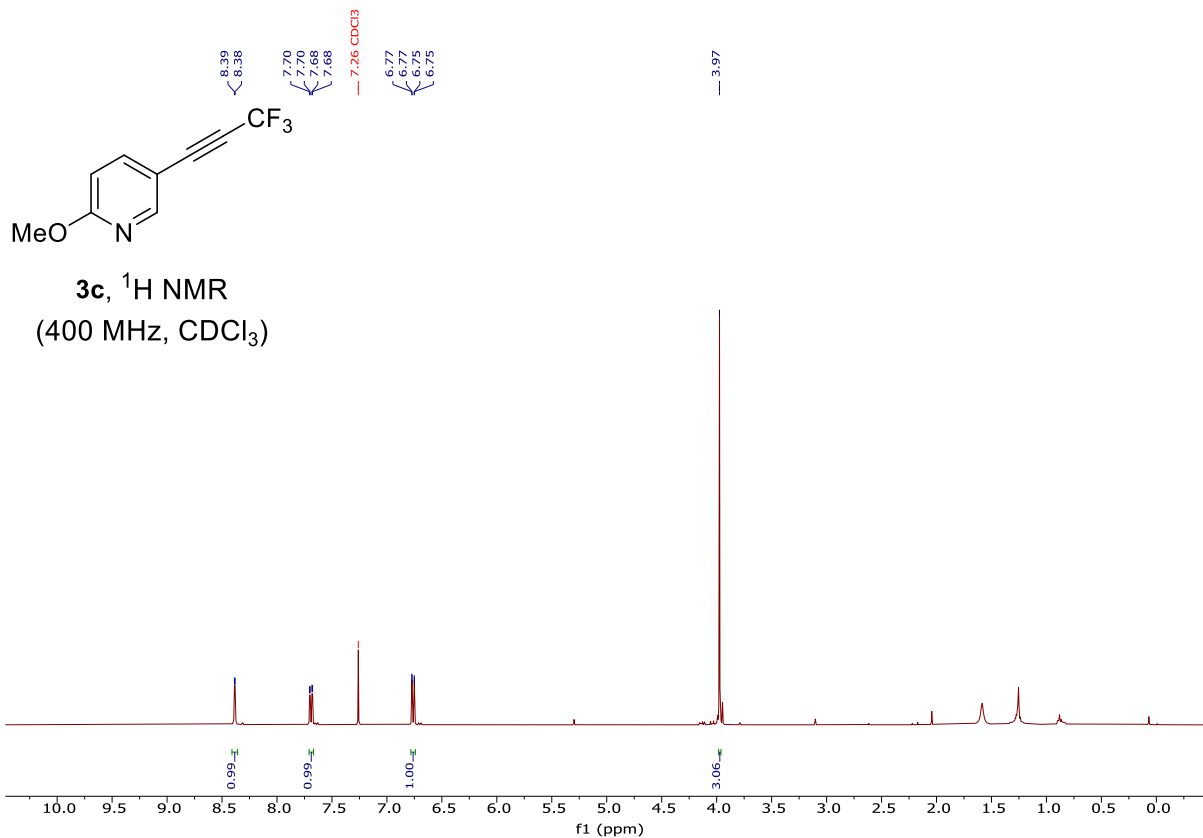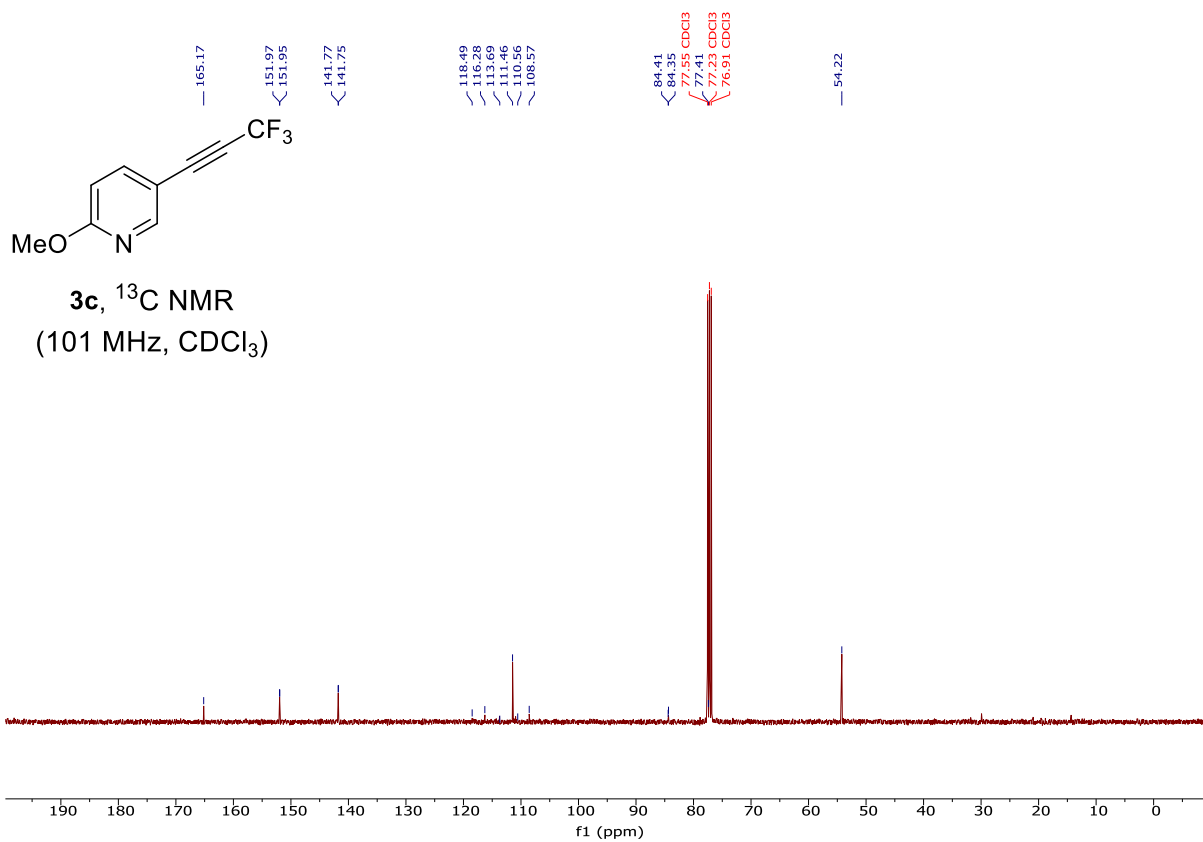

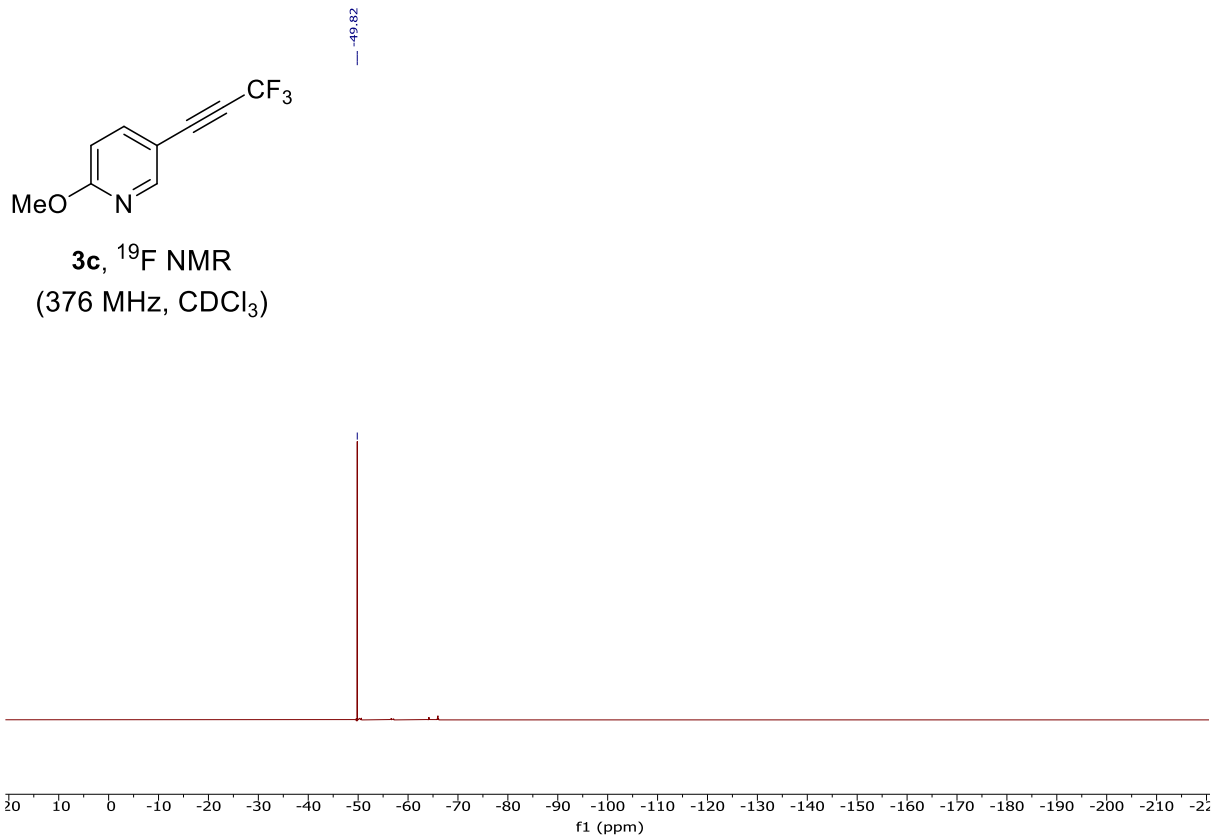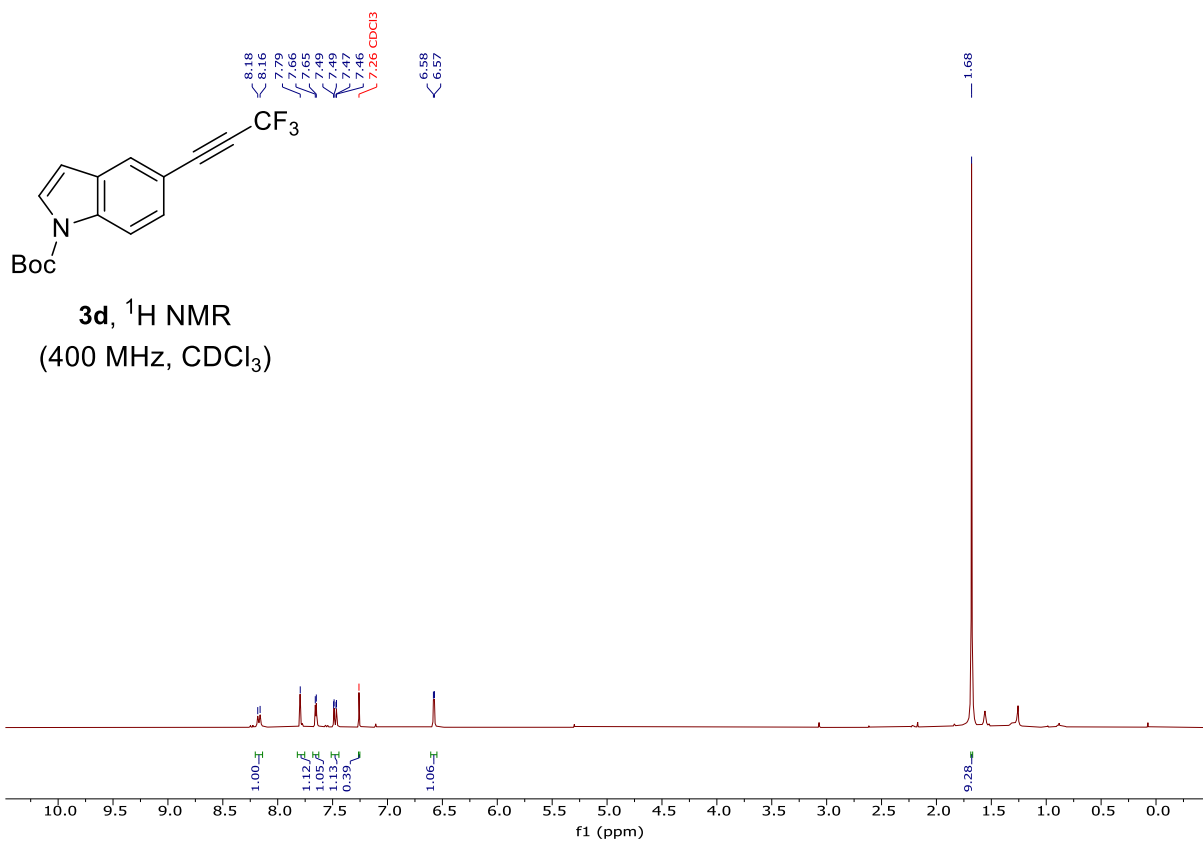

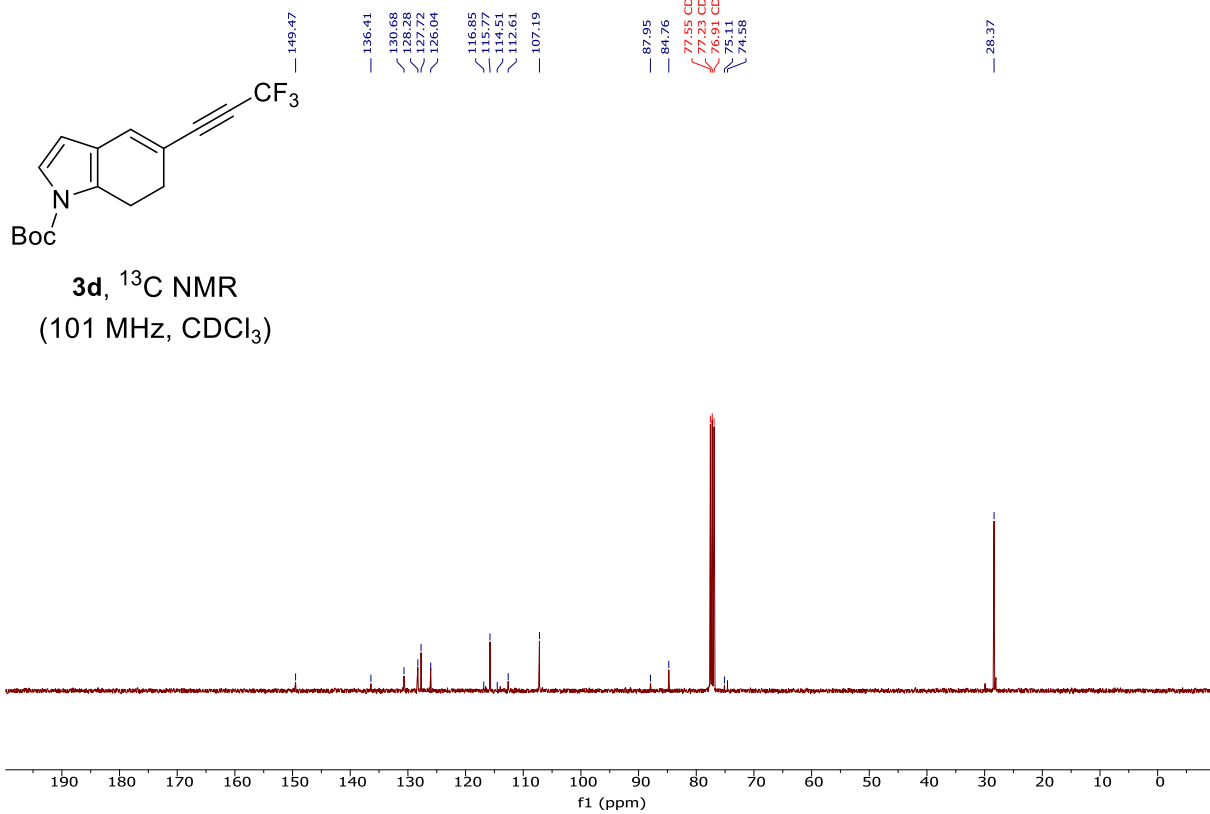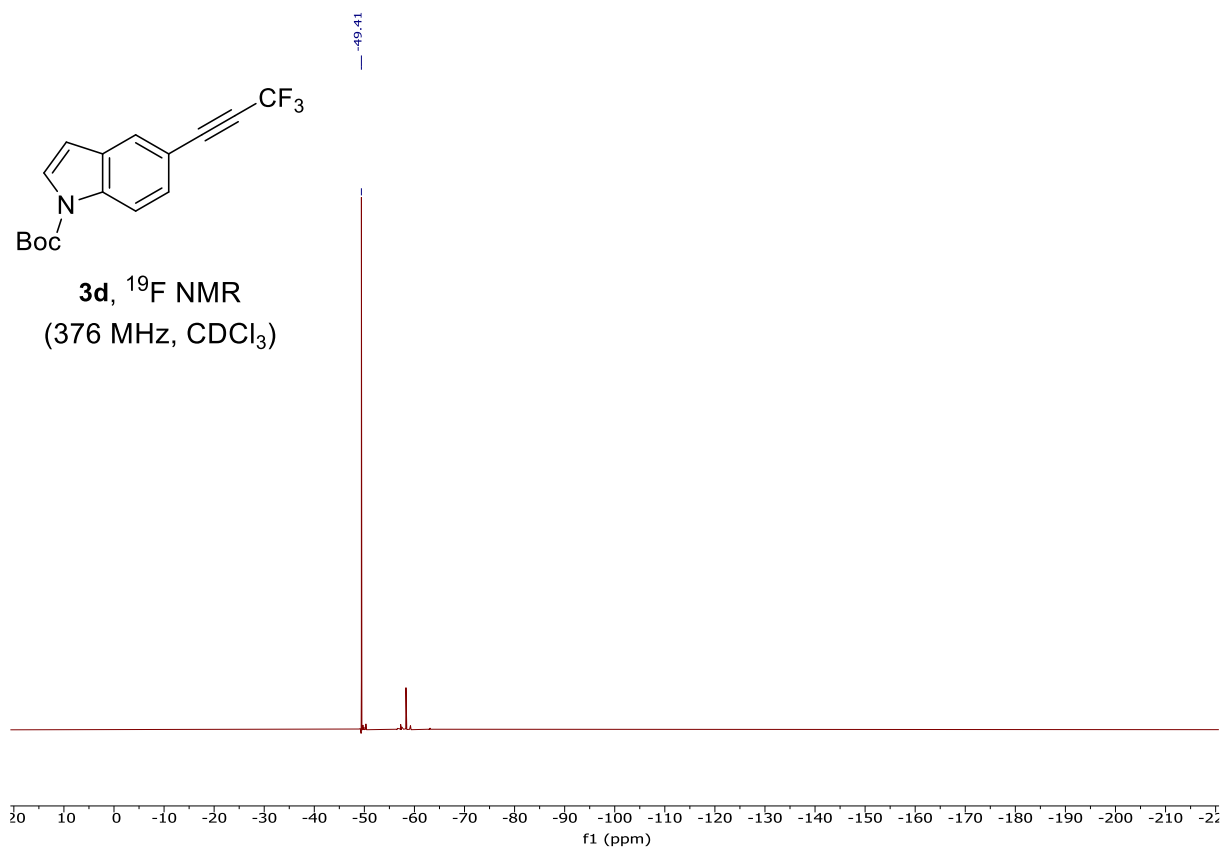

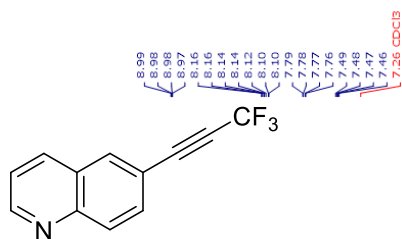

**3e, <sup>1</sup>H NMR**  
(400 MHz, CDCl<sub>3</sub>)

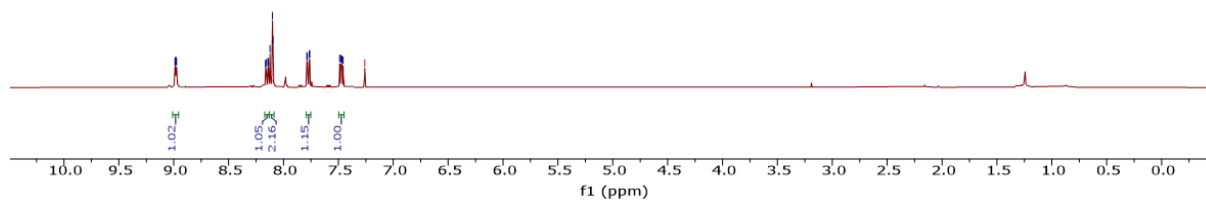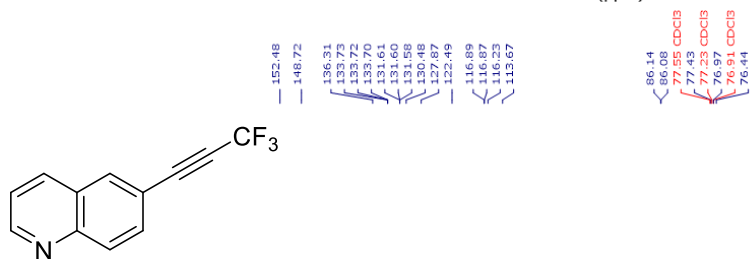

**3e, <sup>13</sup>C NMR**  
(101 MHz, CDCl<sub>3</sub>)

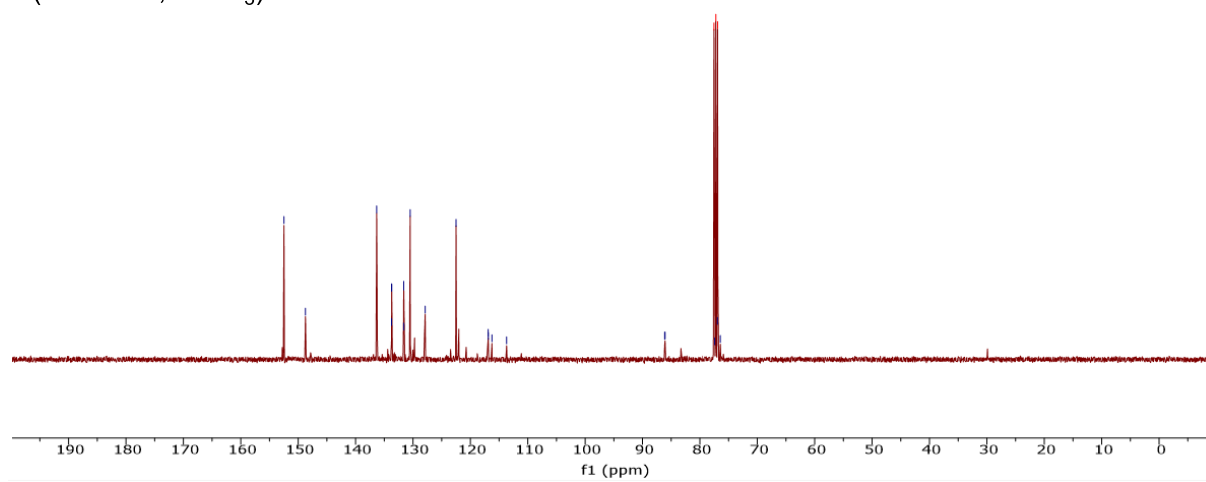



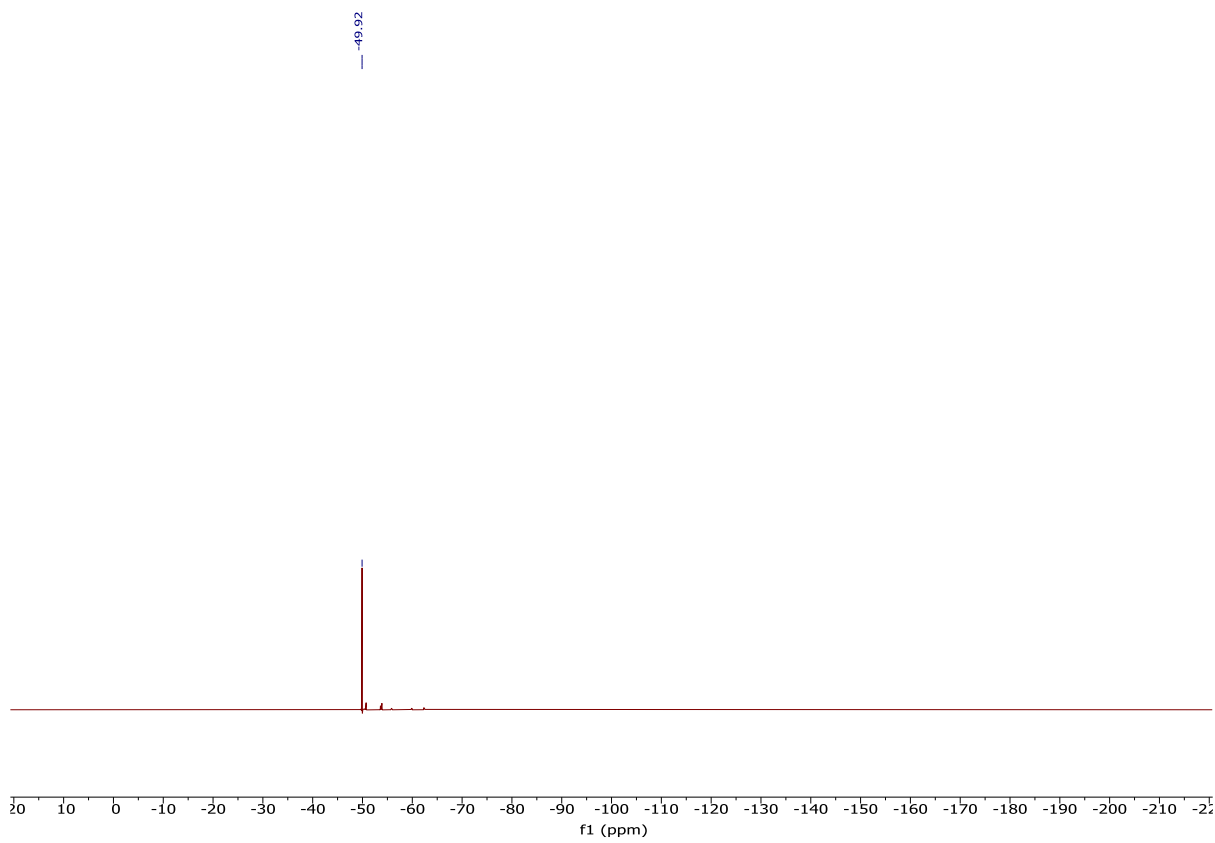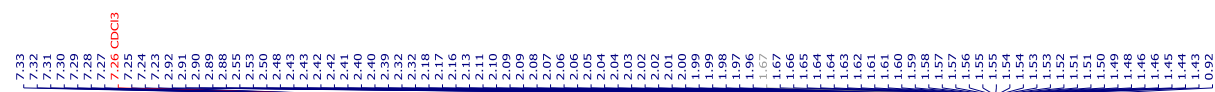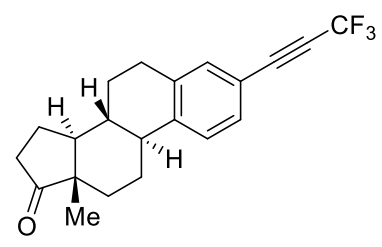

**3f, <sup>1</sup>H NMR**  
(400 MHz, CDCl<sub>3</sub>)

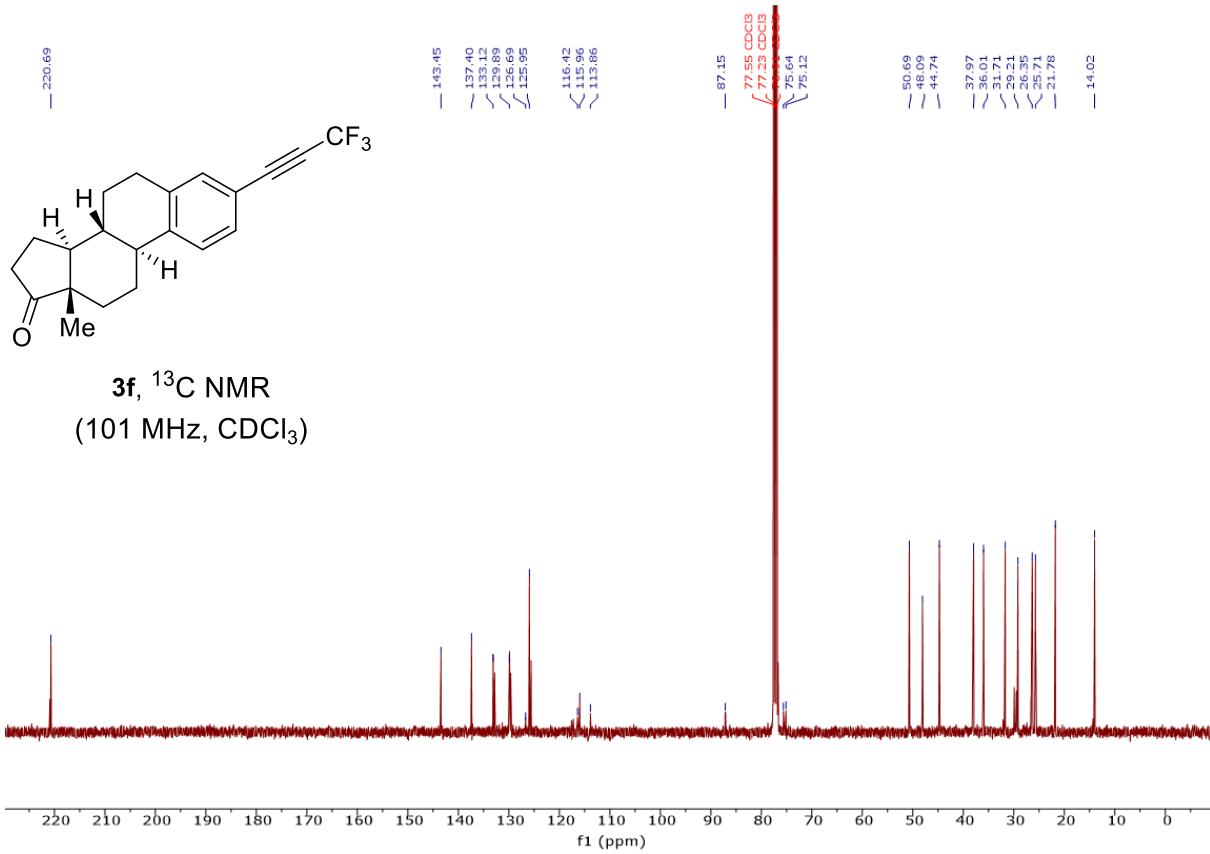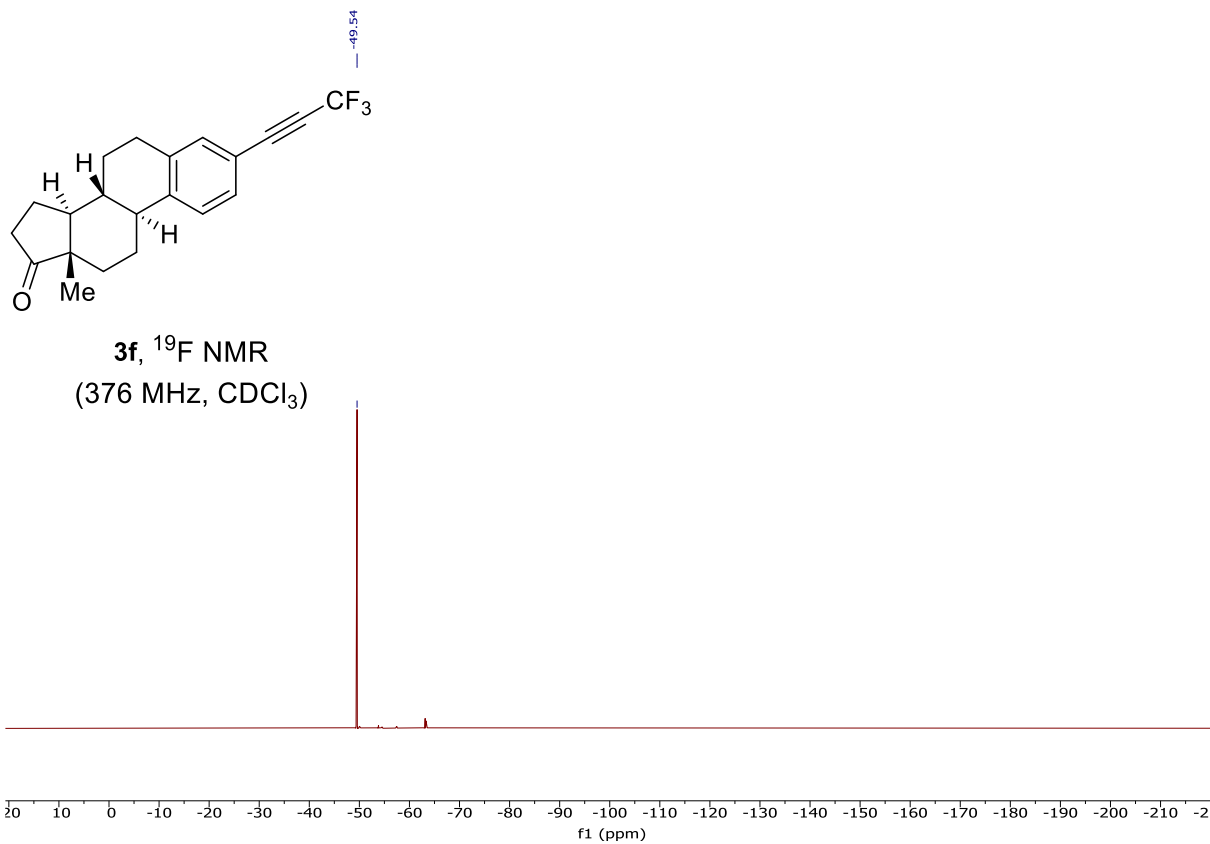

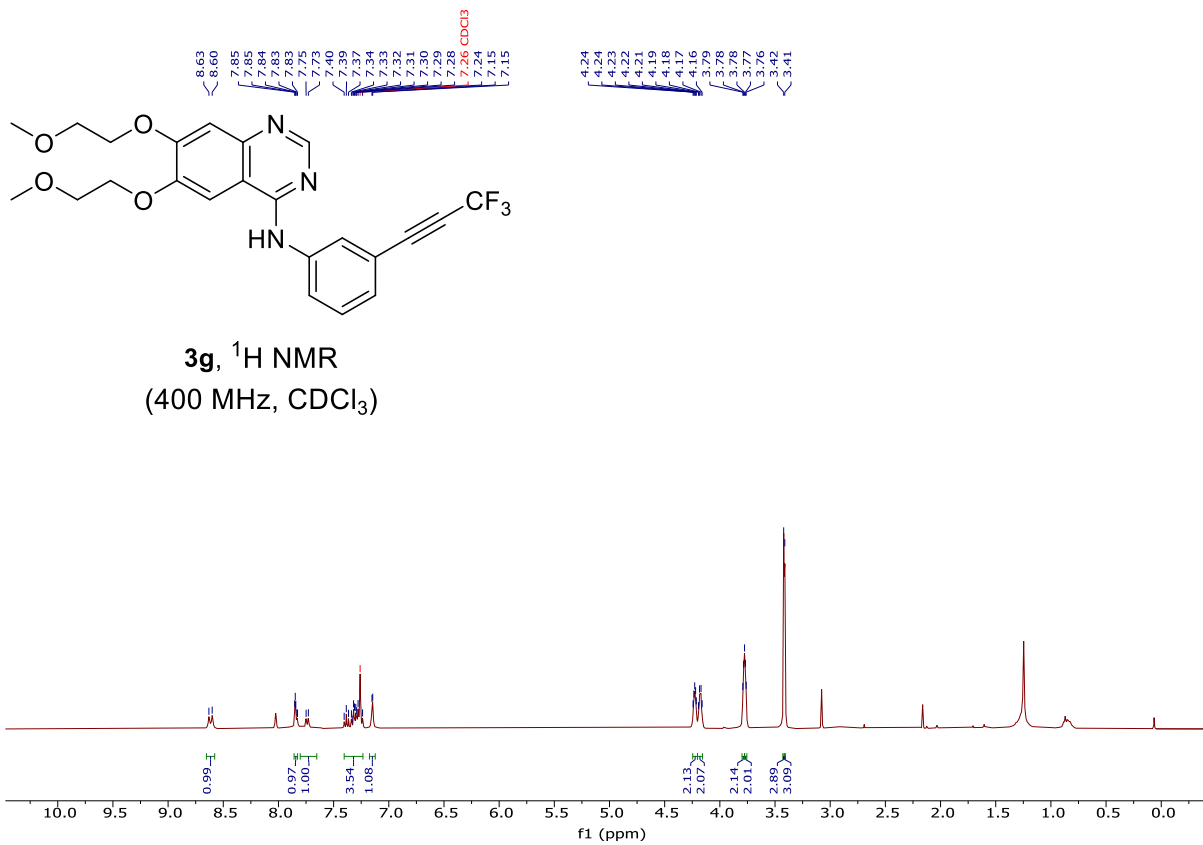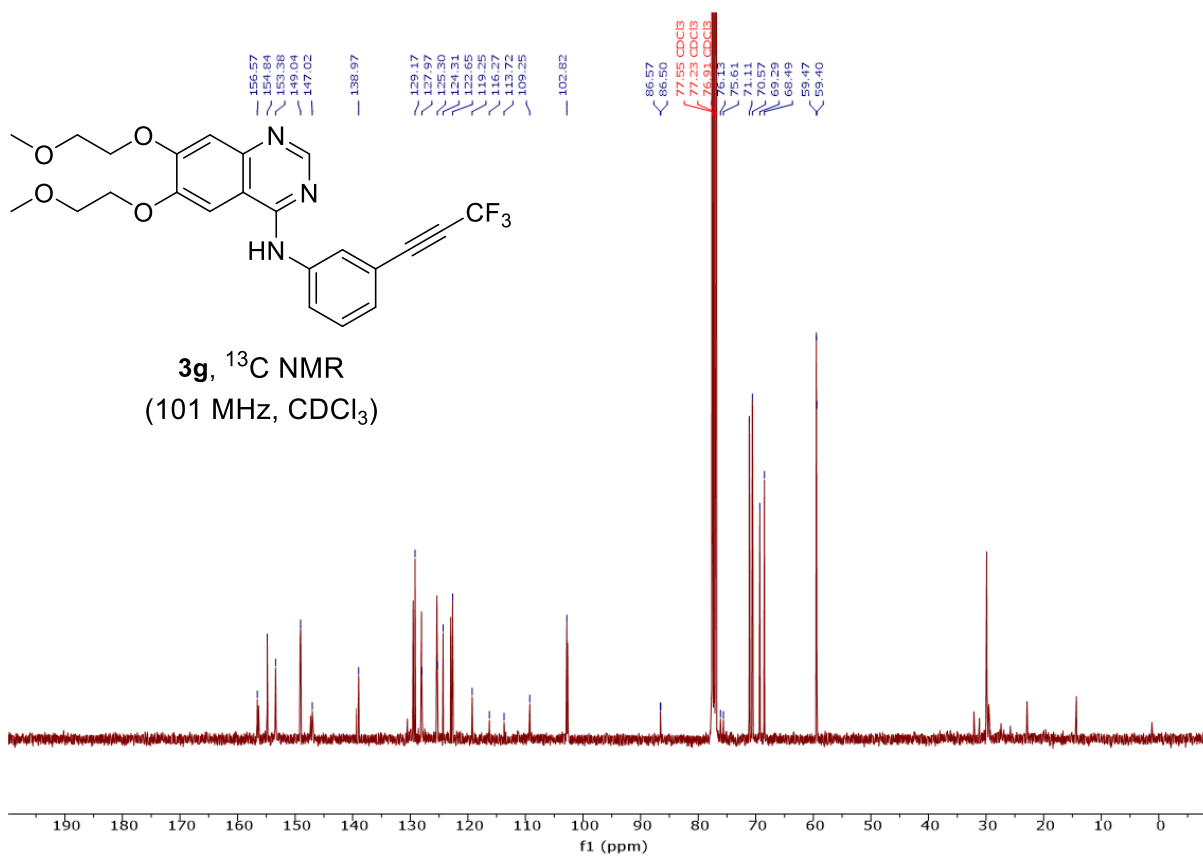

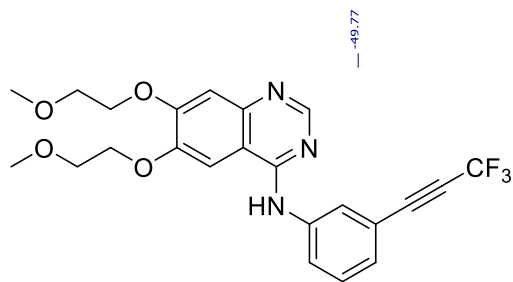

**3g**,  $^{19}\text{F}$  NMR  
(376 MHz,  $\text{CDCl}_3$ )

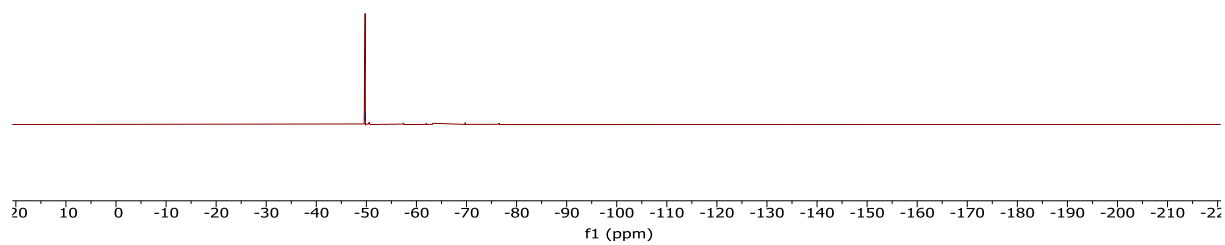

Supplement: d4sc06780k1.pdf [file d4sc06780k1.pdf]
